# Supplementary material for: The impact of transport model differences on CO 2 surface flux estimates from OCO-2 retrievals of column average CO 2
Source: Copernicus journal article supplement (doi:10.5194/acp-18-7189-2018), 2018-05-24

# Terrestrial CO<sub>2</sub> flux from Eurasian Boreal

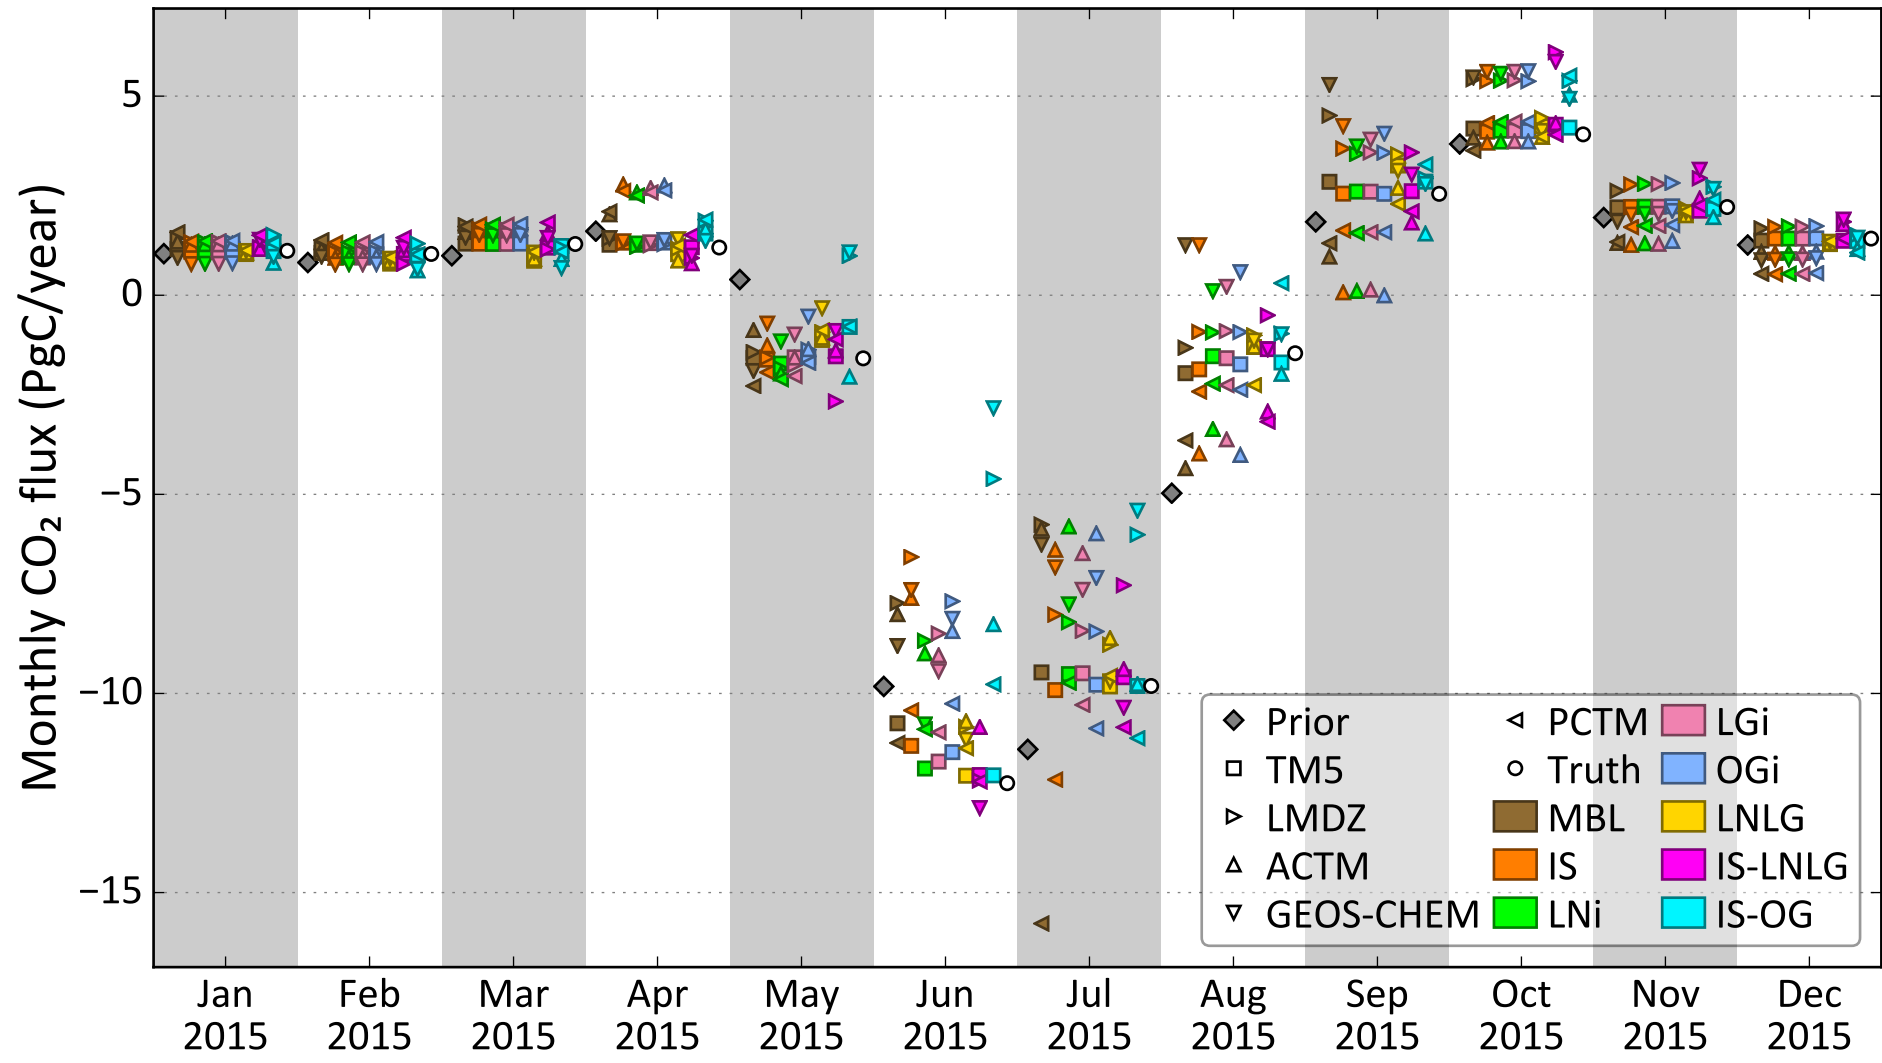

# Terrestrial CO<sub>2</sub> flux from Eurasian Temperate

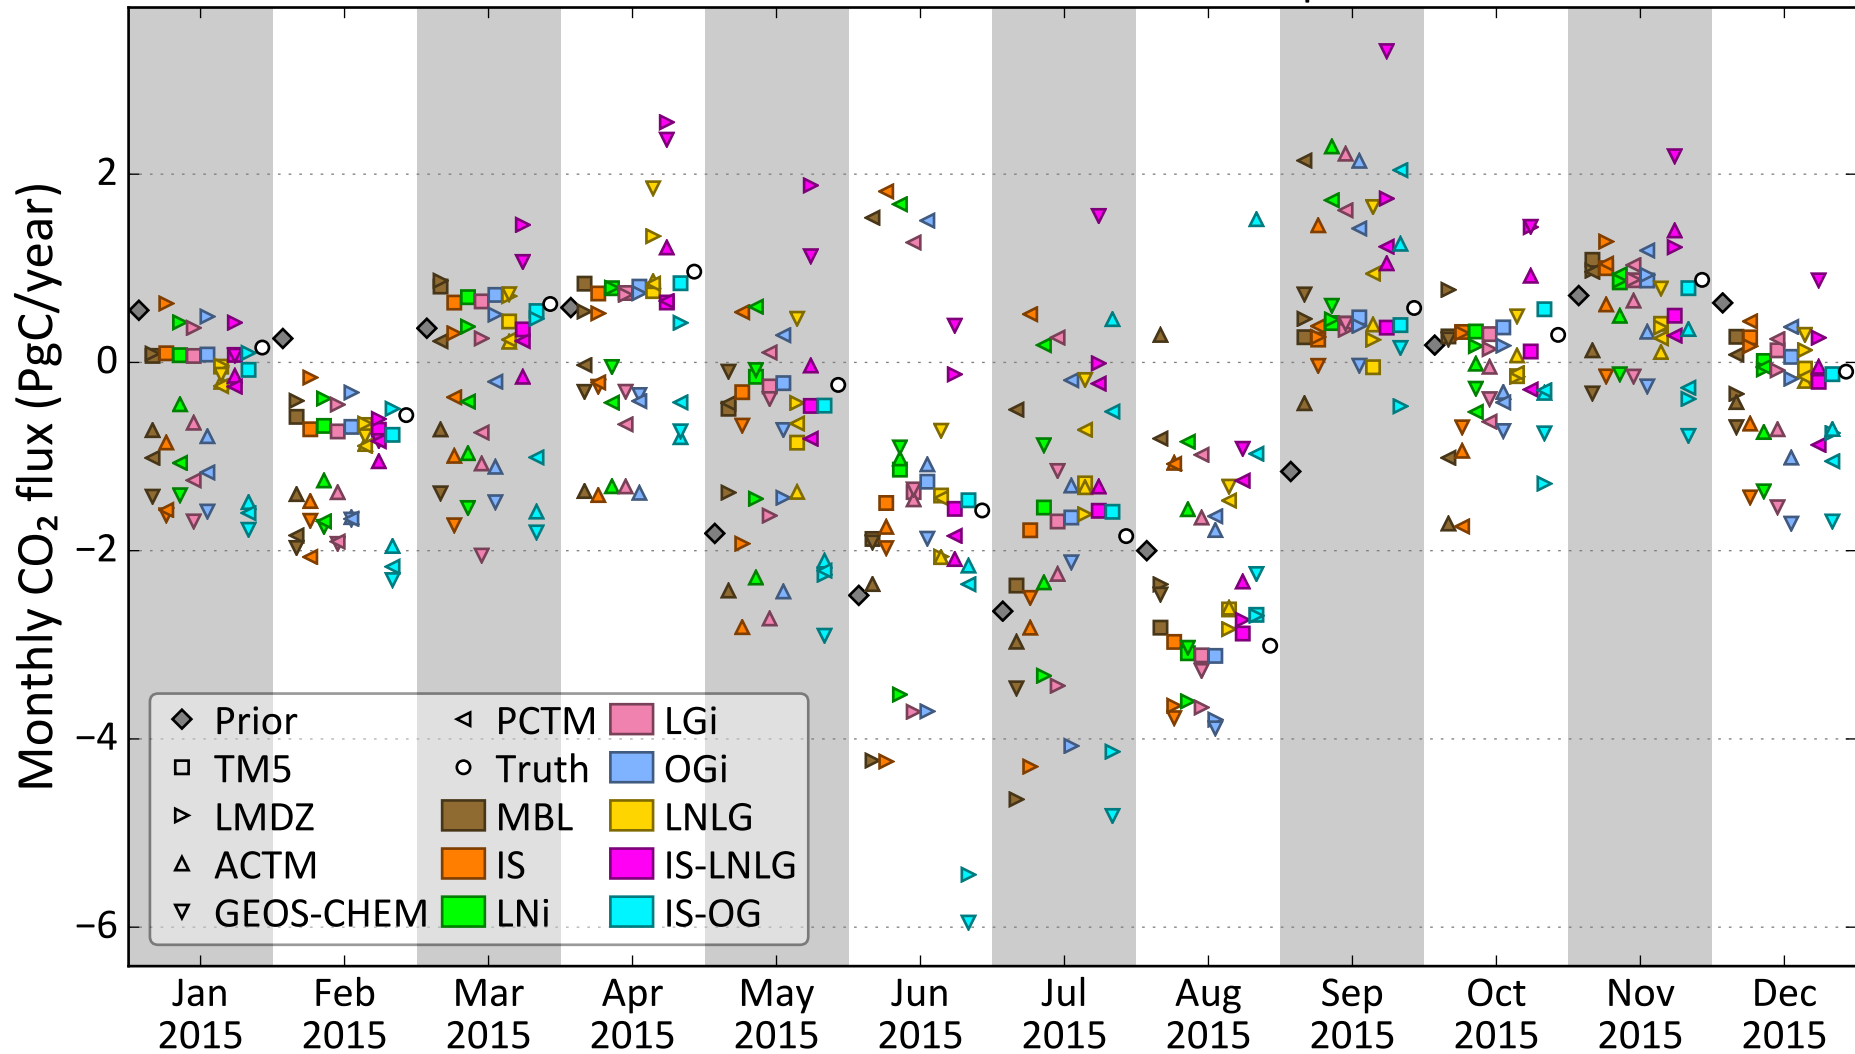

# Terrestrial CO<sub>2</sub> flux from Europe

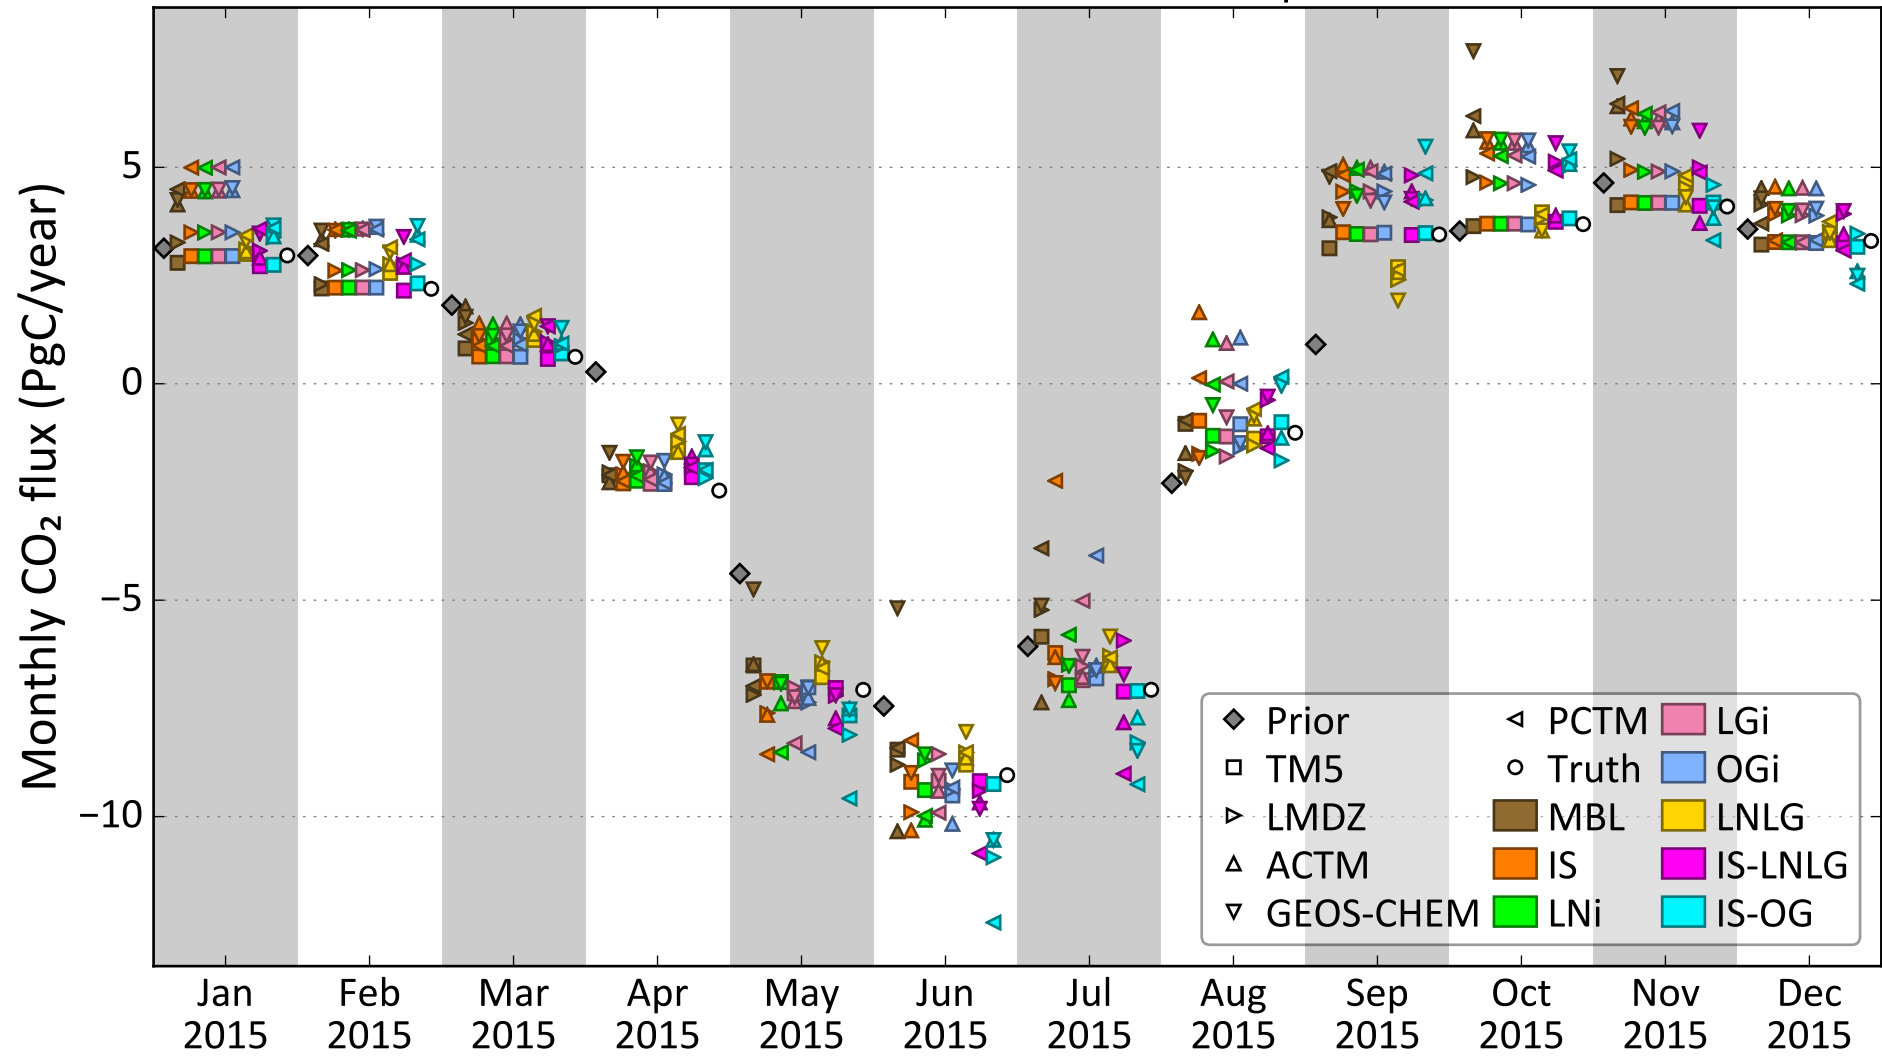

# Terrestrial CO<sub>2</sub> flux from North American Boreal

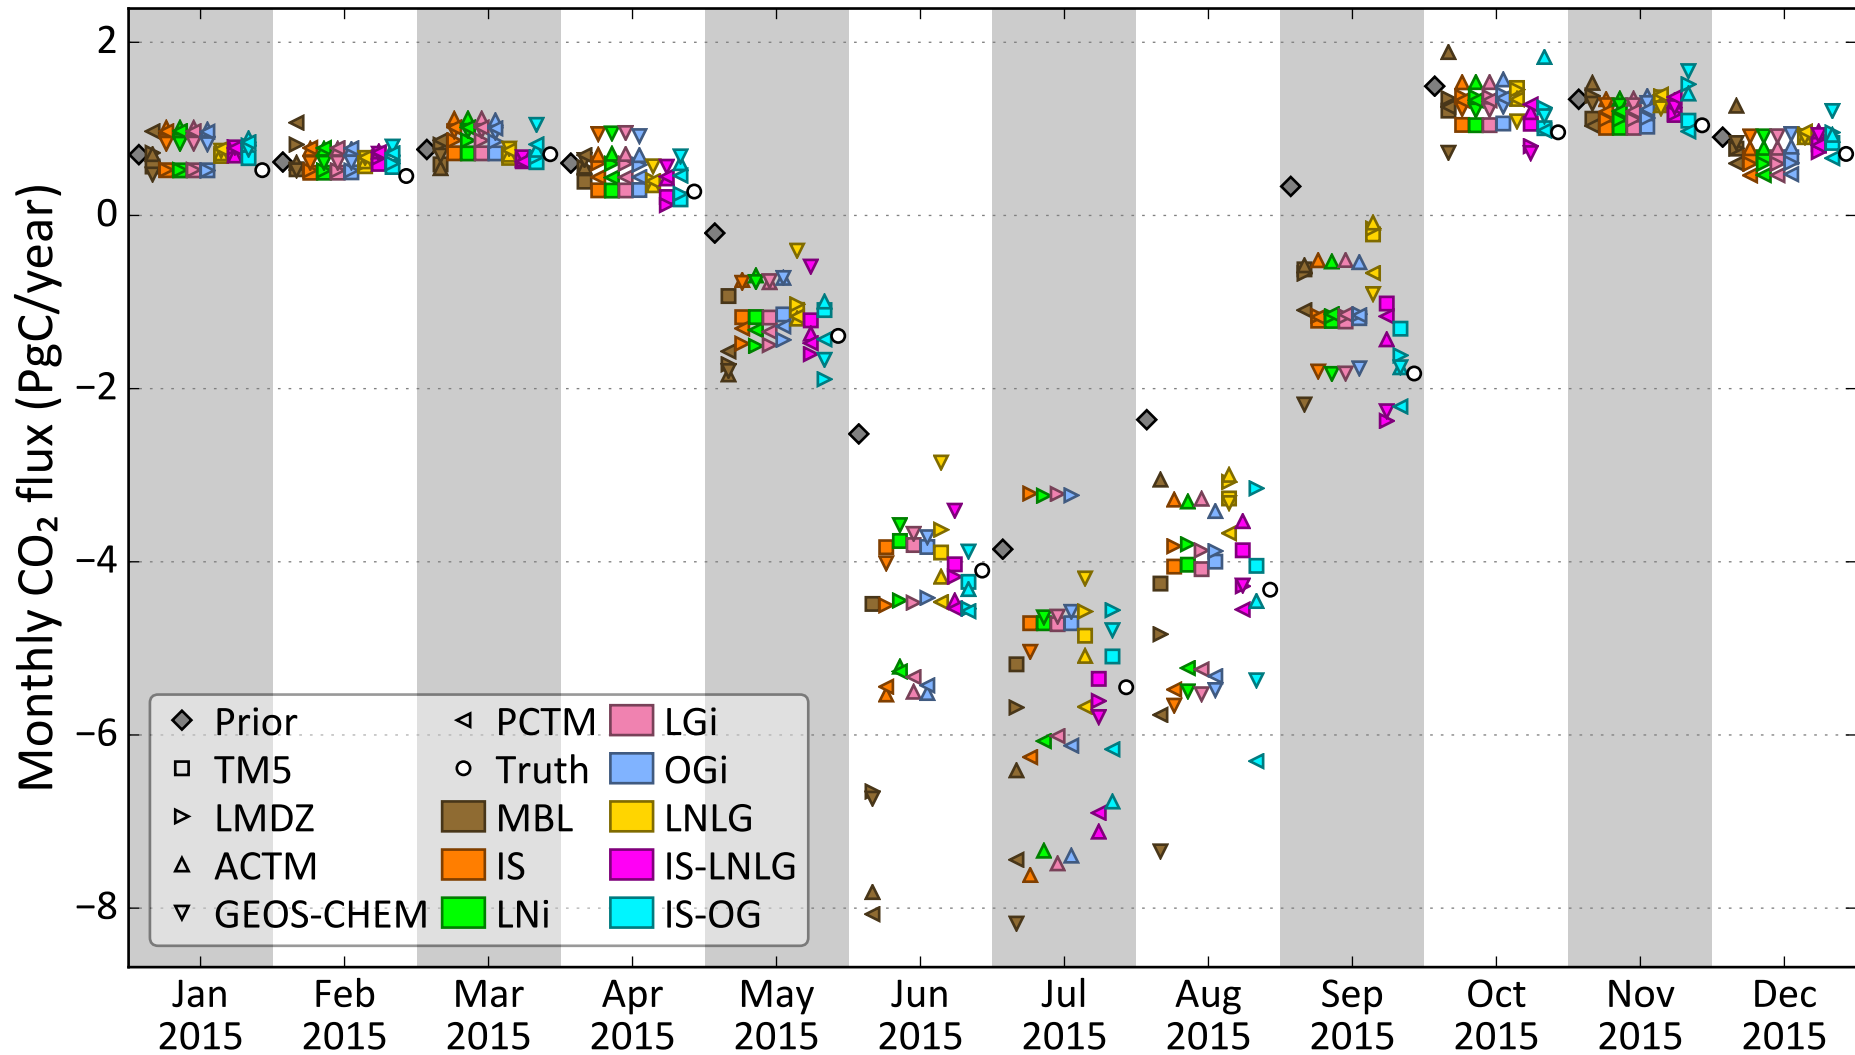

Terrestrial CO<sub>2</sub> flux from North American Temperate

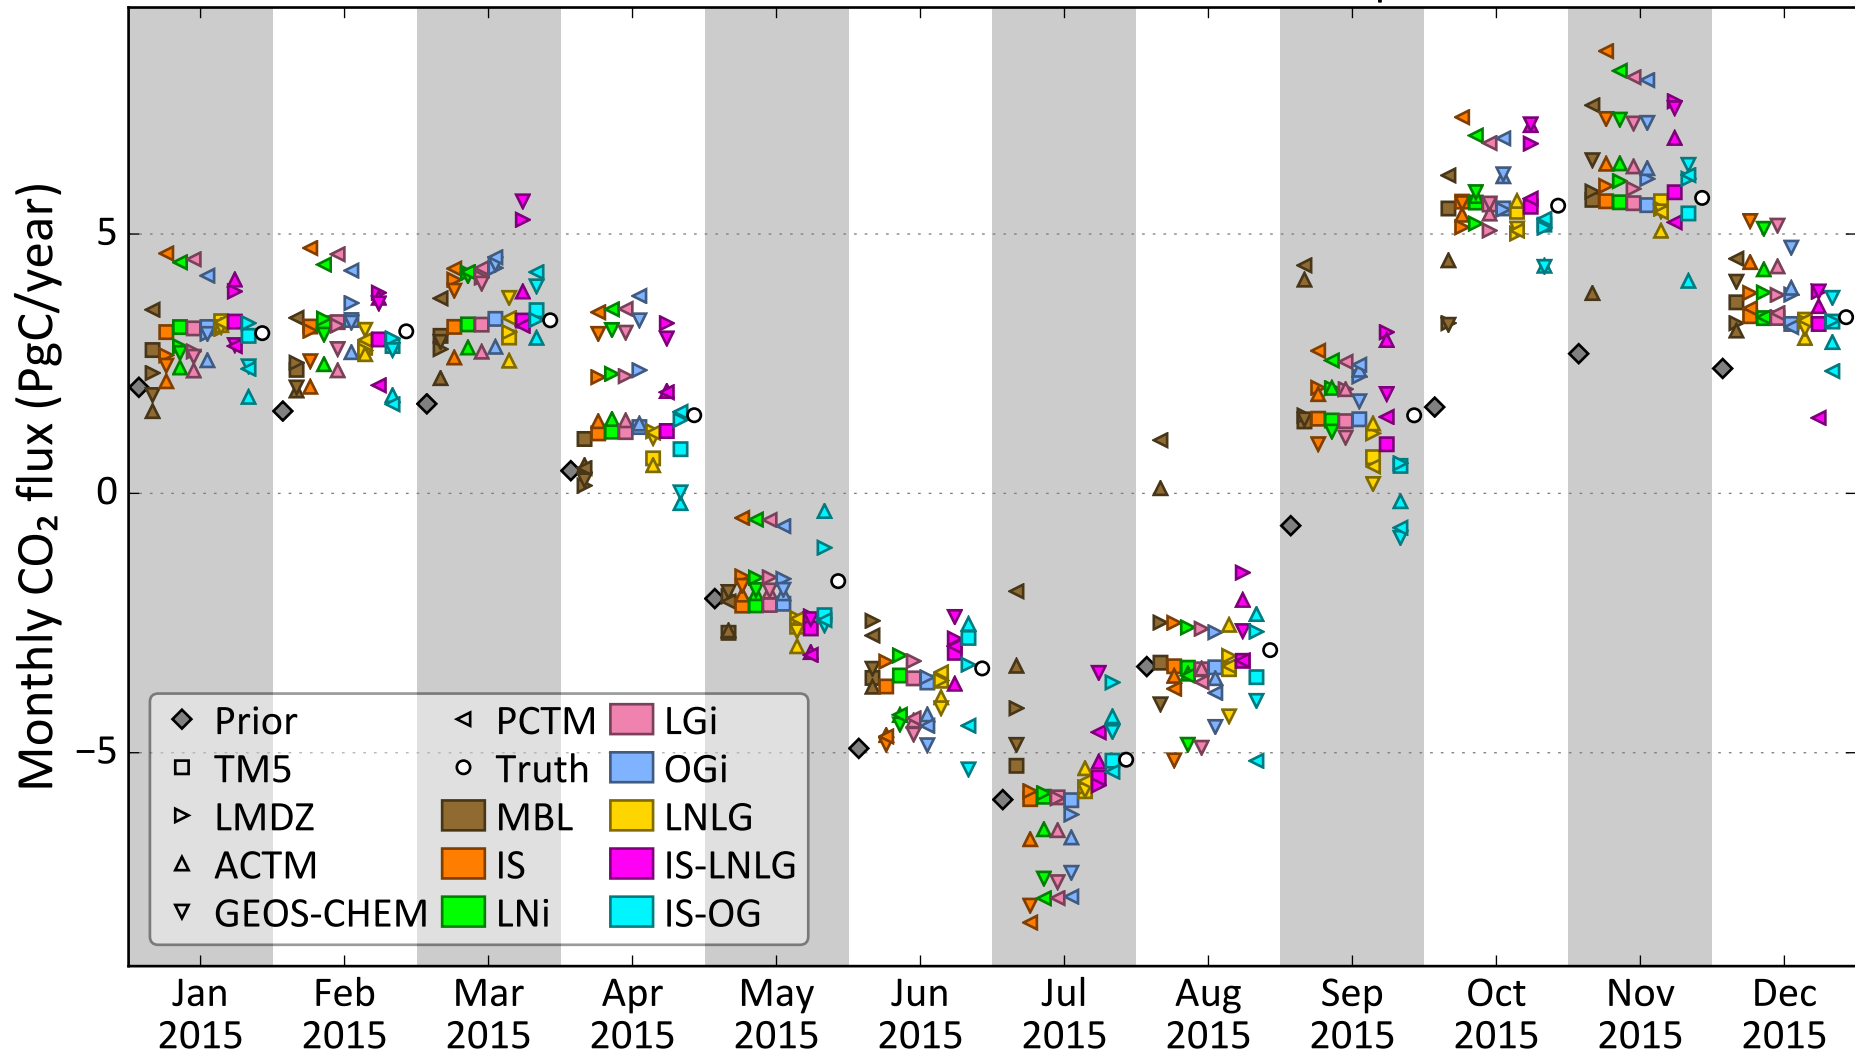

# Terrestrial CO<sub>2</sub> flux from Saharan Africa

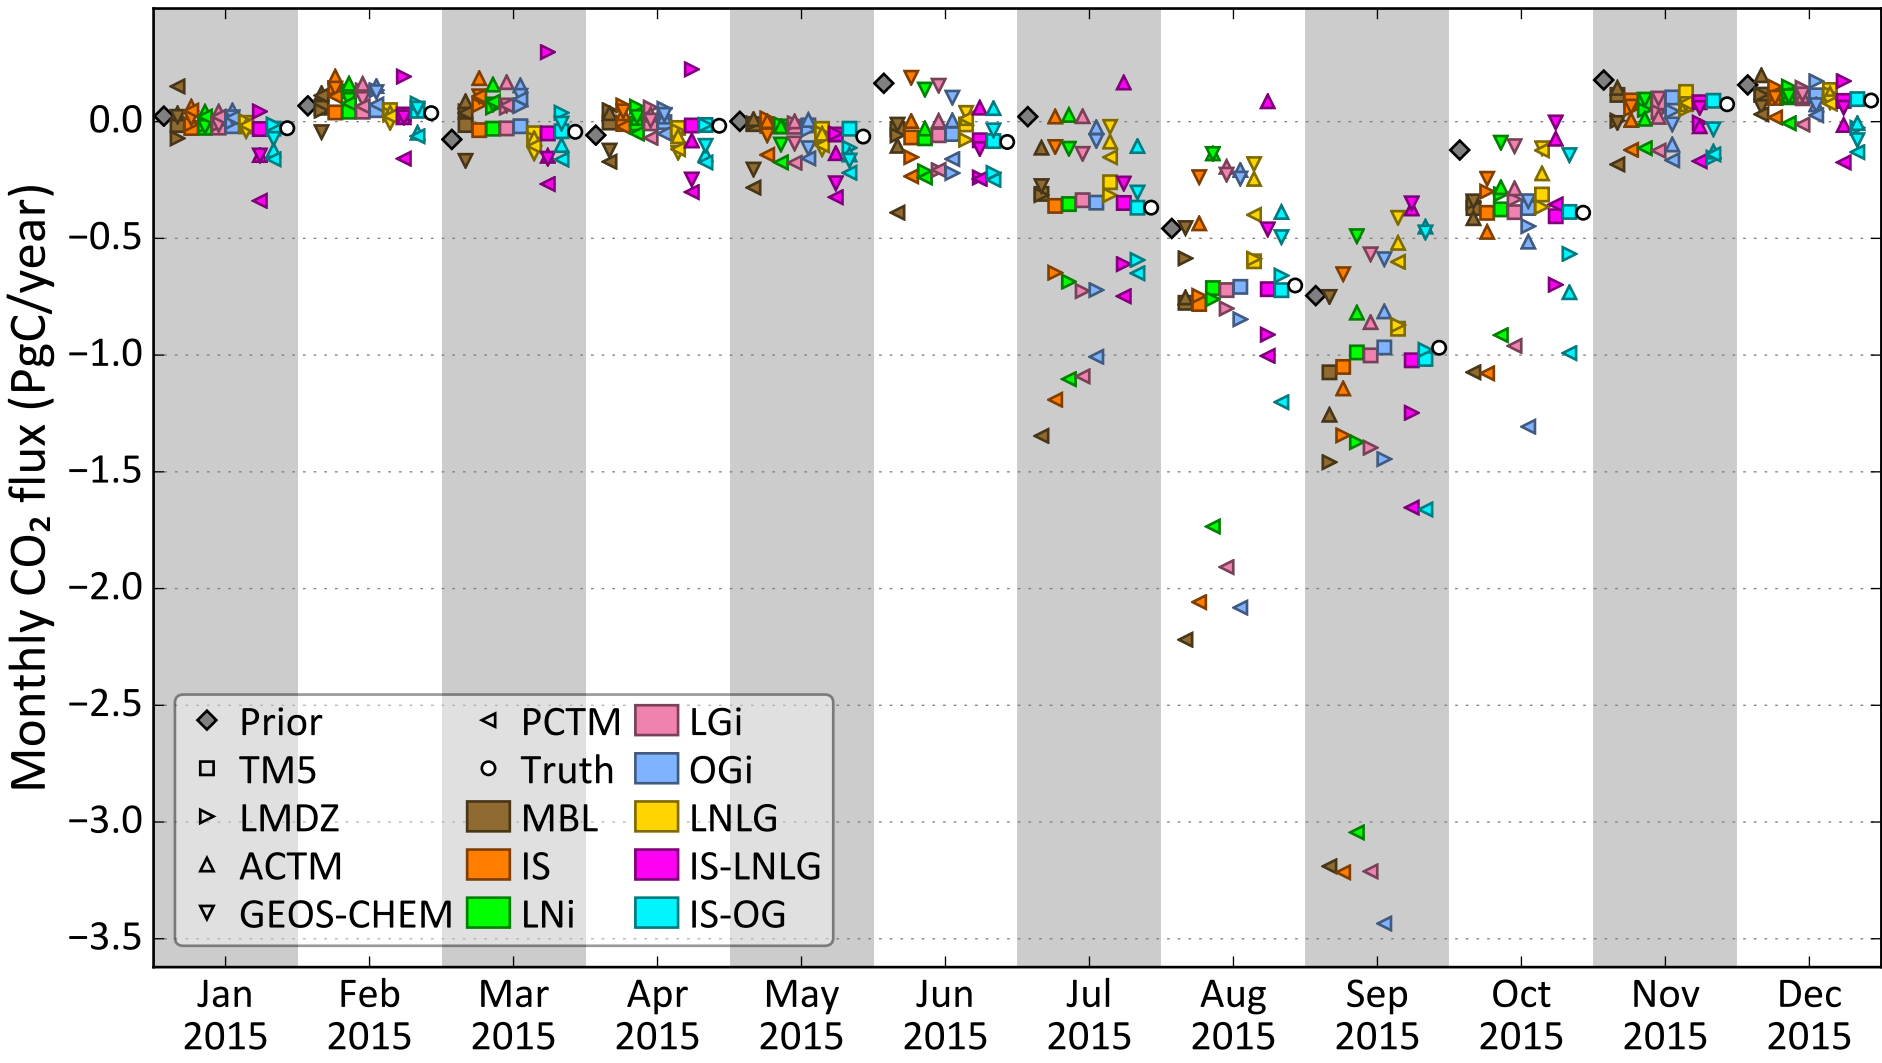

# Terrestrial CO<sub>2</sub> flux from South American Temperate

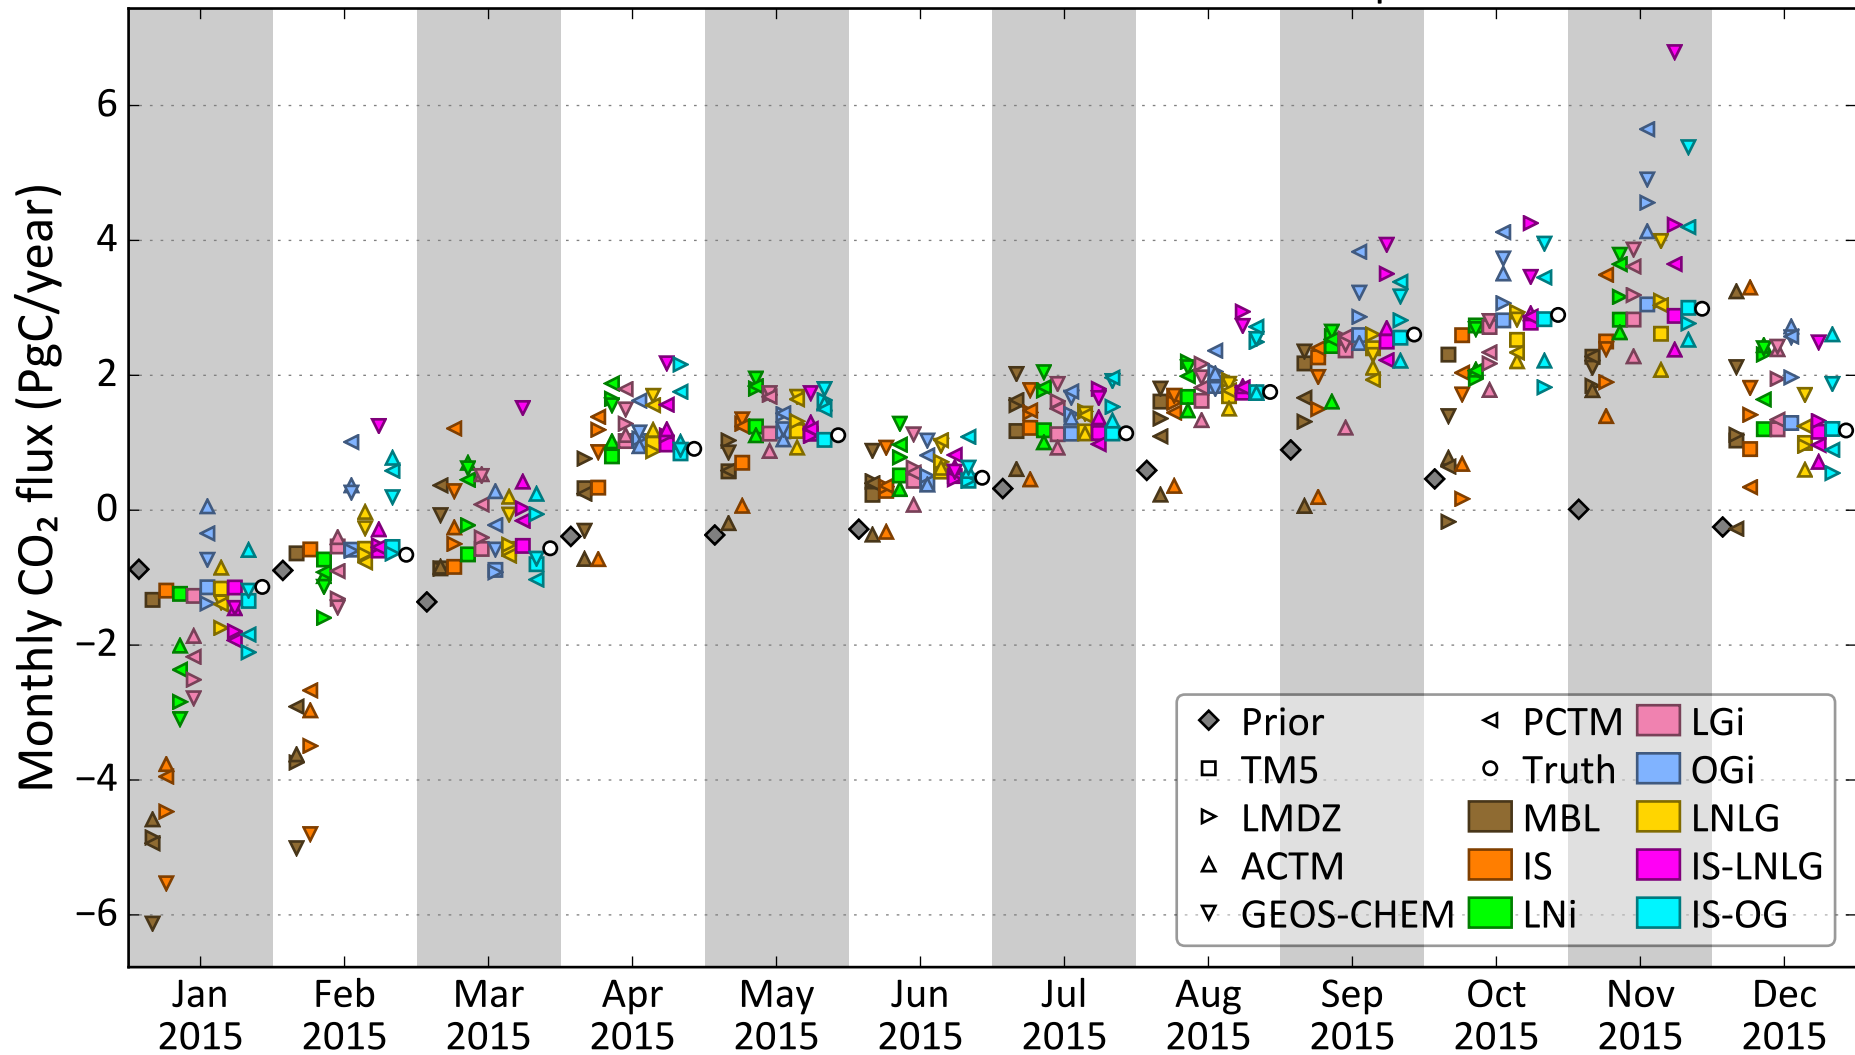

# Terrestrial CO<sub>2</sub> flux from South American Tropical

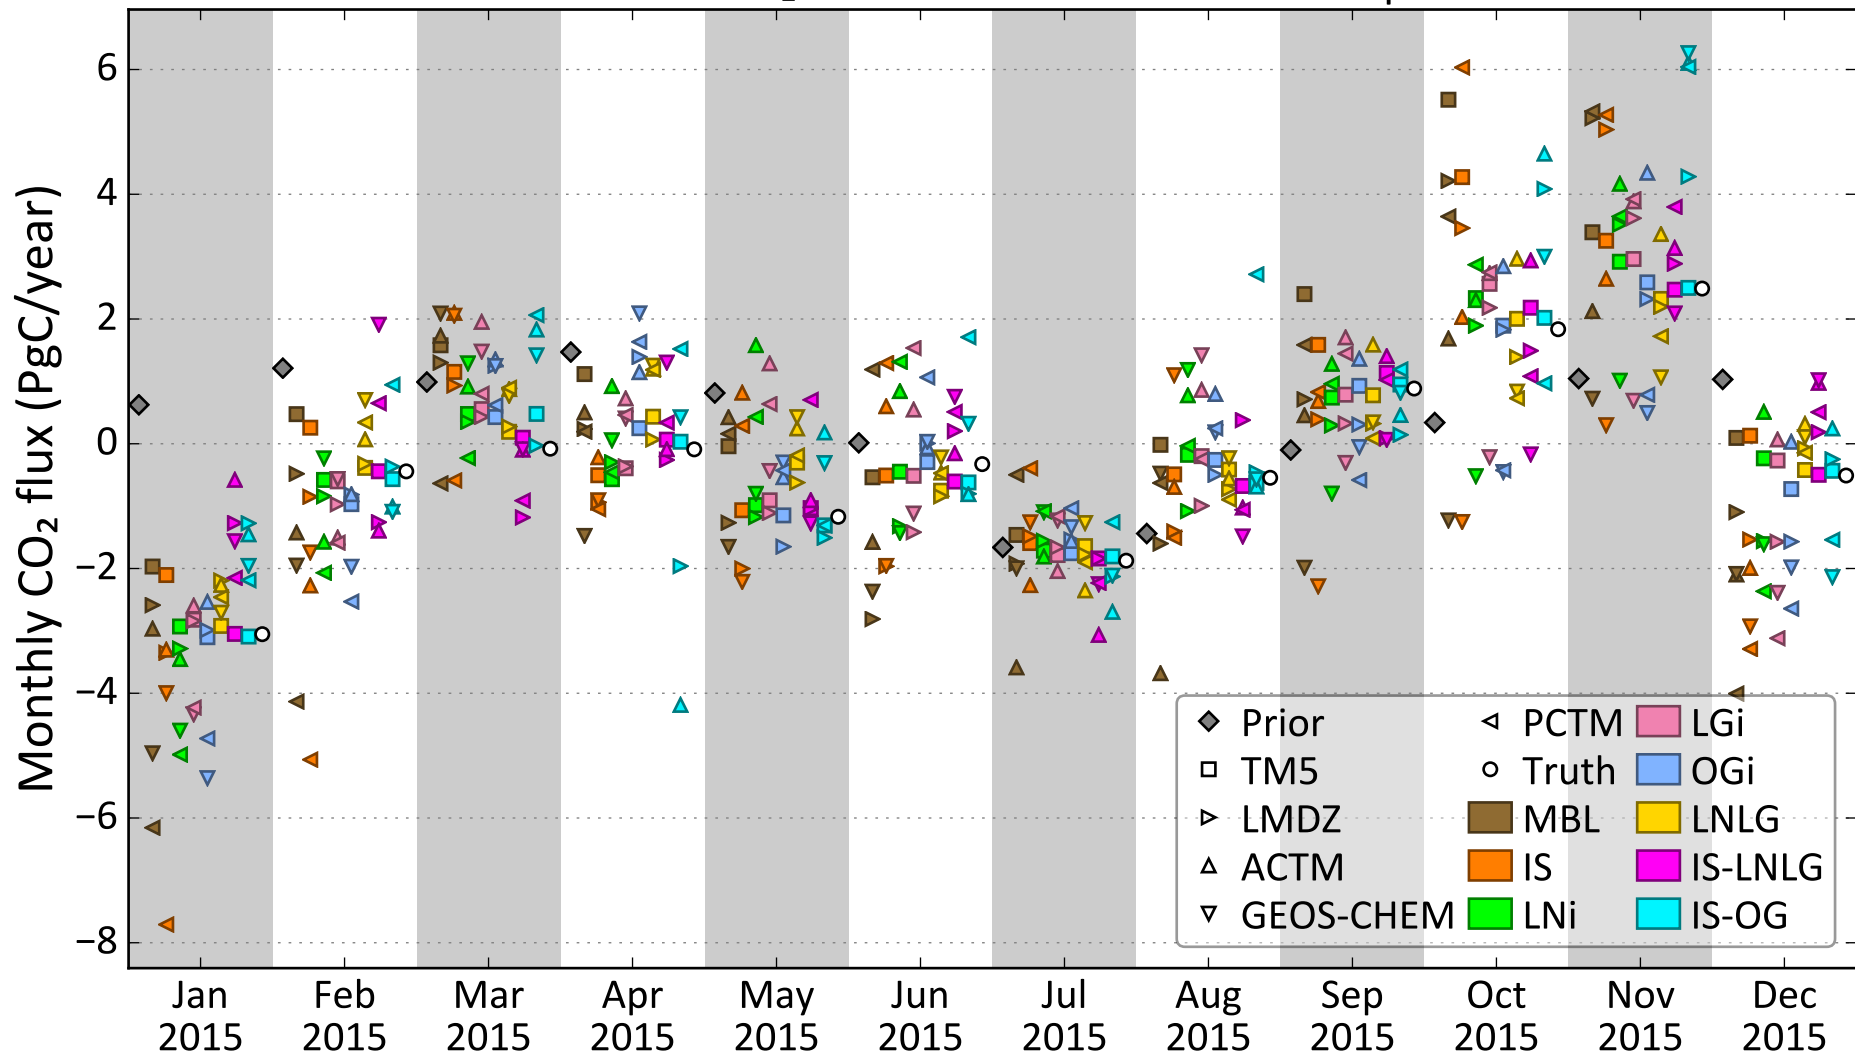

# Terrestrial CO<sub>2</sub> flux from Sub-Saharan Africa

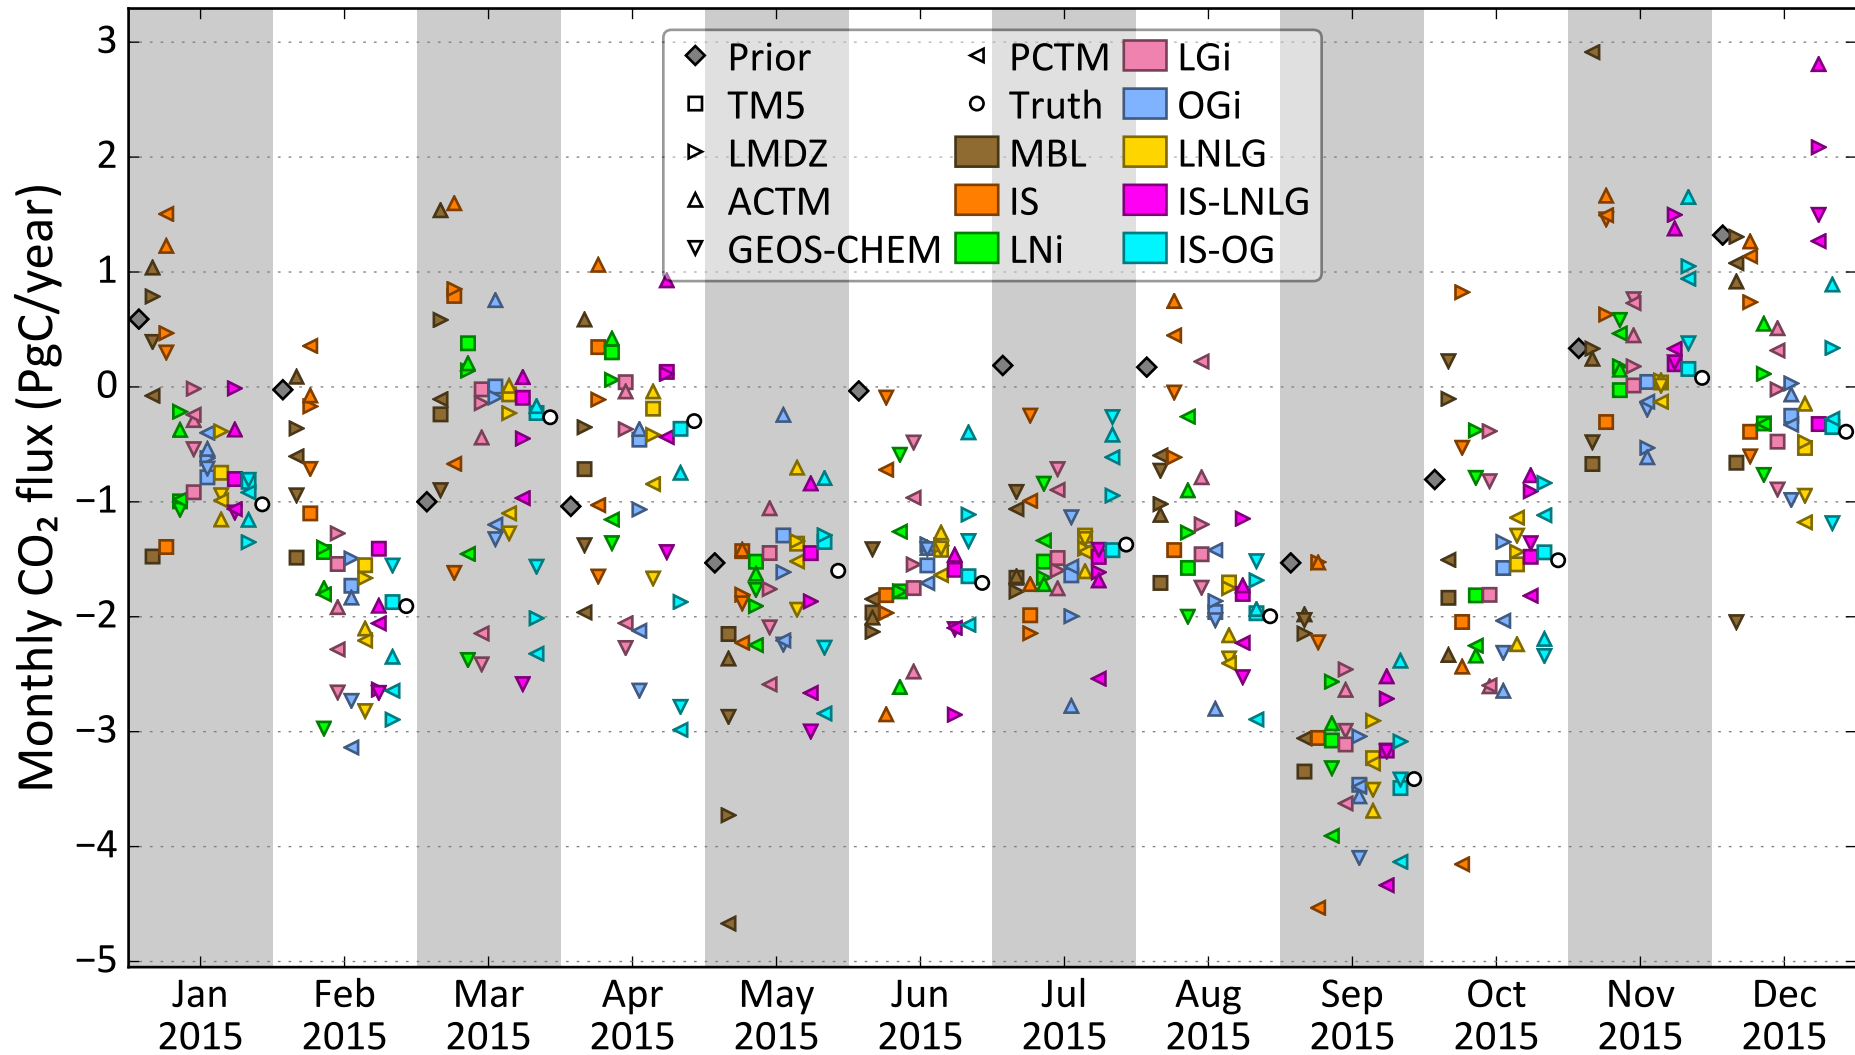

# Terrestrial CO<sub>2</sub> flux from Tropical Asia

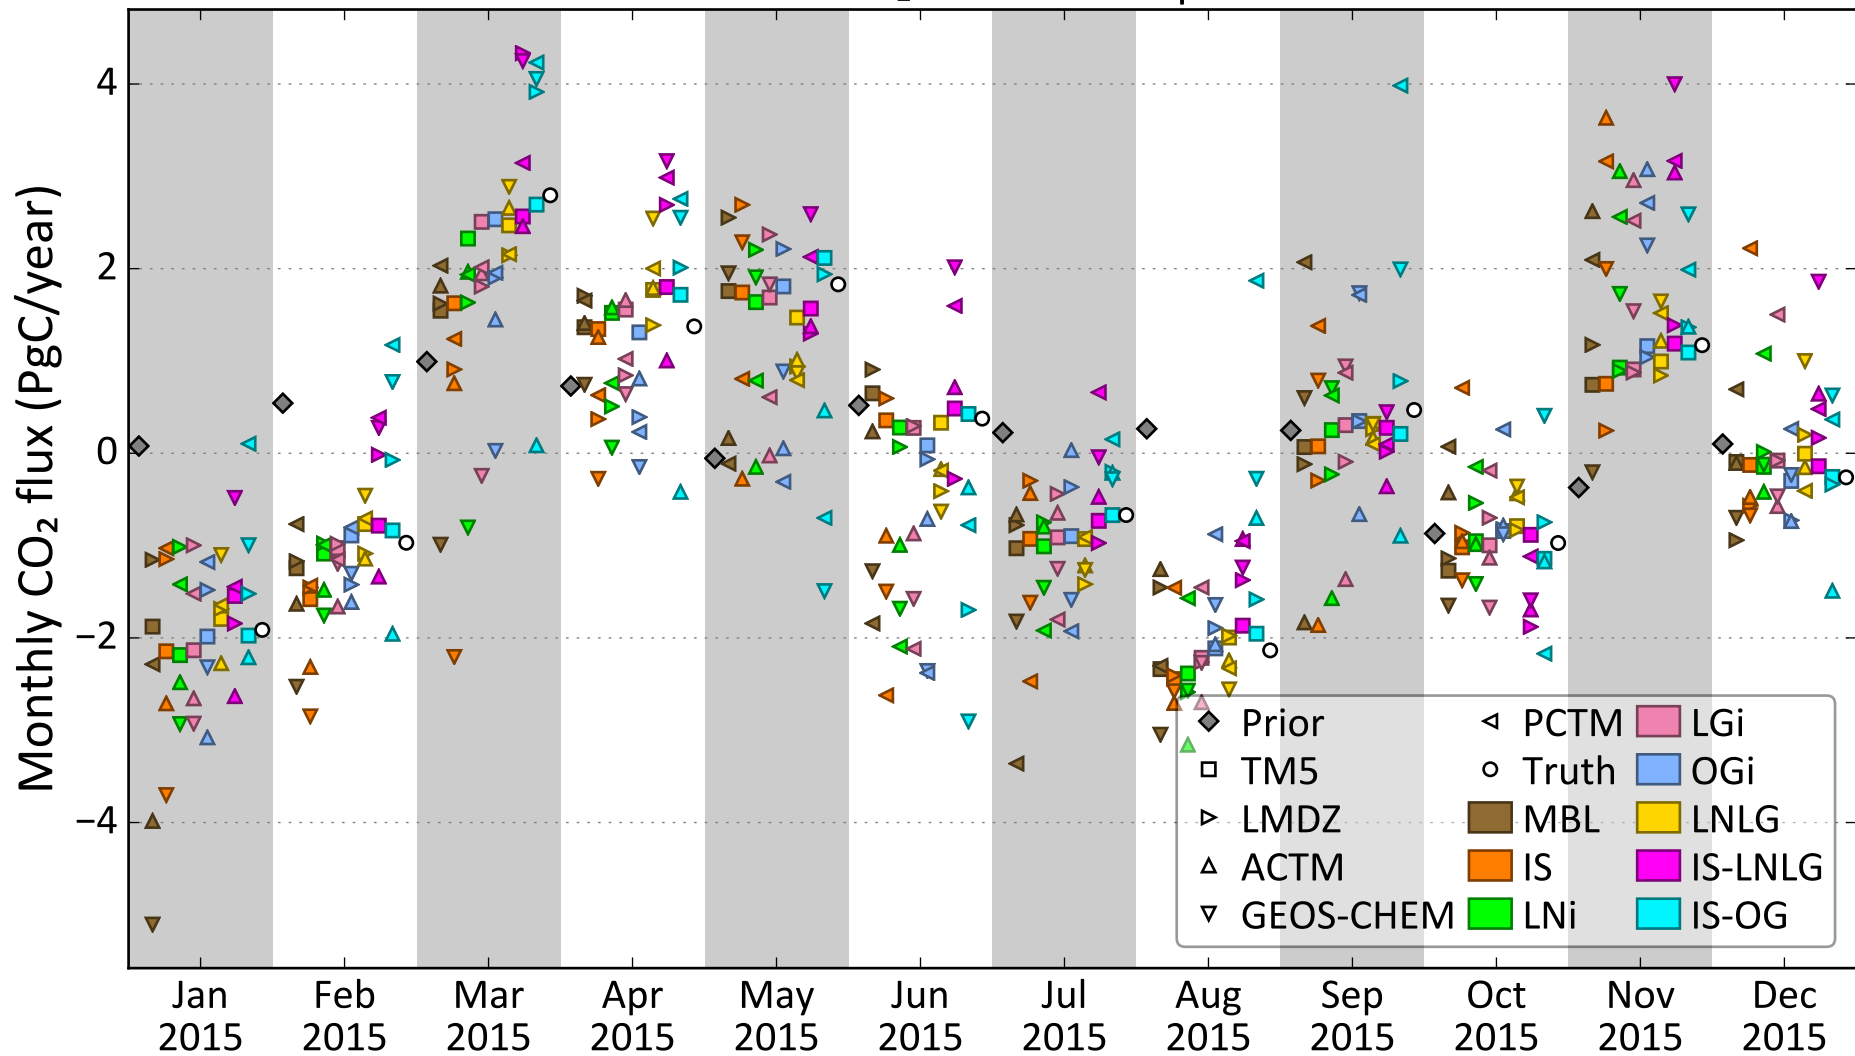

# Terrestrial CO<sub>2</sub> flux from Australia

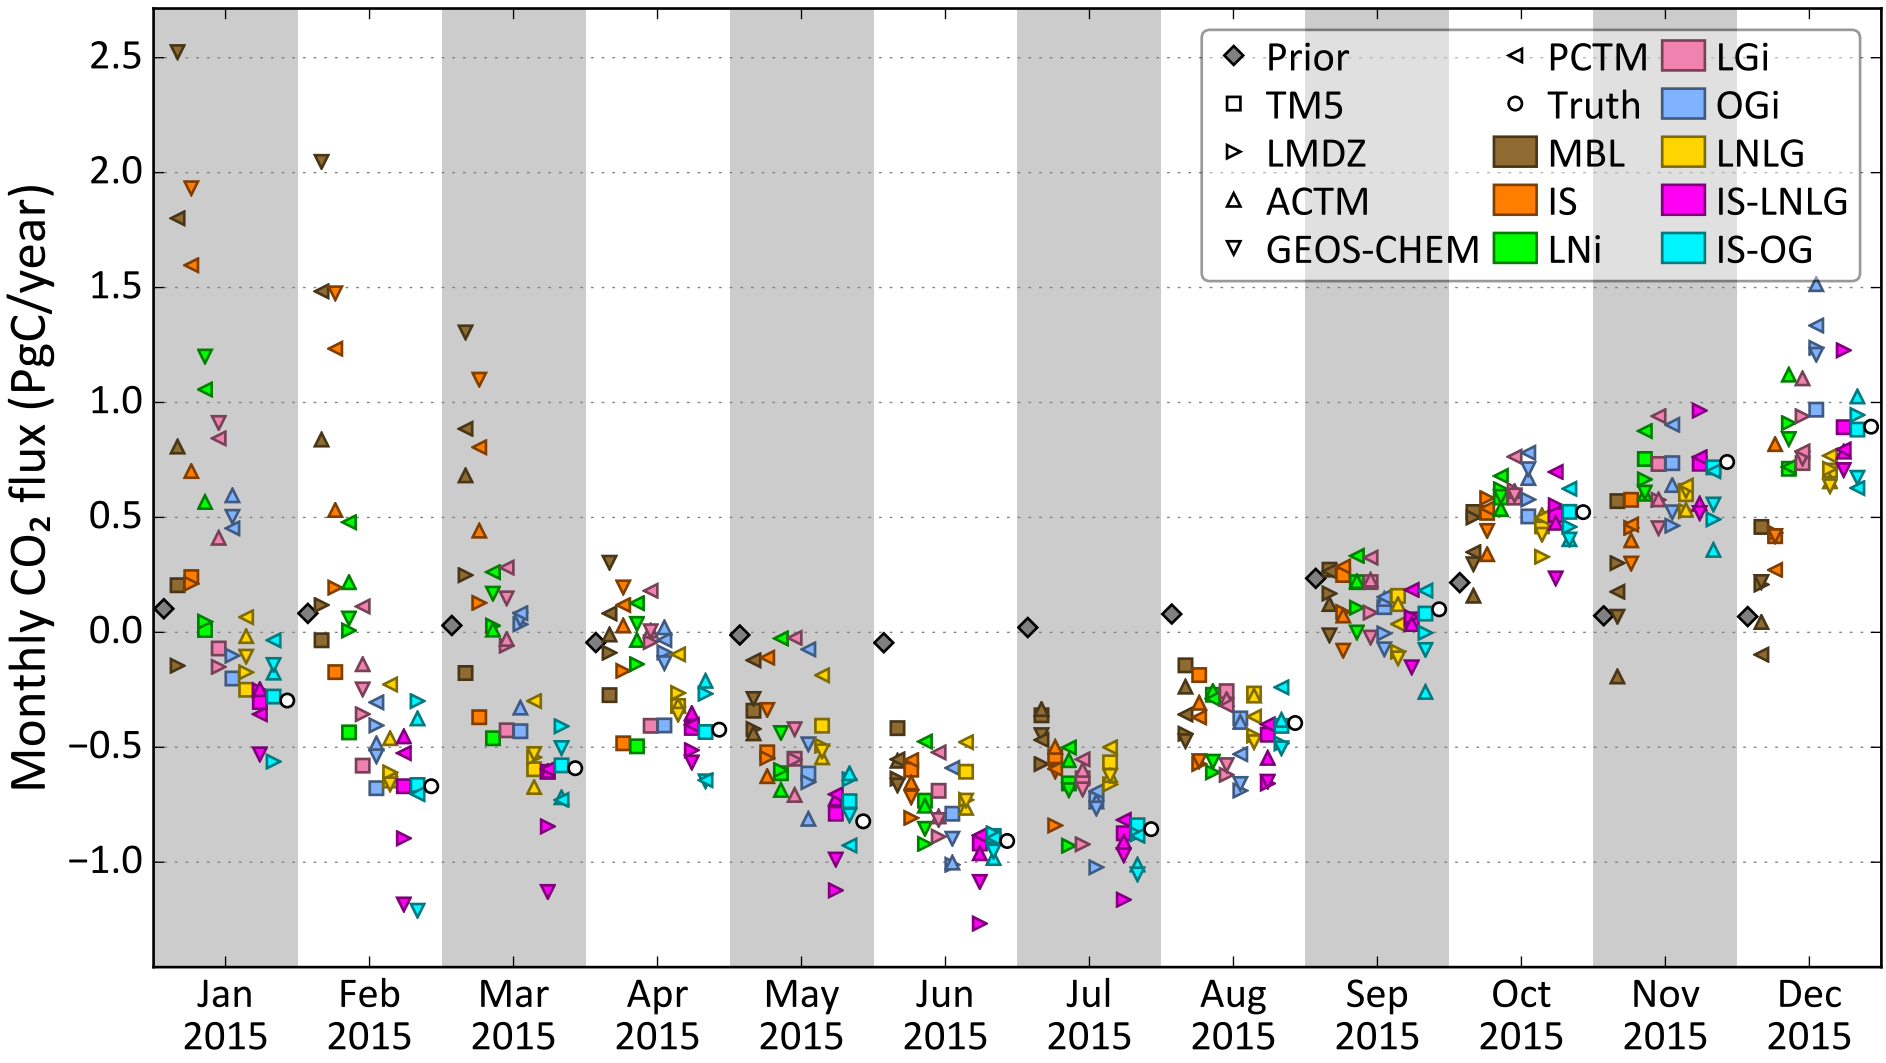

# Terrestrial CO<sub>2</sub> flux from North America

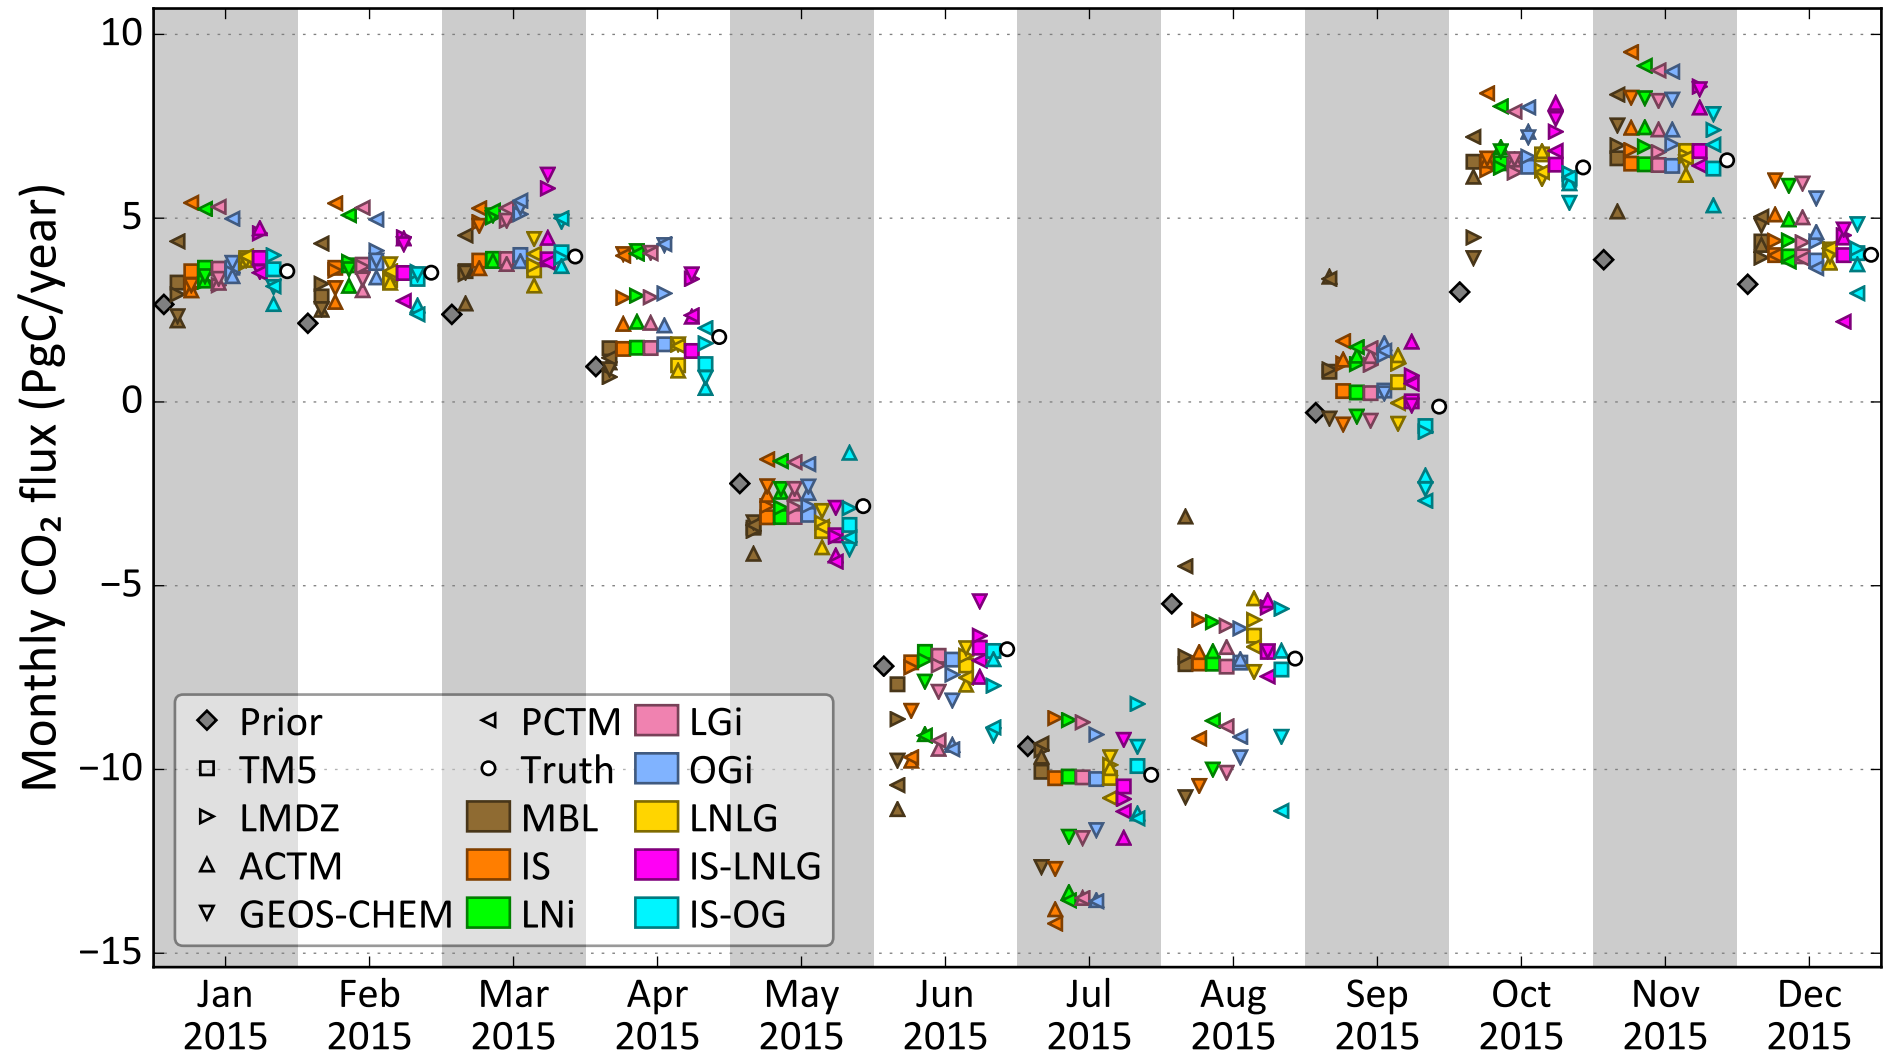

# Terrestrial CO<sub>2</sub> flux from South America

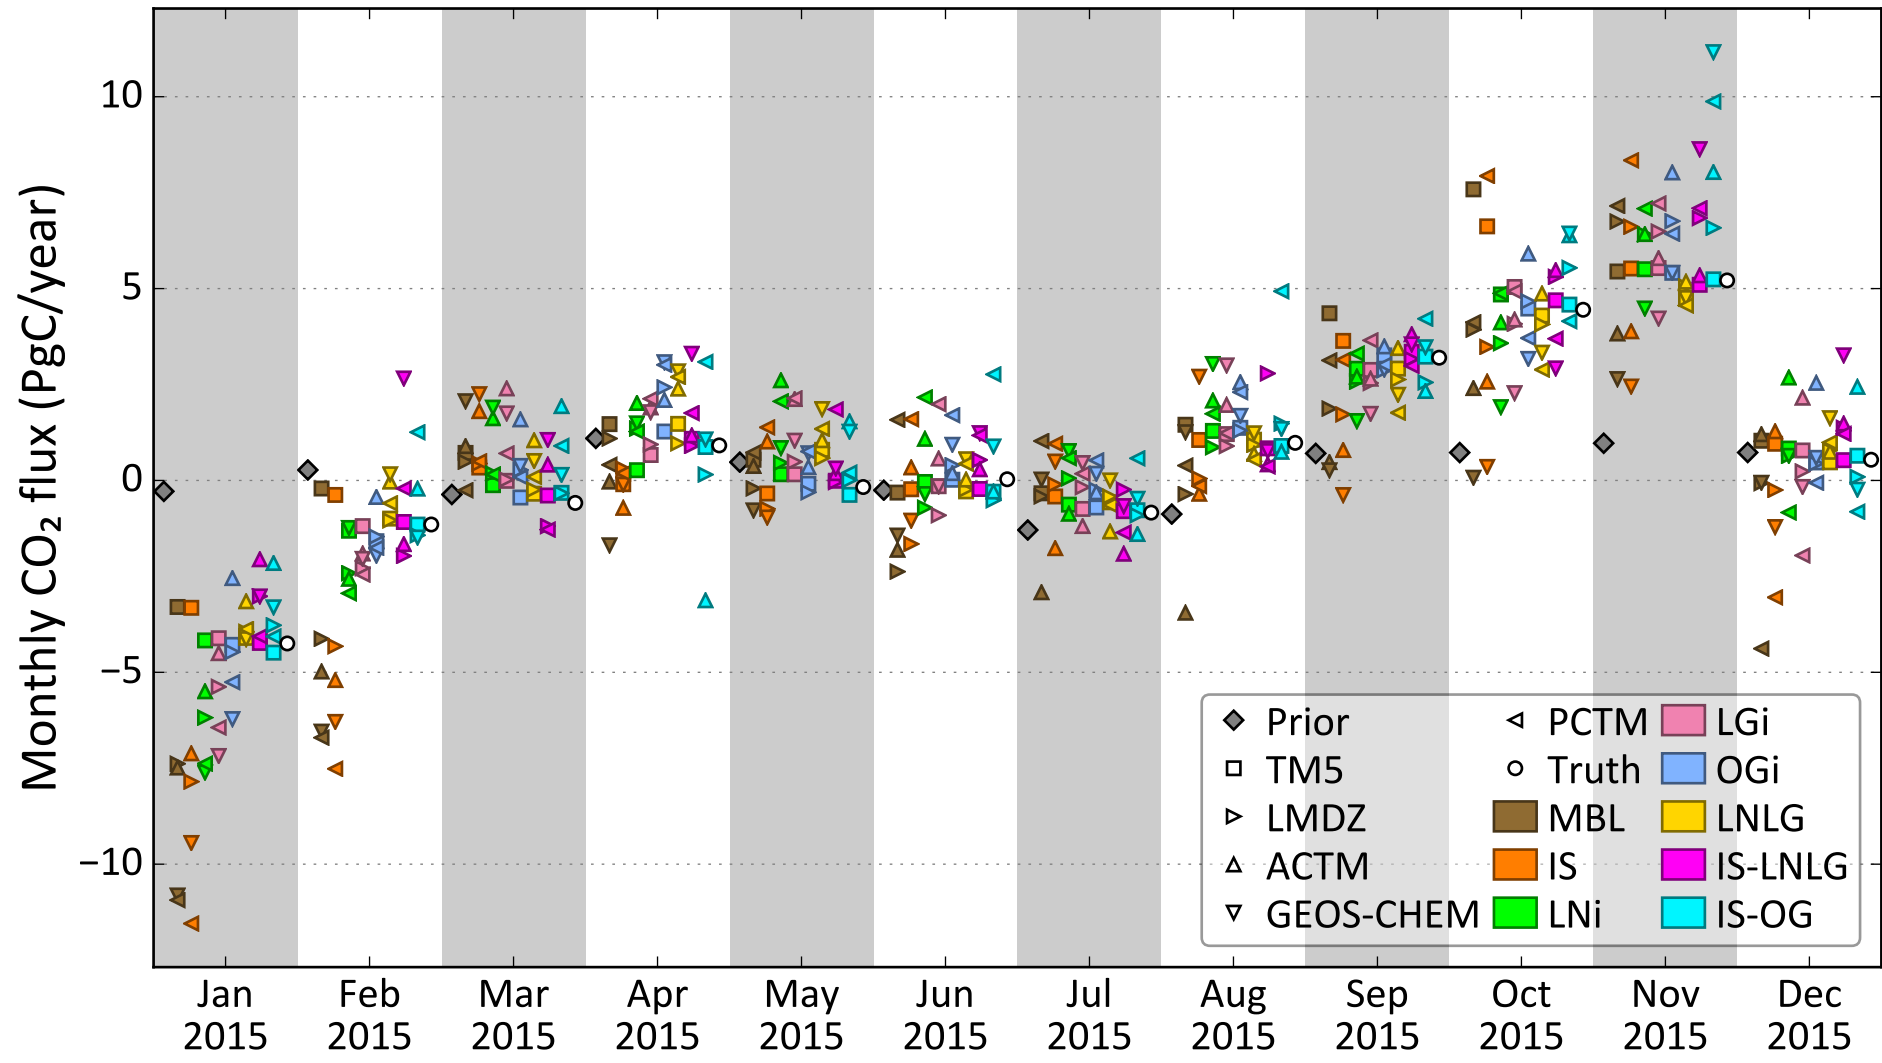

# Terrestrial CO<sub>2</sub> flux from Asia

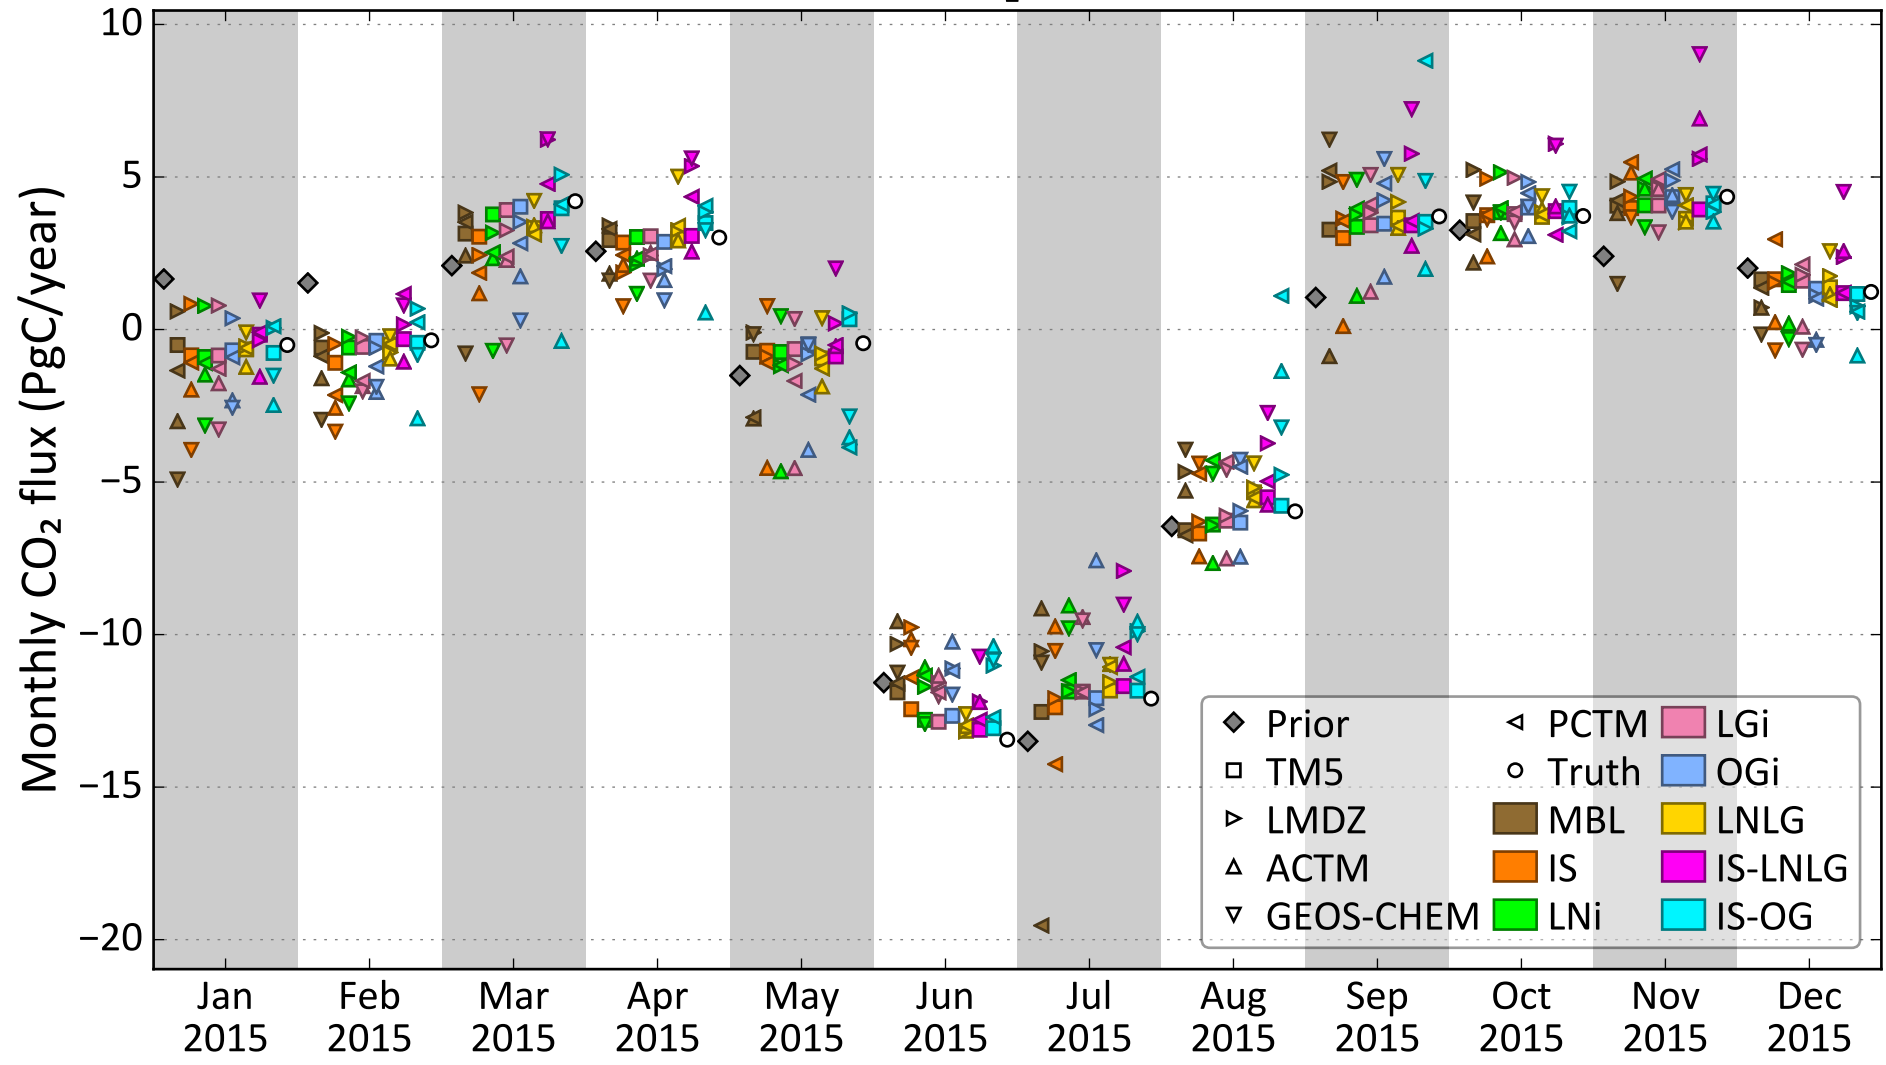

# Terrestrial CO<sub>2</sub> flux from Amazon Basin

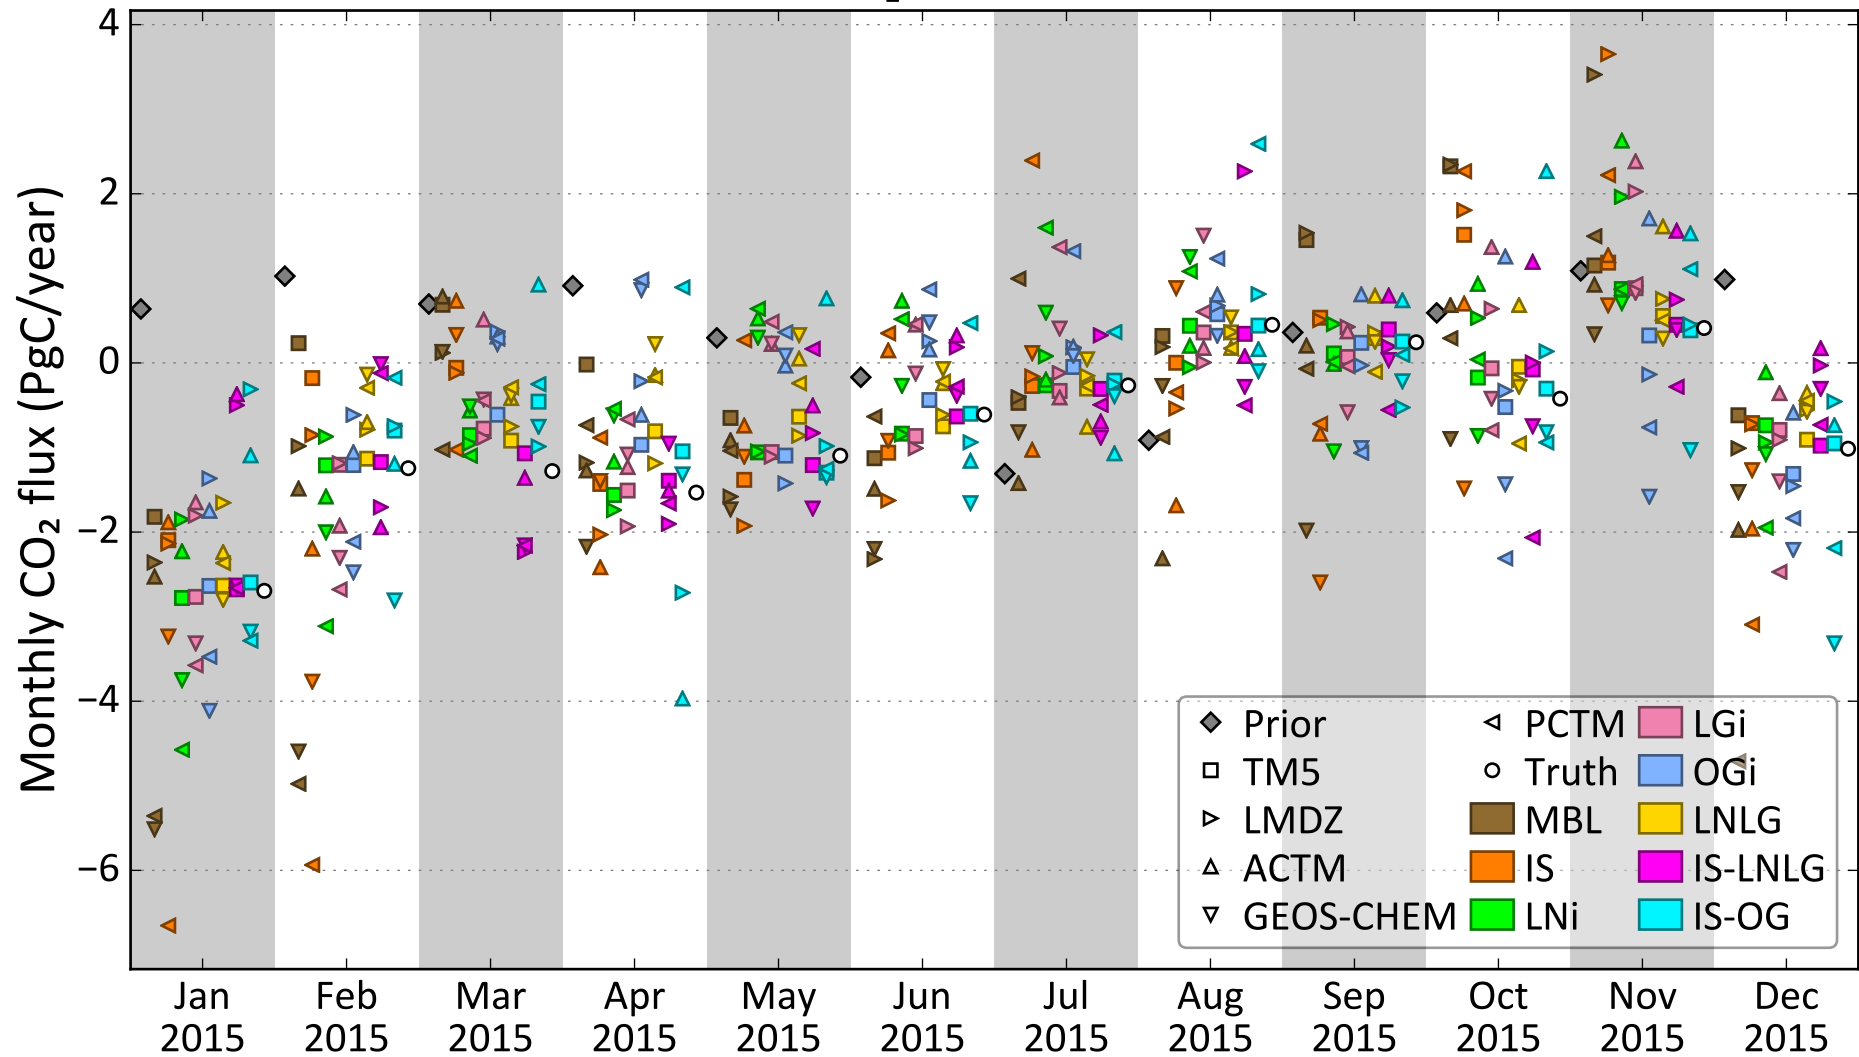

# Terrestrial CO<sub>2</sub> flux from Eurasia

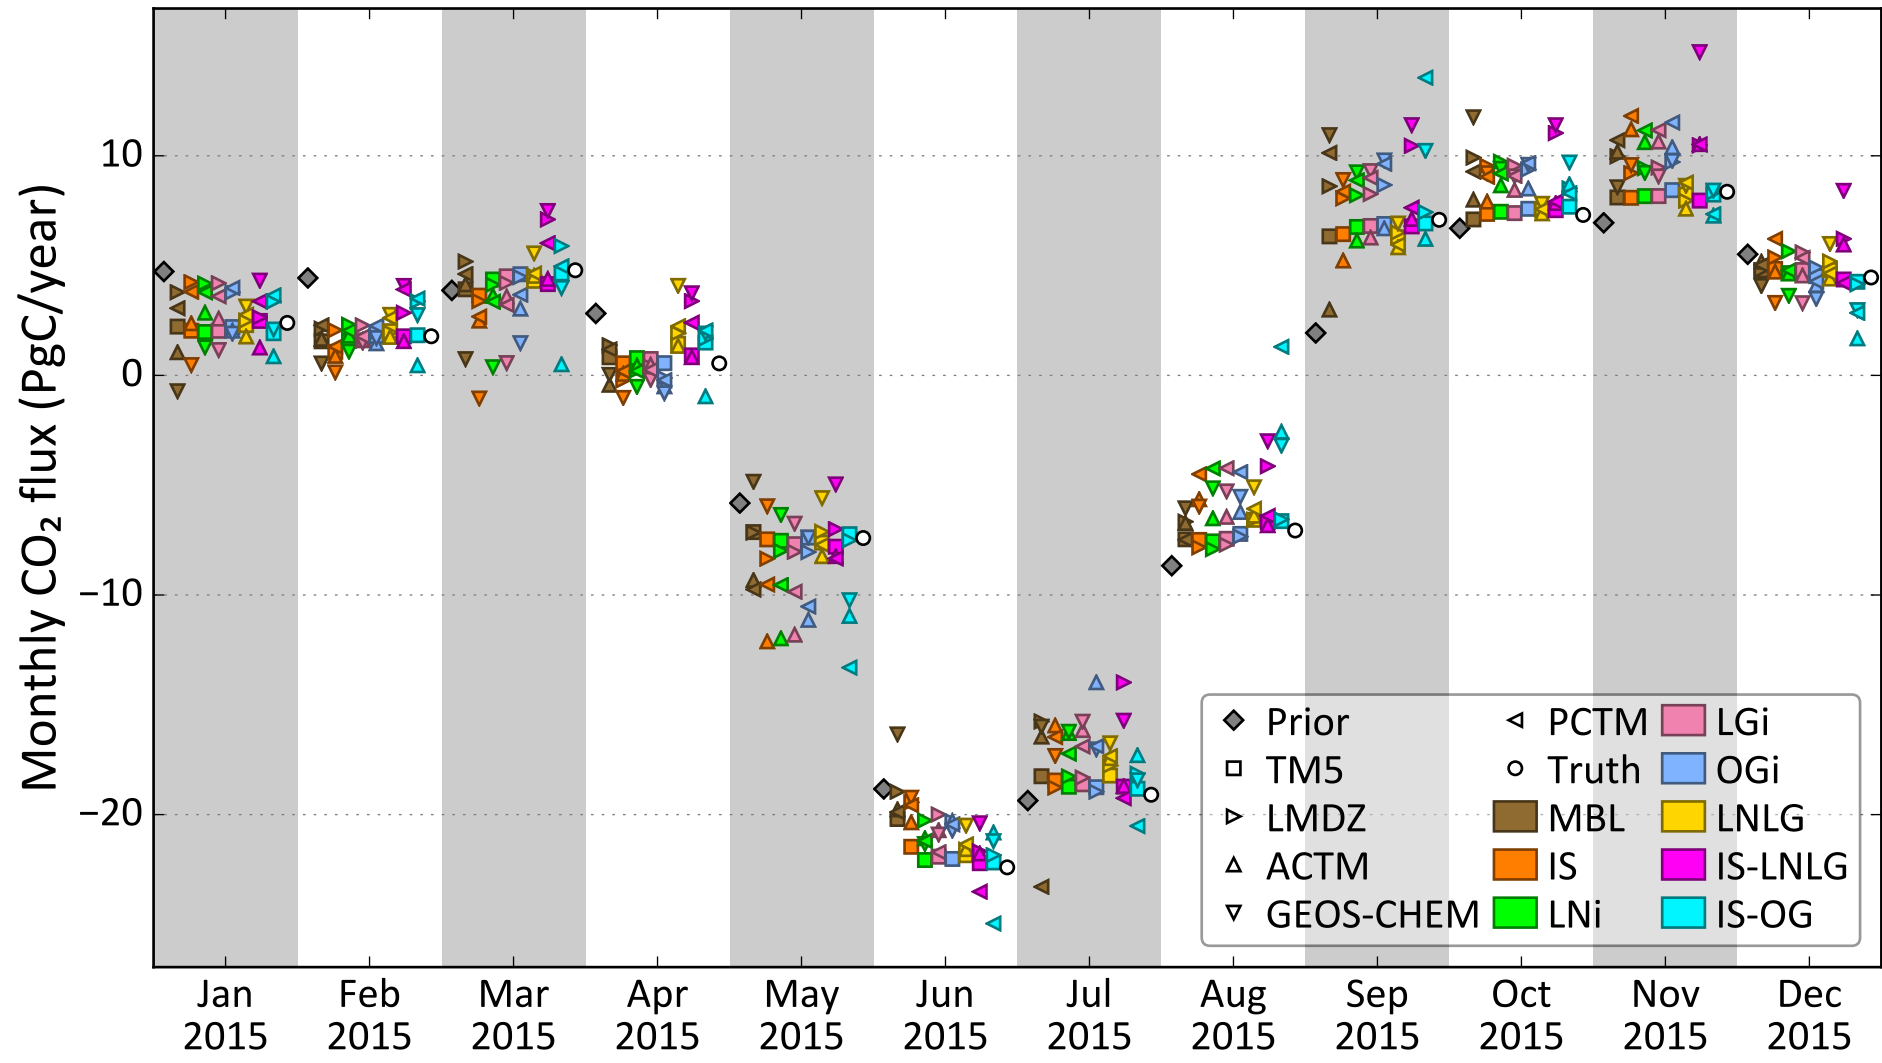

# Terrestrial CO<sub>2</sub> flux from Africa

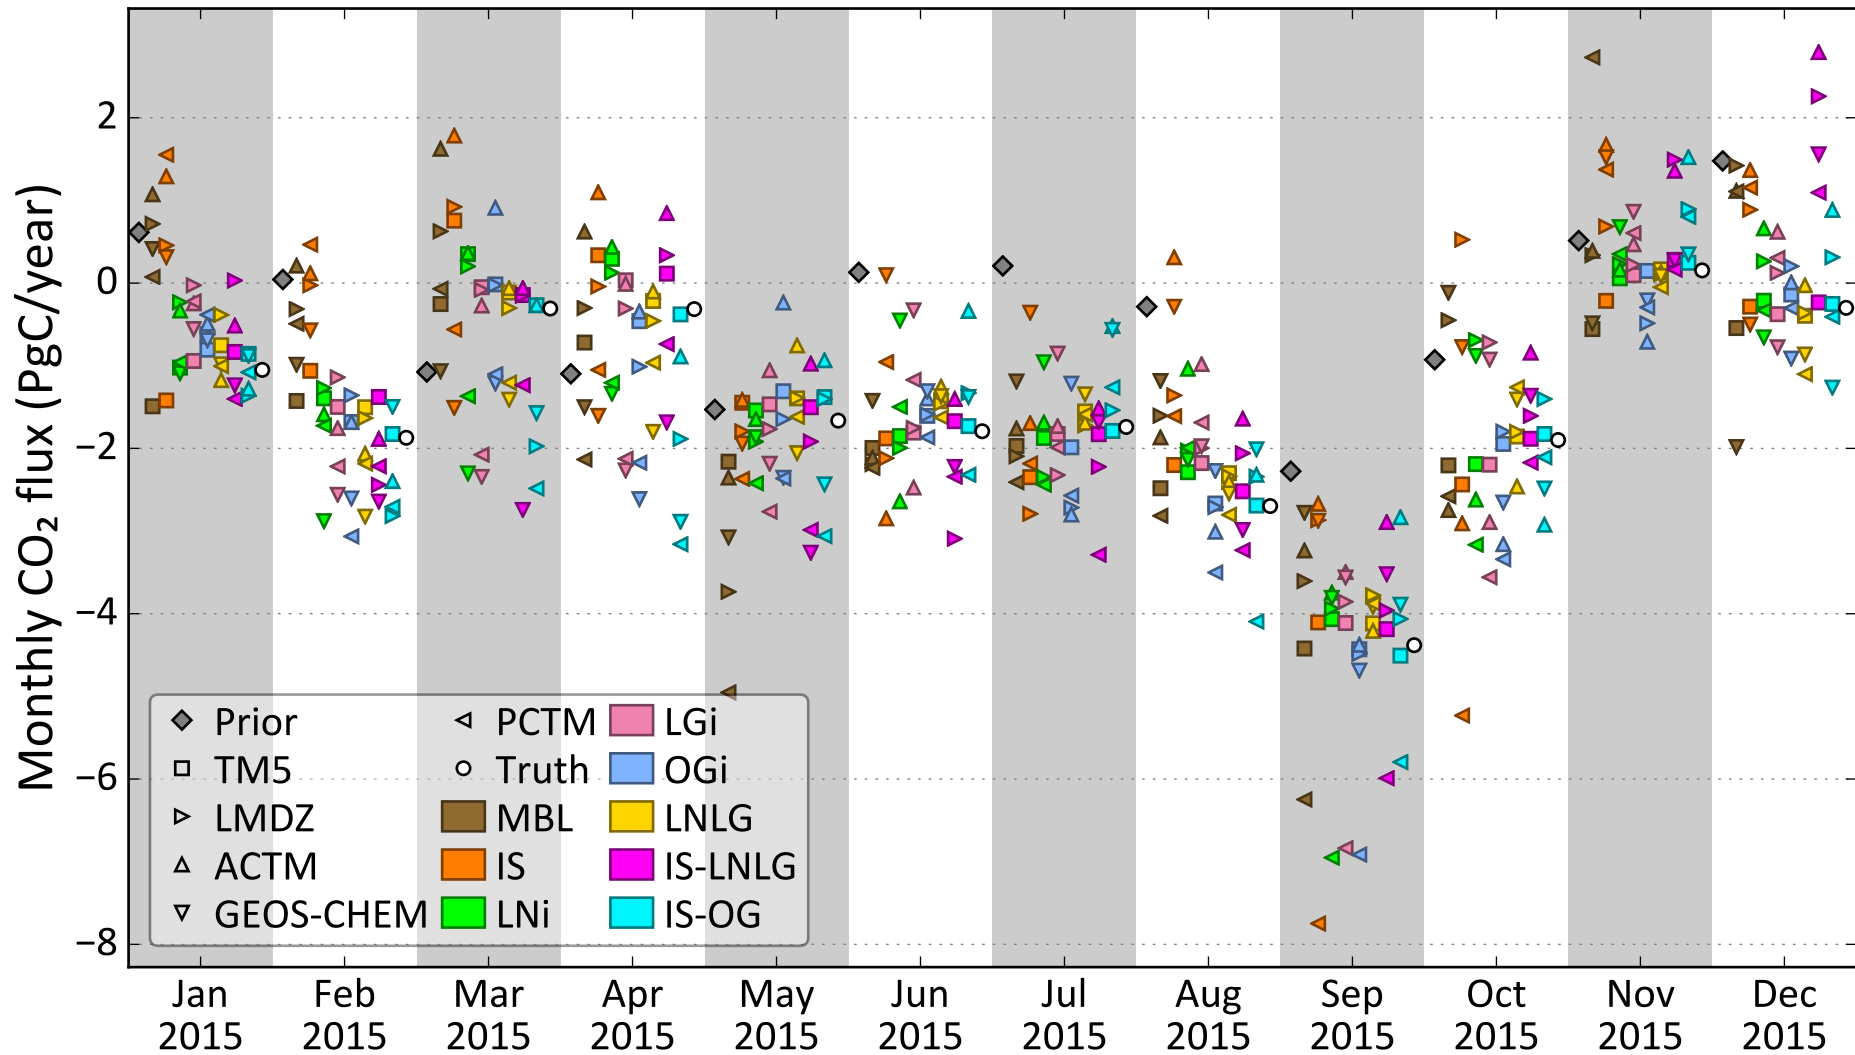

# Terrestrial CO<sub>2</sub> flux from Tropical Land

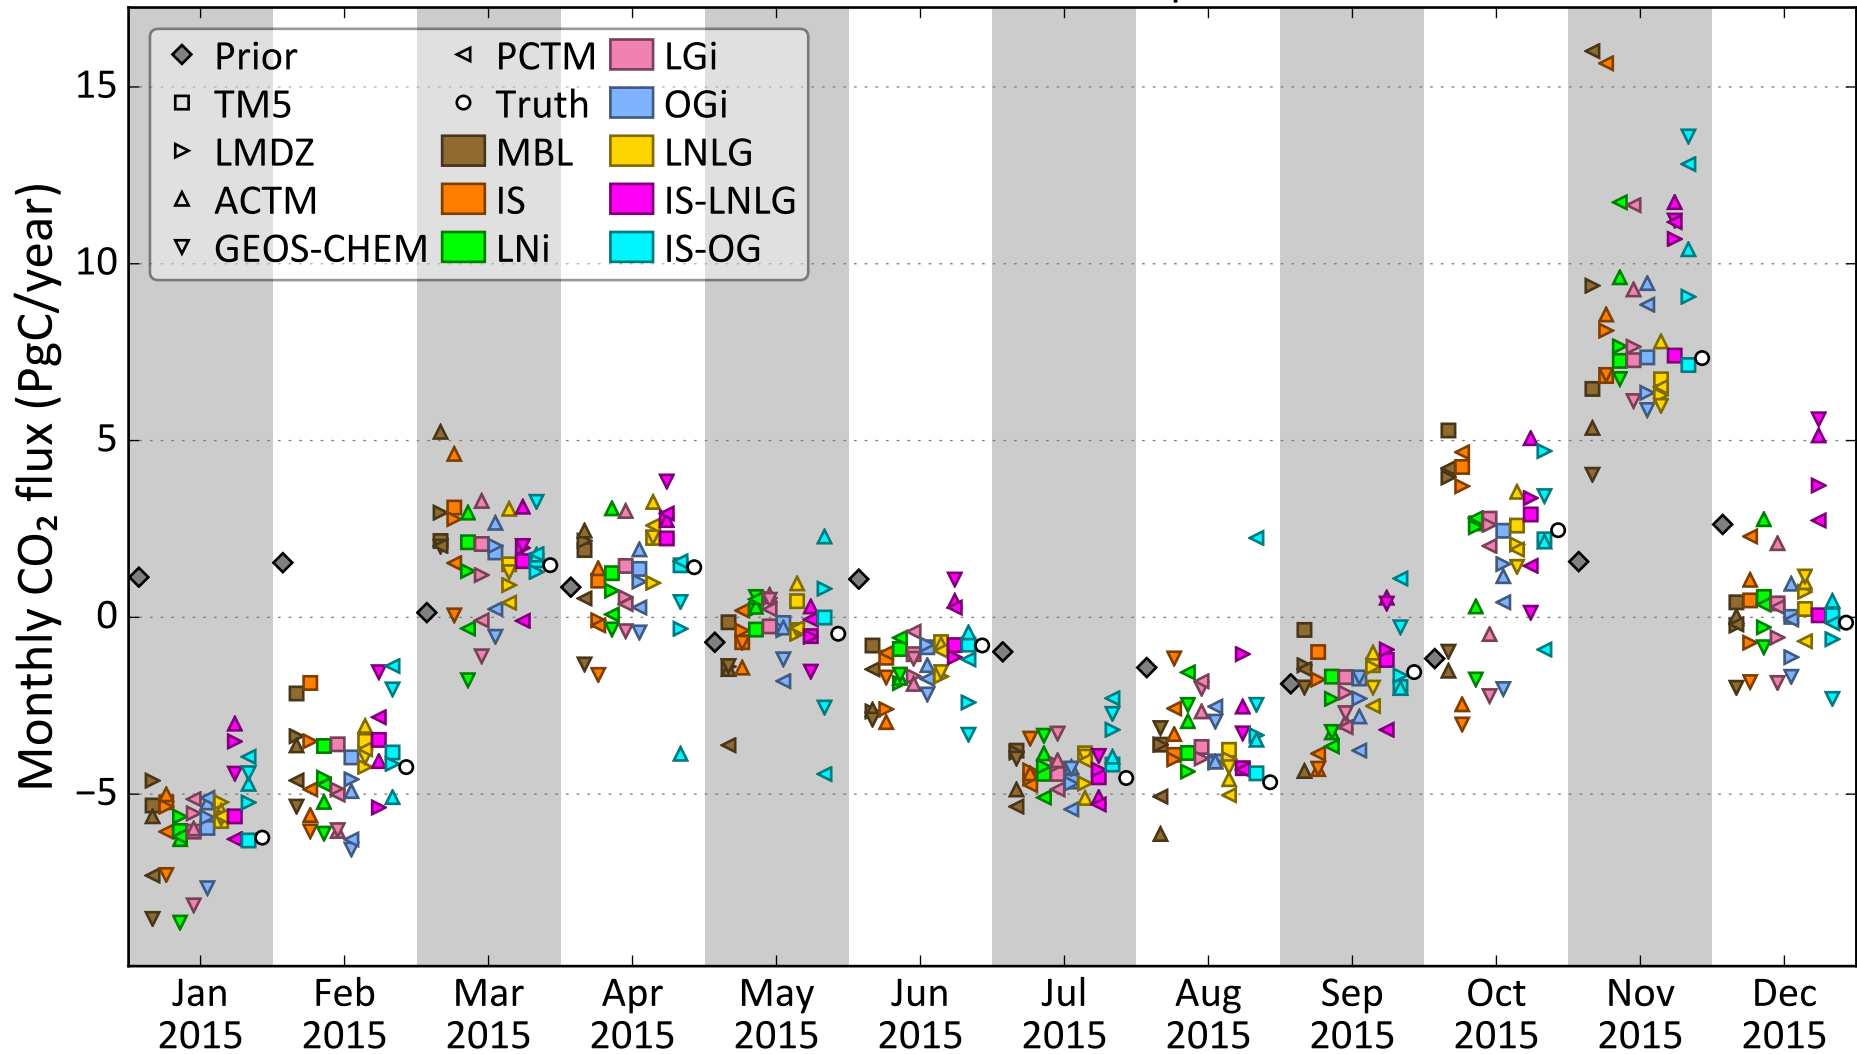

# Terrestrial CO<sub>2</sub> flux from Southern Extra-Tropical Land

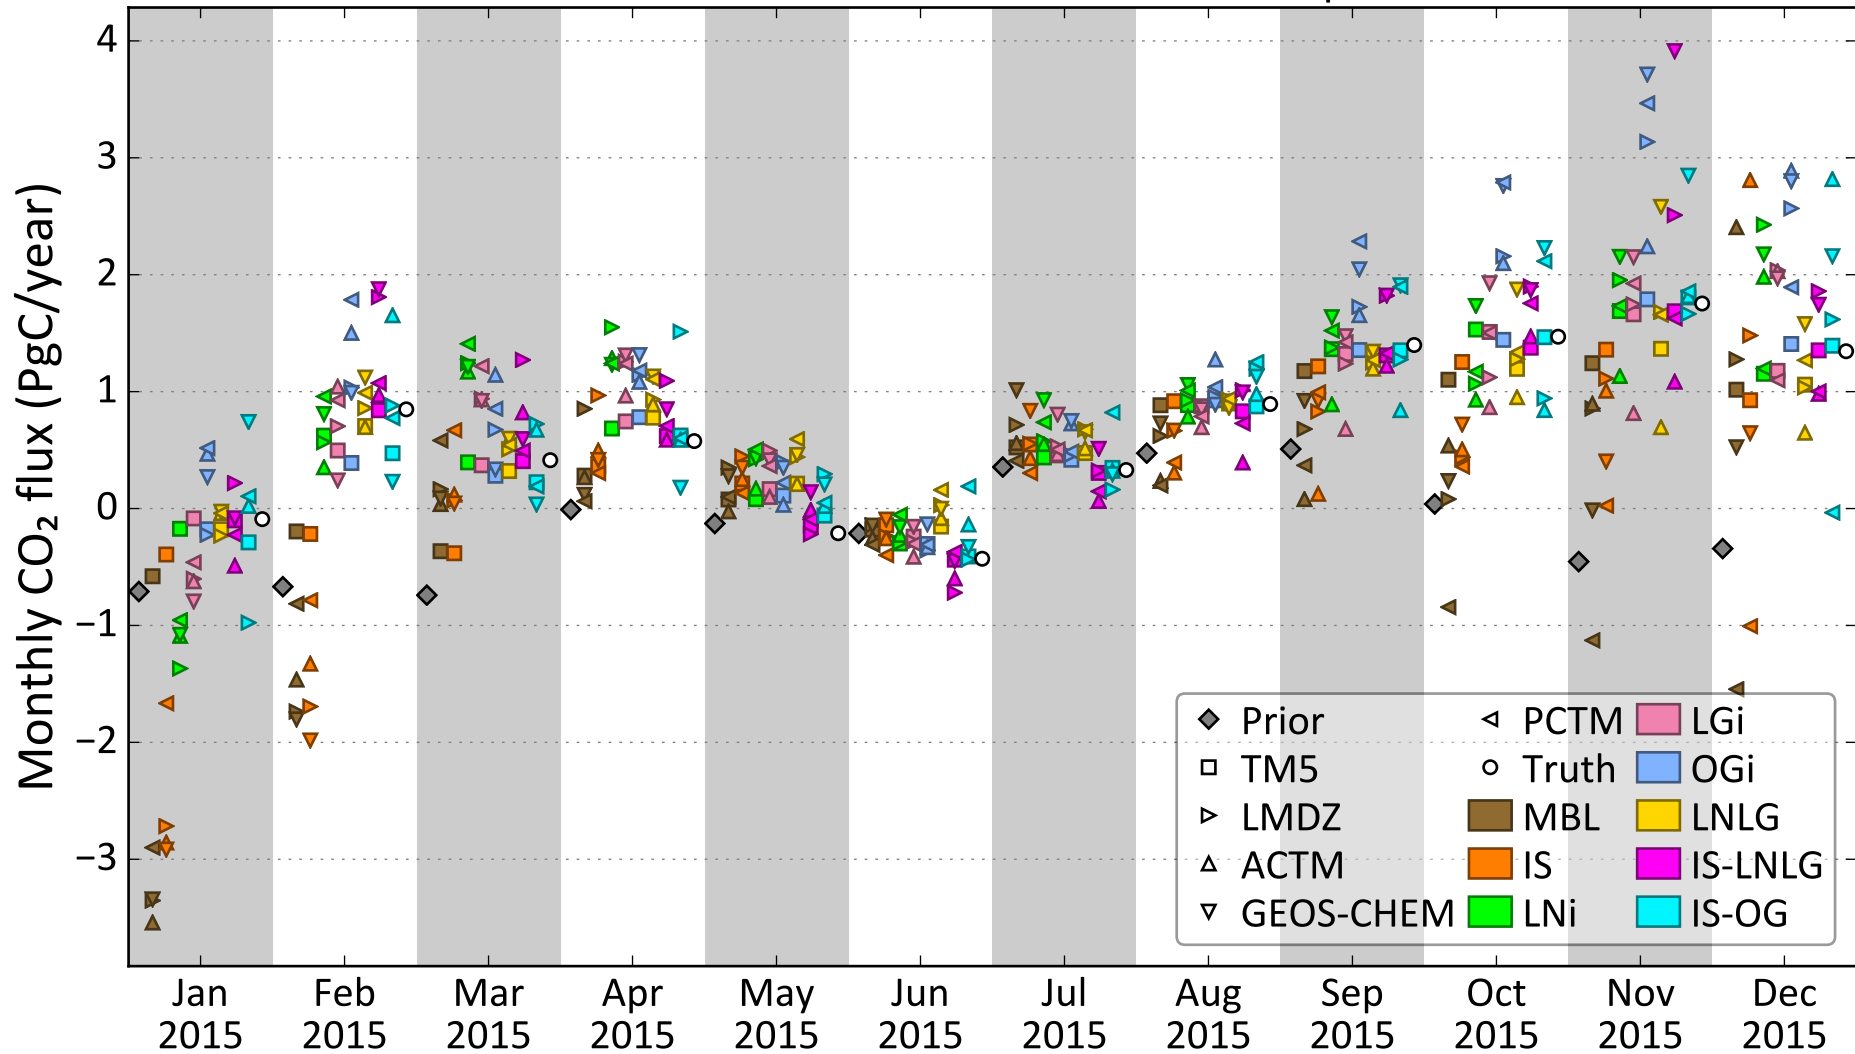

# Terrestrial CO<sub>2</sub> flux from Northern Extra-Tropical Land

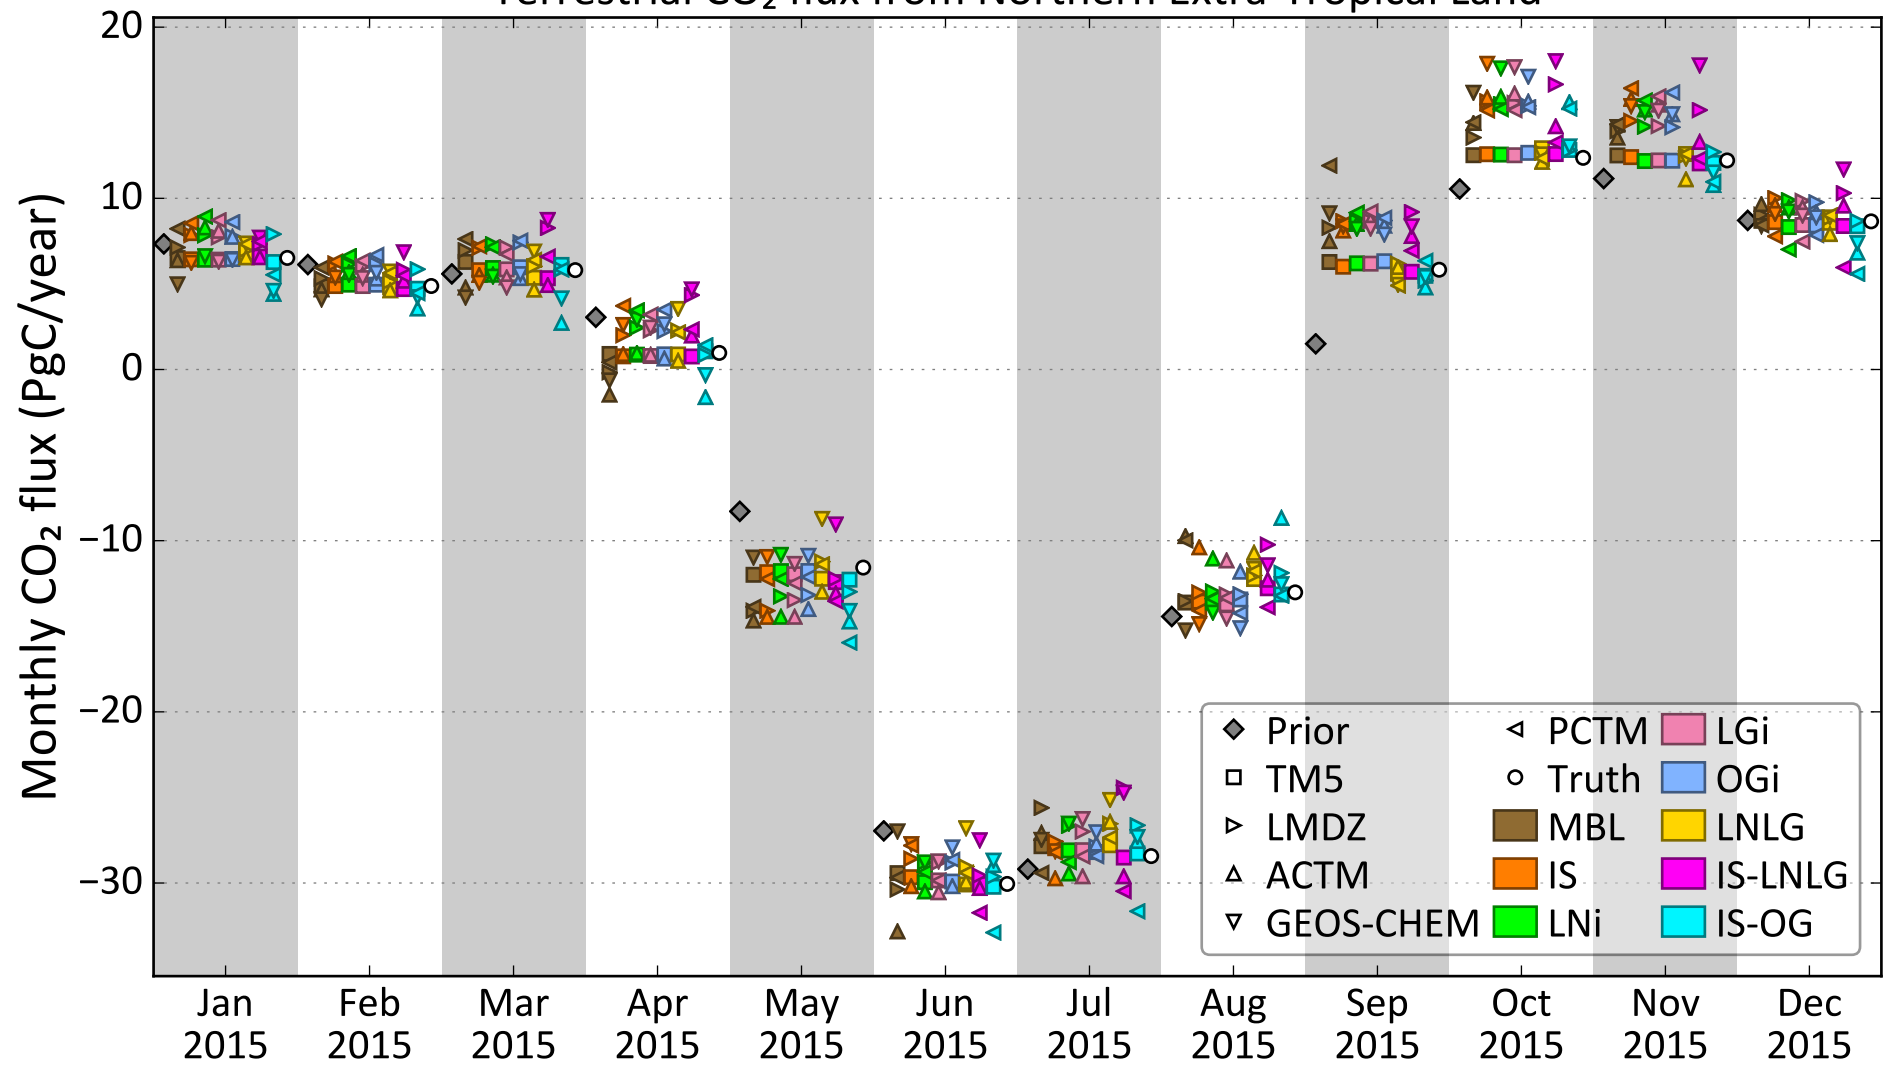

# Terrestrial CO<sub>2</sub> flux from Global Land

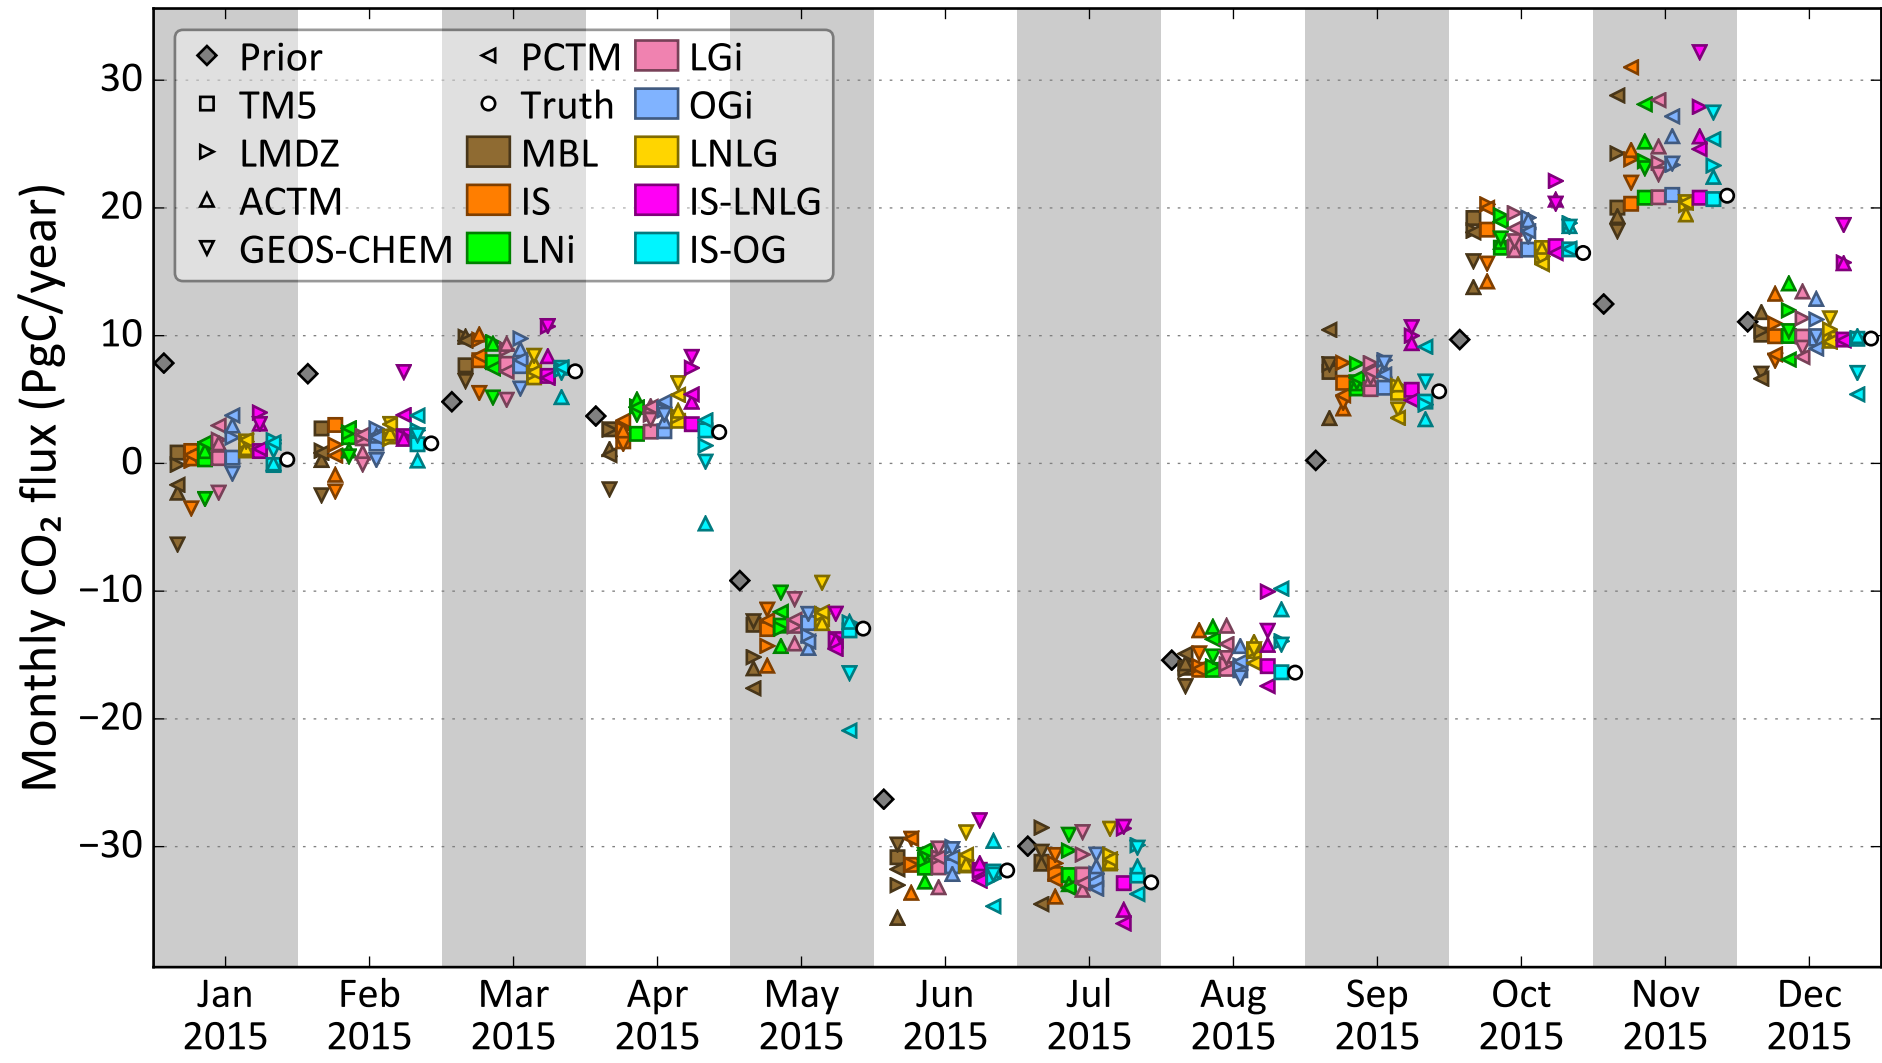

# Oceanic CO<sub>2</sub> flux from Atlantic Tropics

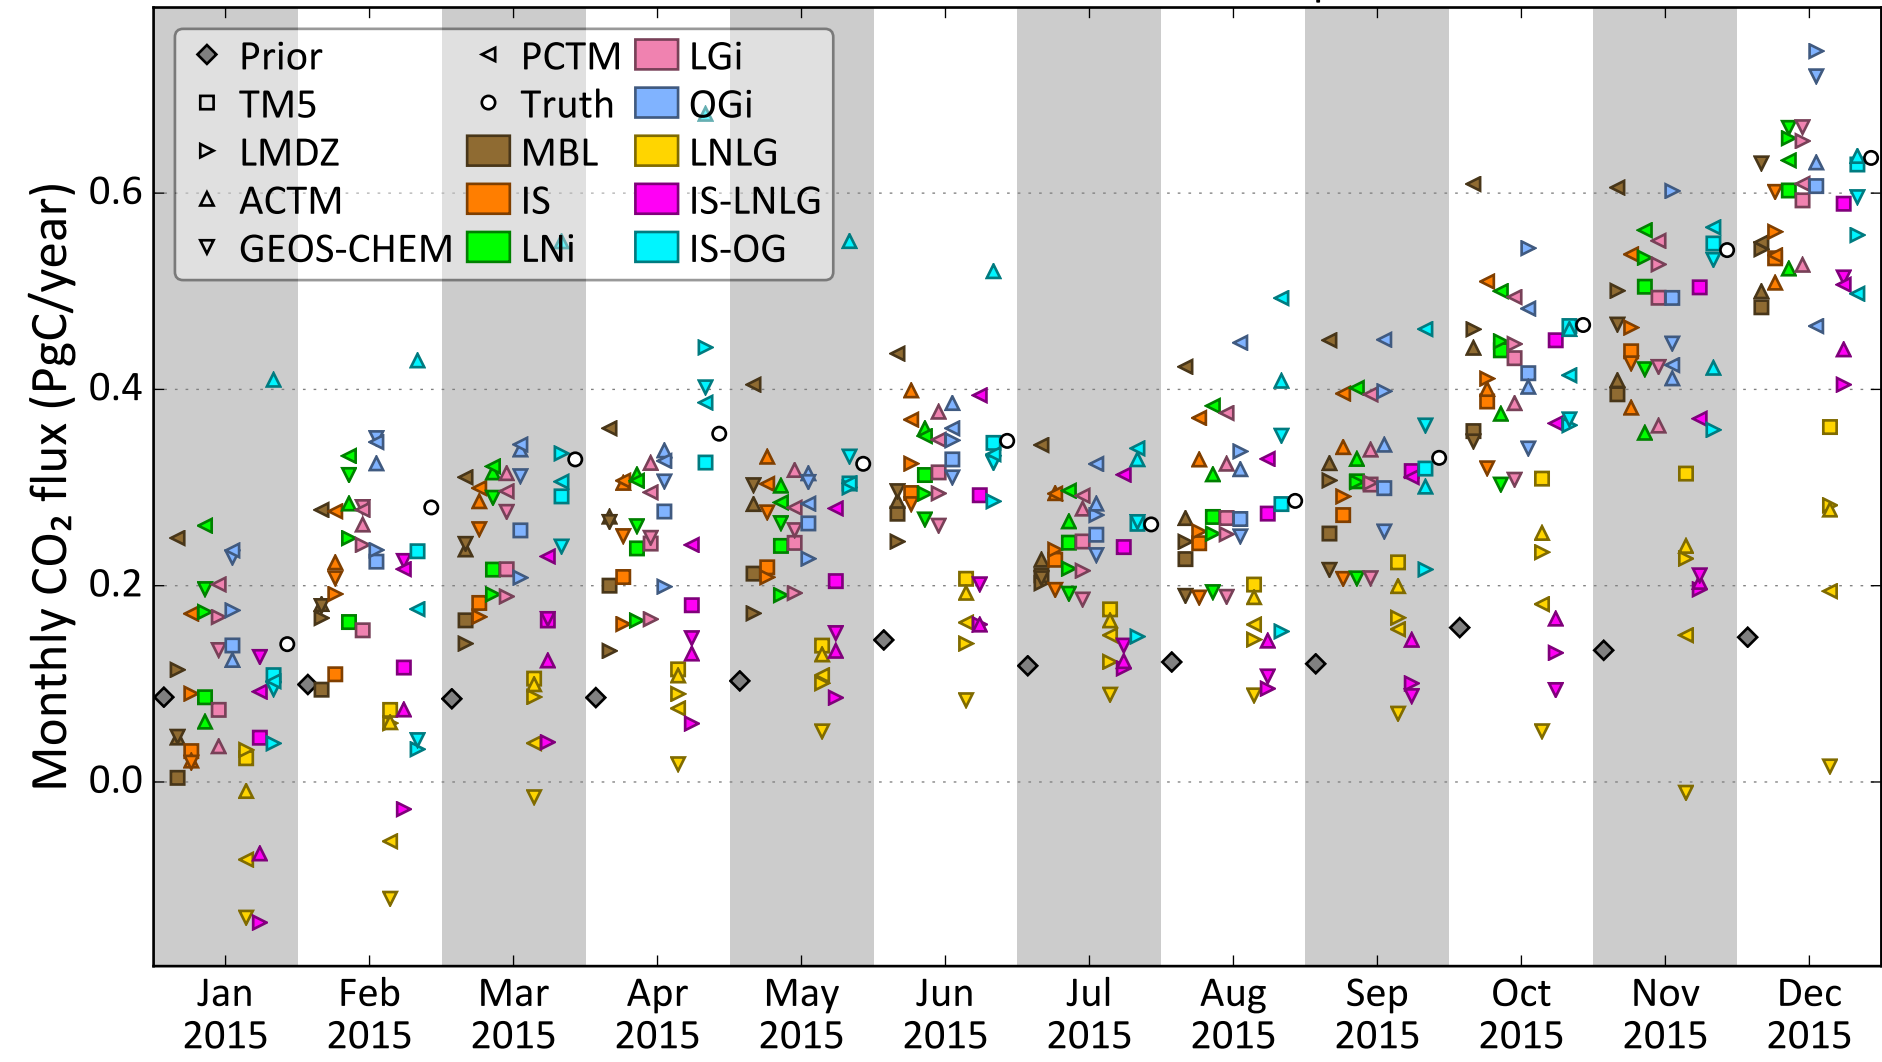

# Oceanic CO<sub>2</sub> flux from East Pacific Tropics

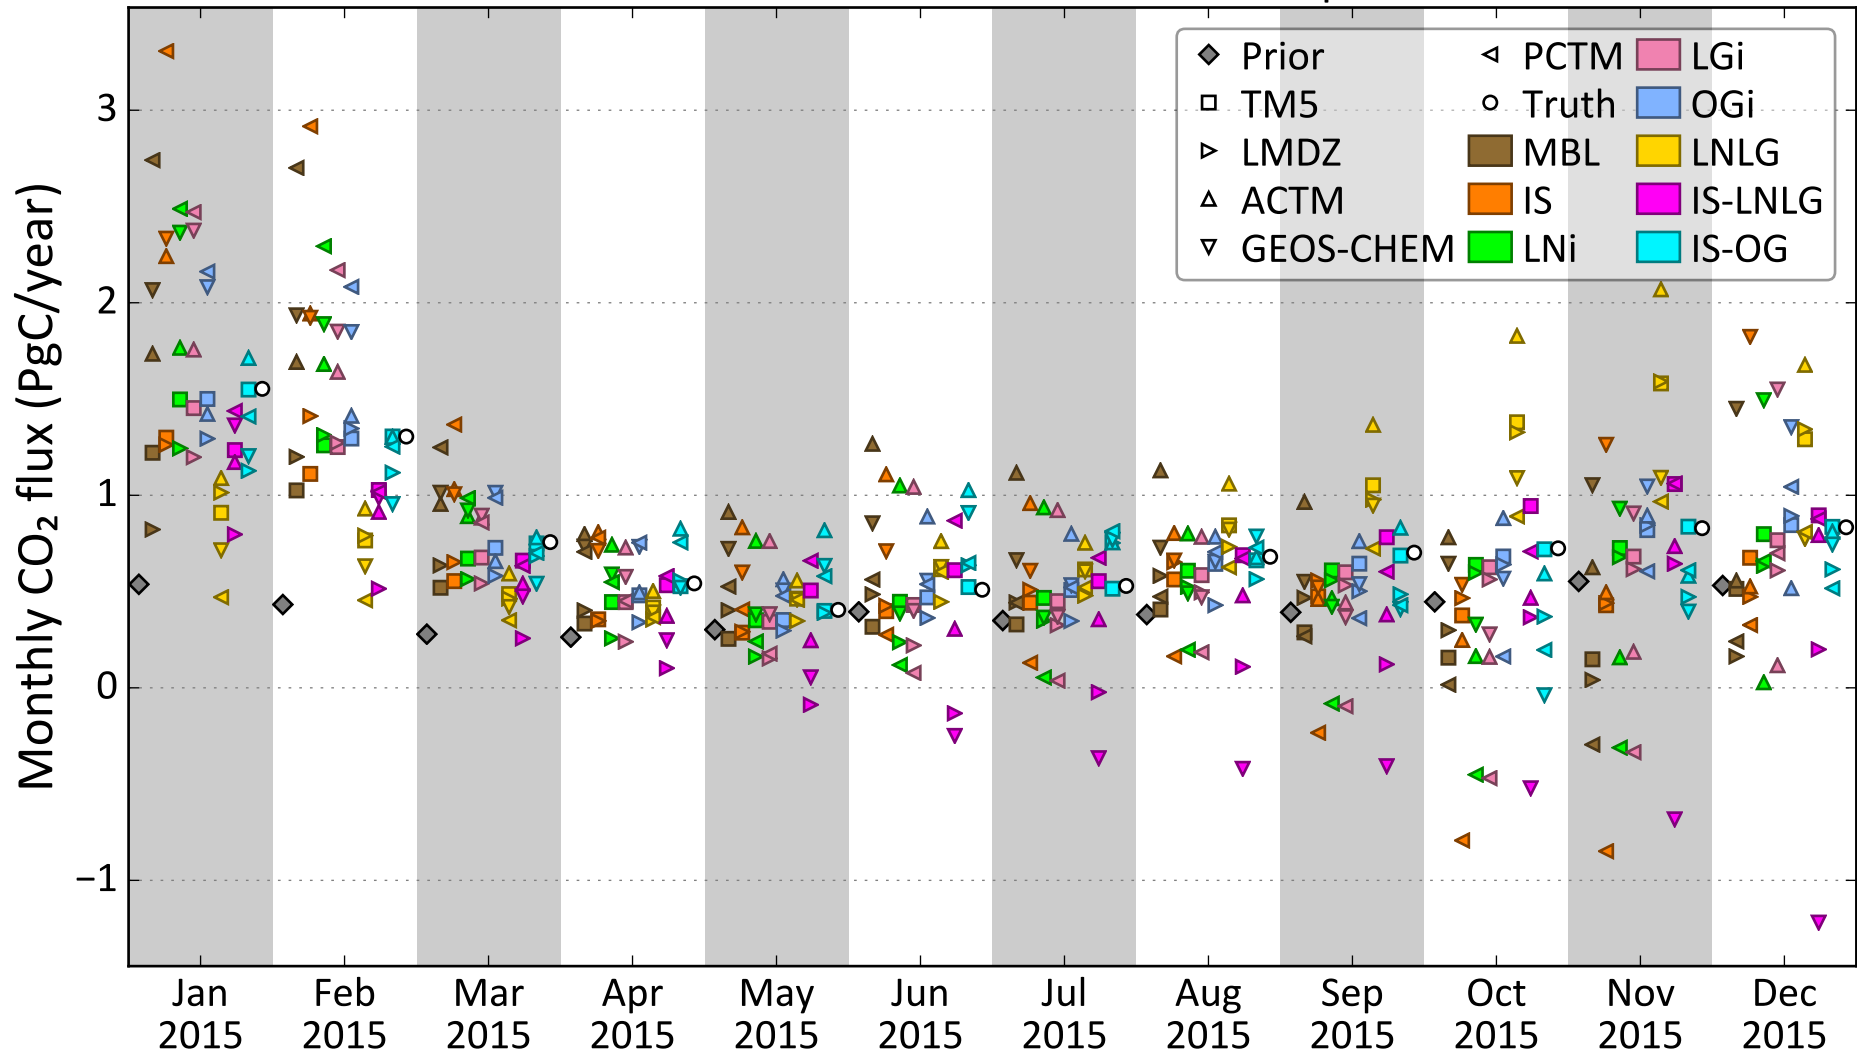

# Oceanic CO<sub>2</sub> flux from Indian Tropical

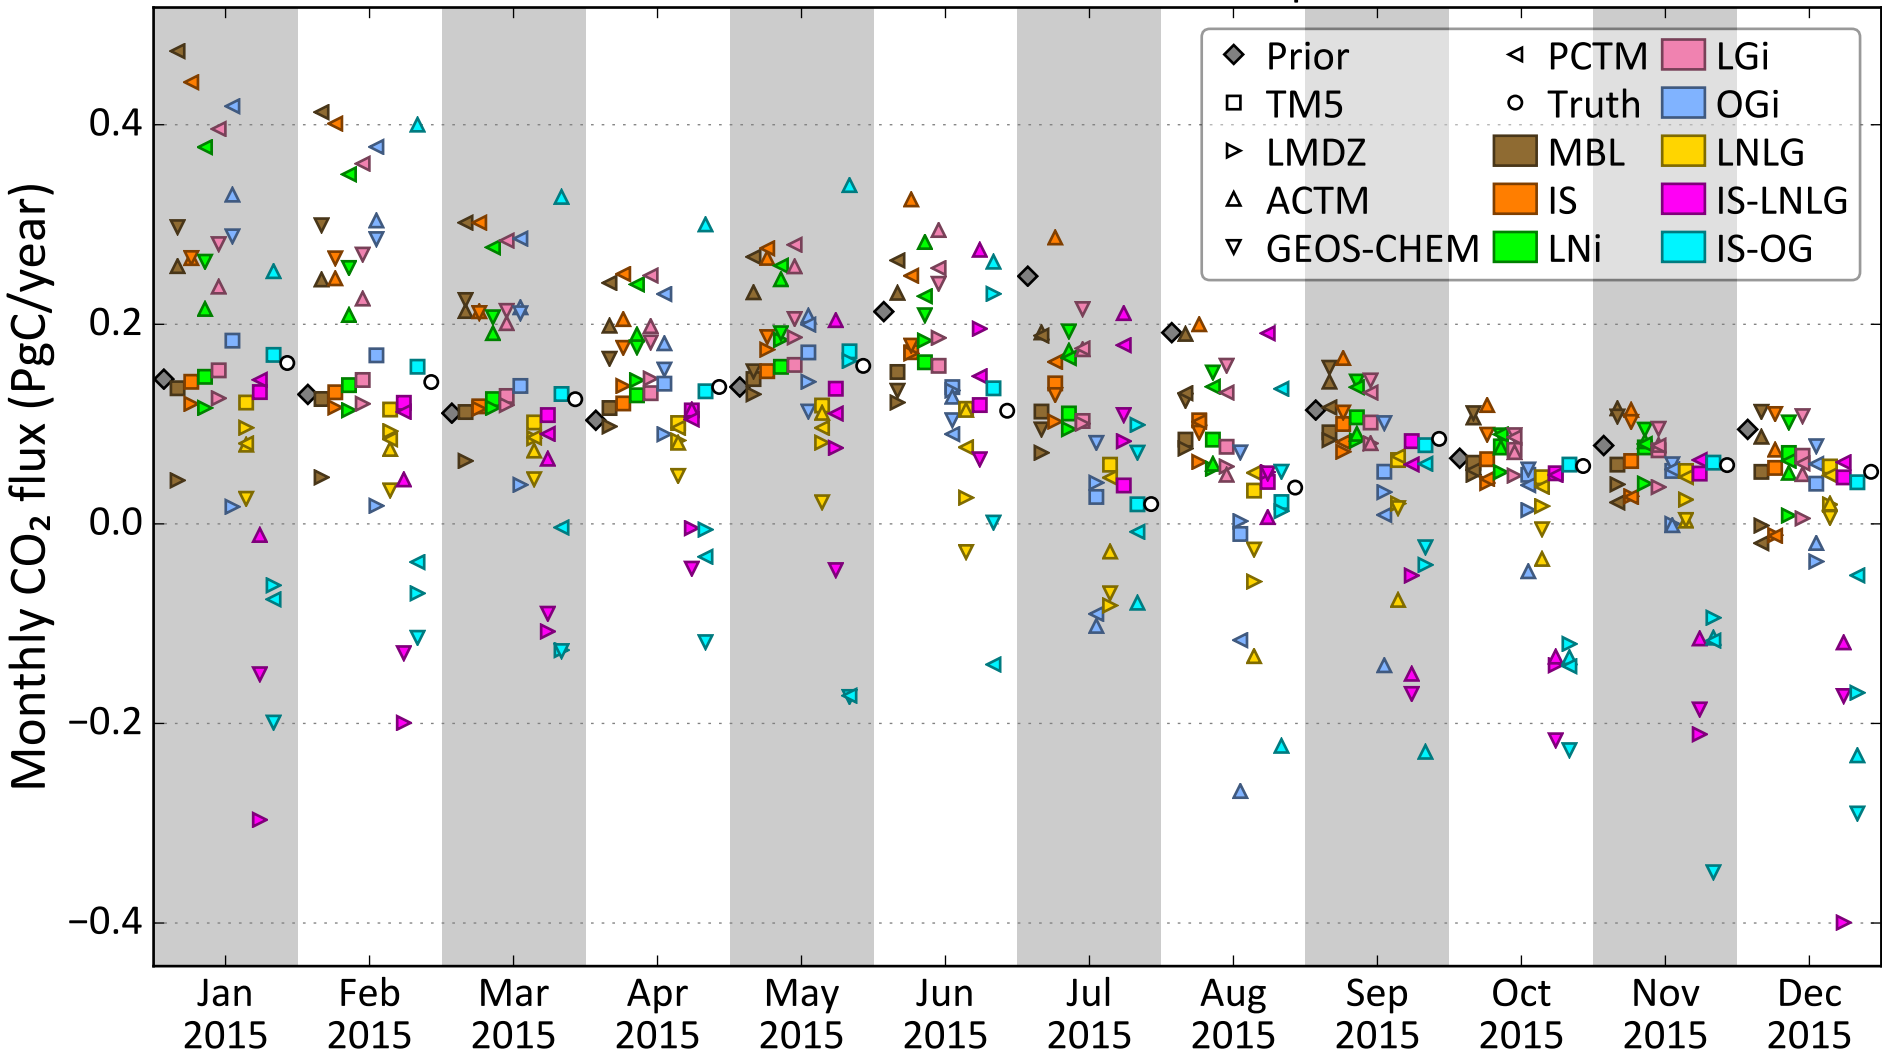

# Oceanic CO<sub>2</sub> flux from North Atlantic Temperate

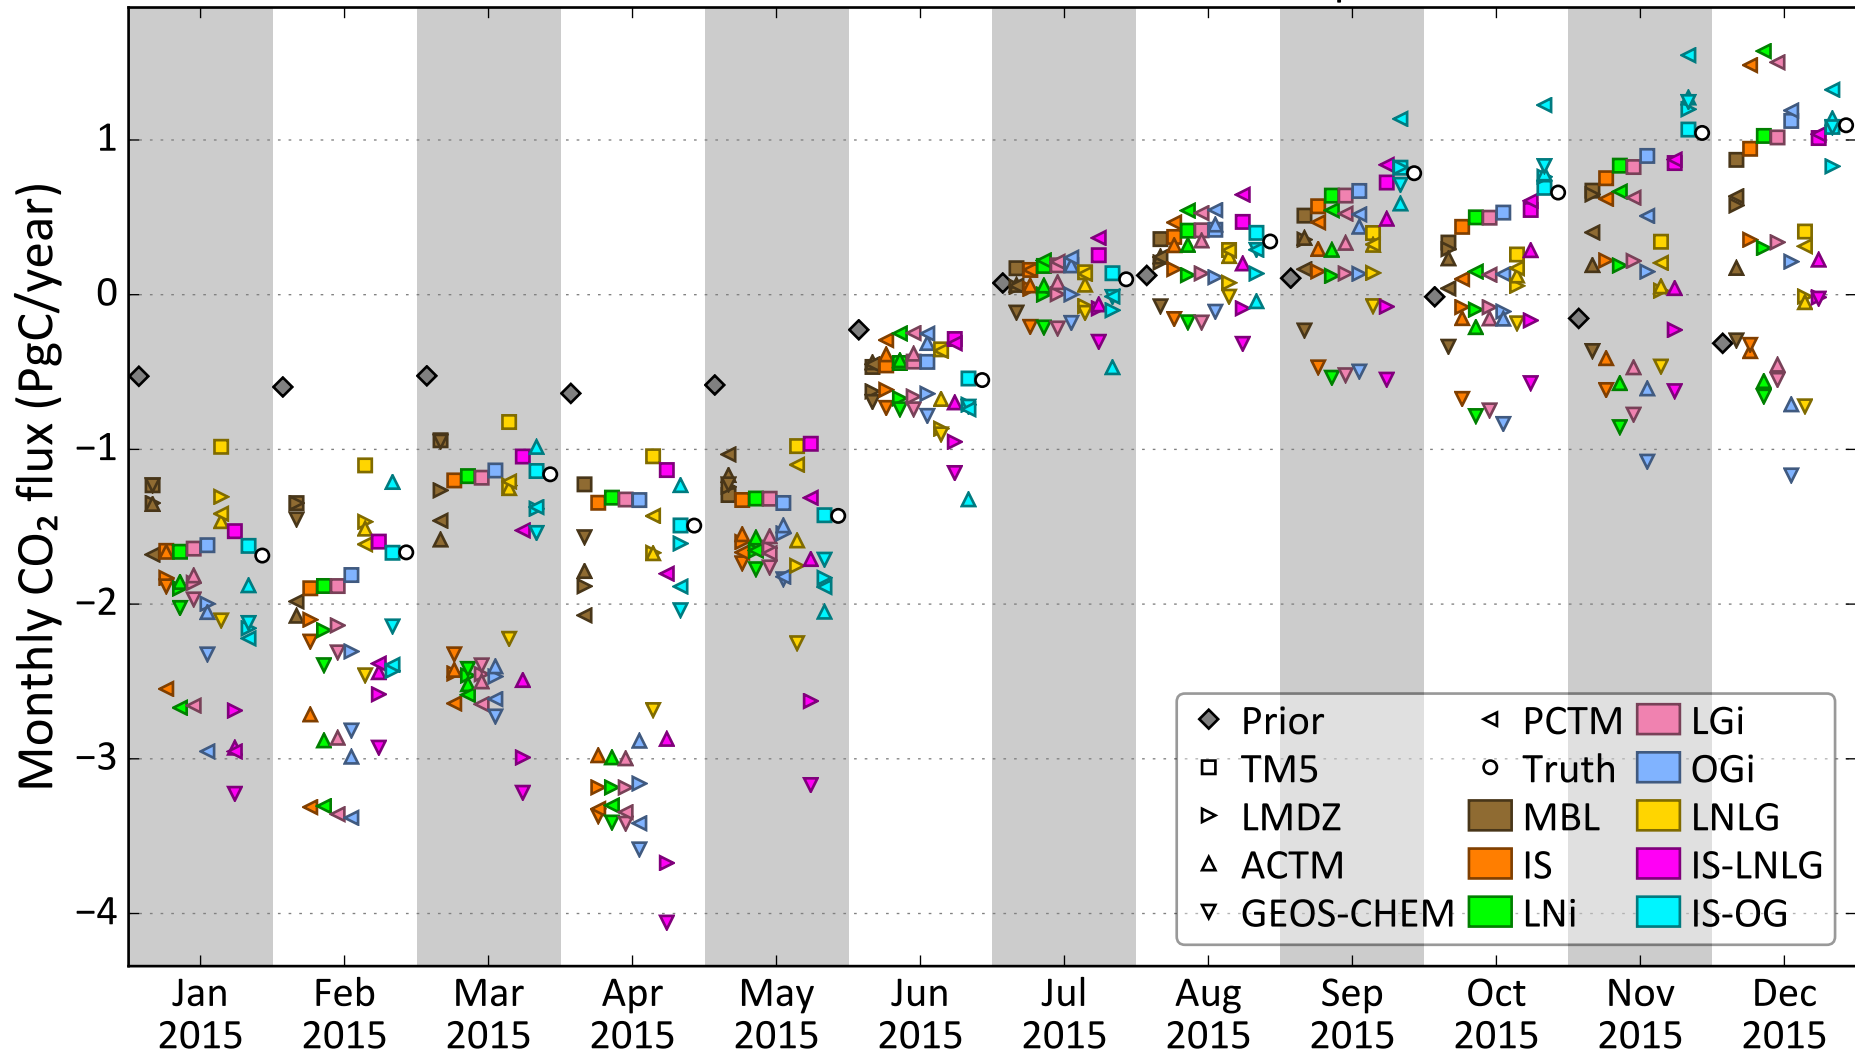

## Oceanic CO<sub>2</sub> flux from North Pacific Temperate

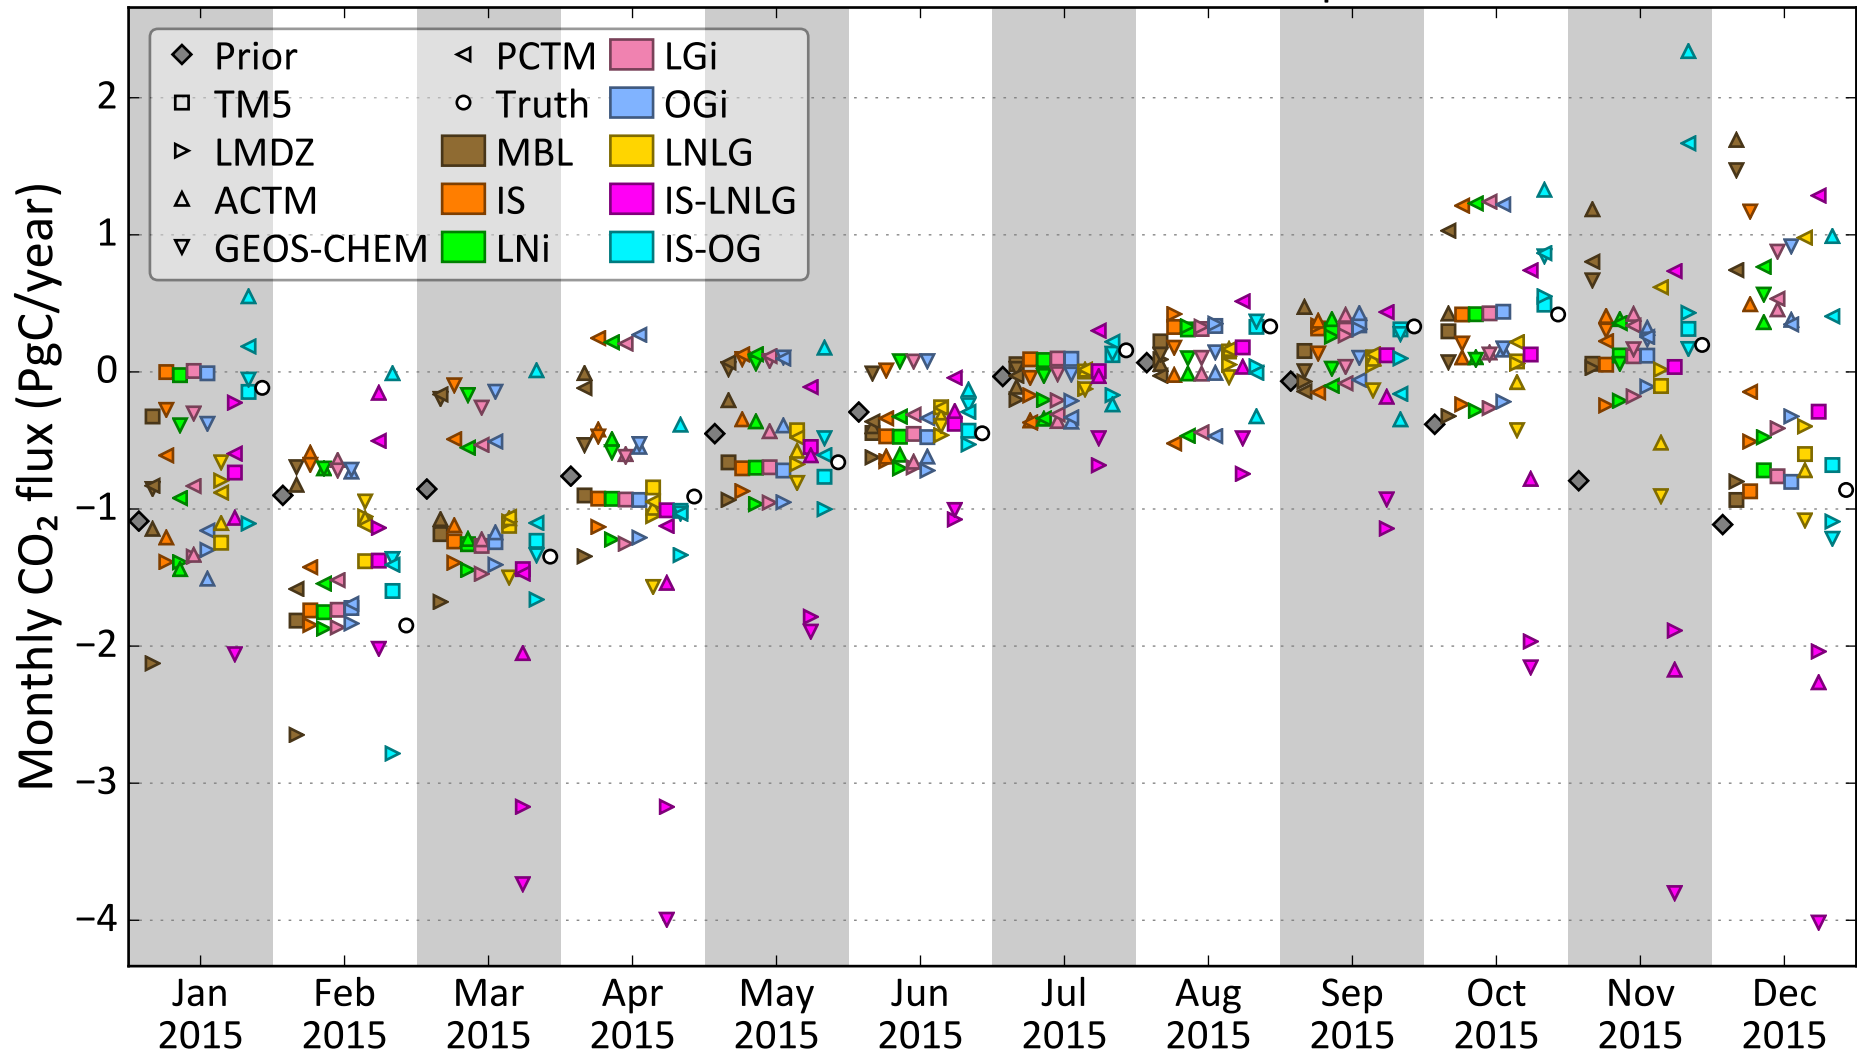

# Oceanic CO<sub>2</sub> flux from Northern Ocean

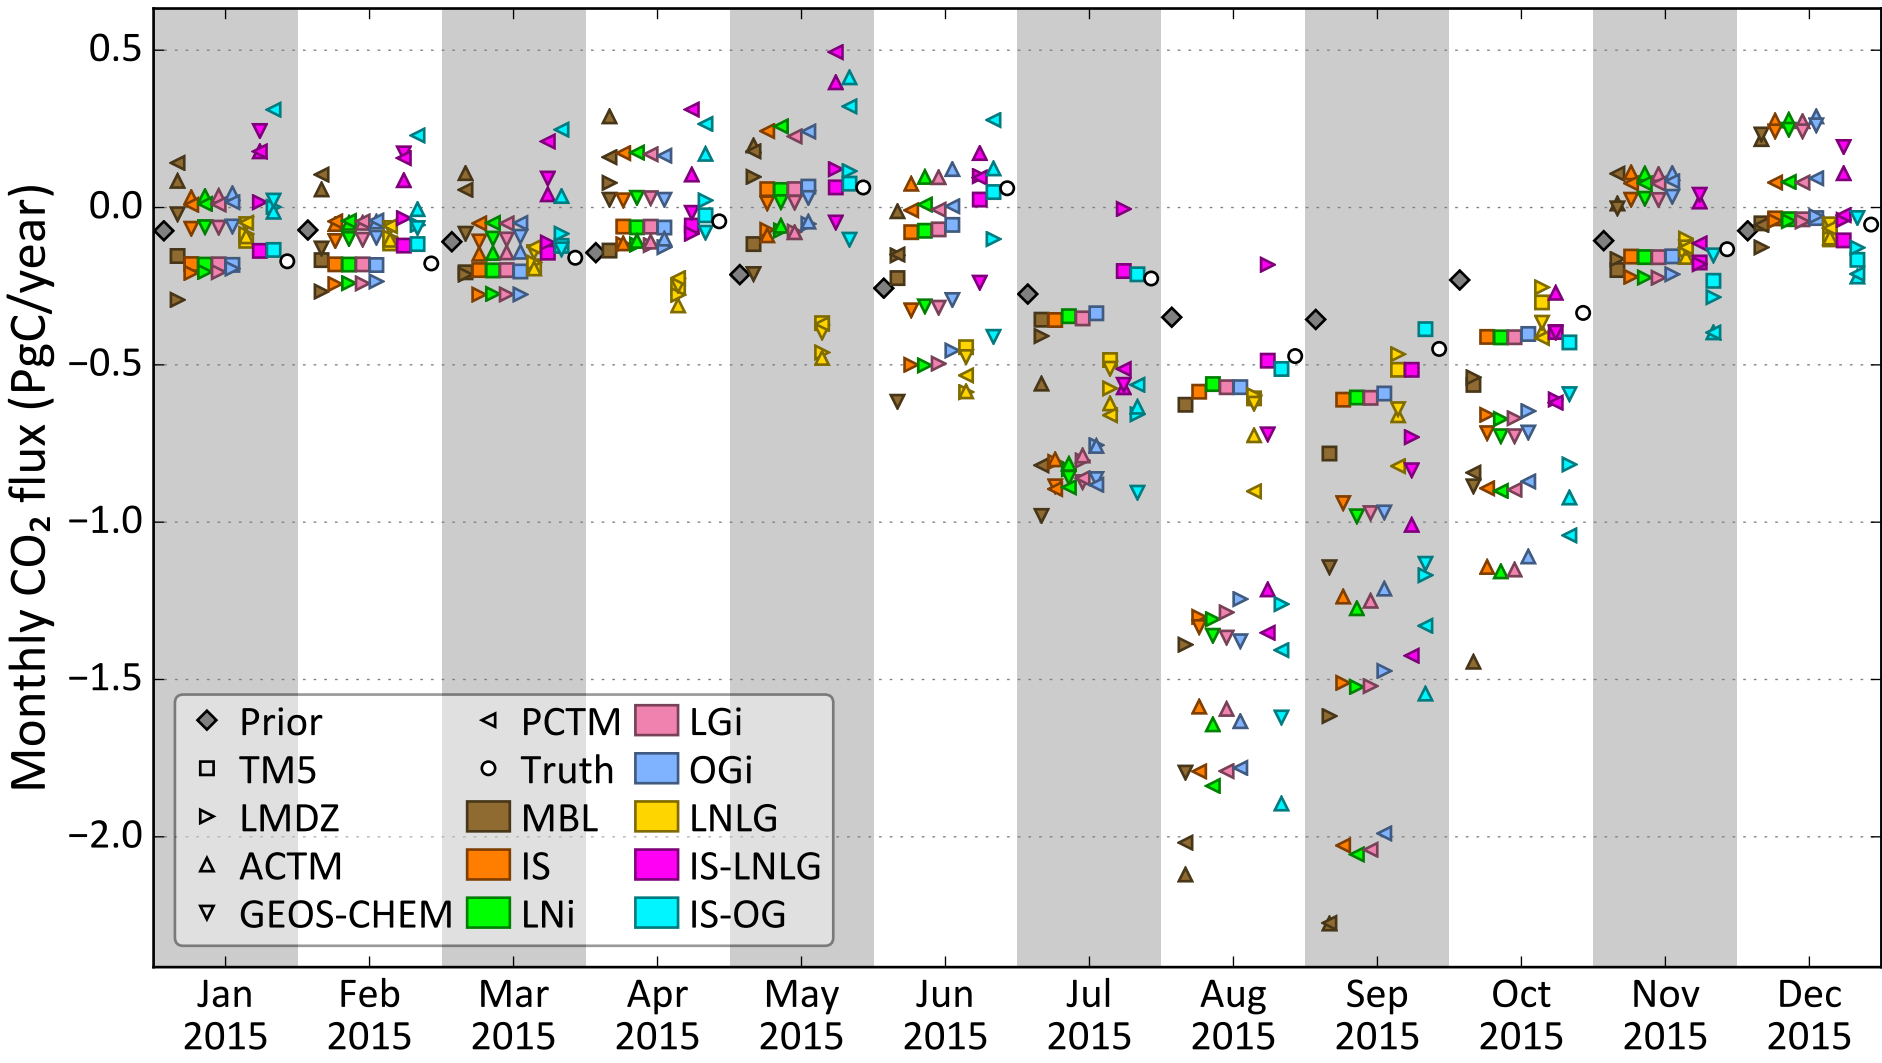

# Oceanic CO<sub>2</sub> flux from South Atlantic Temperate

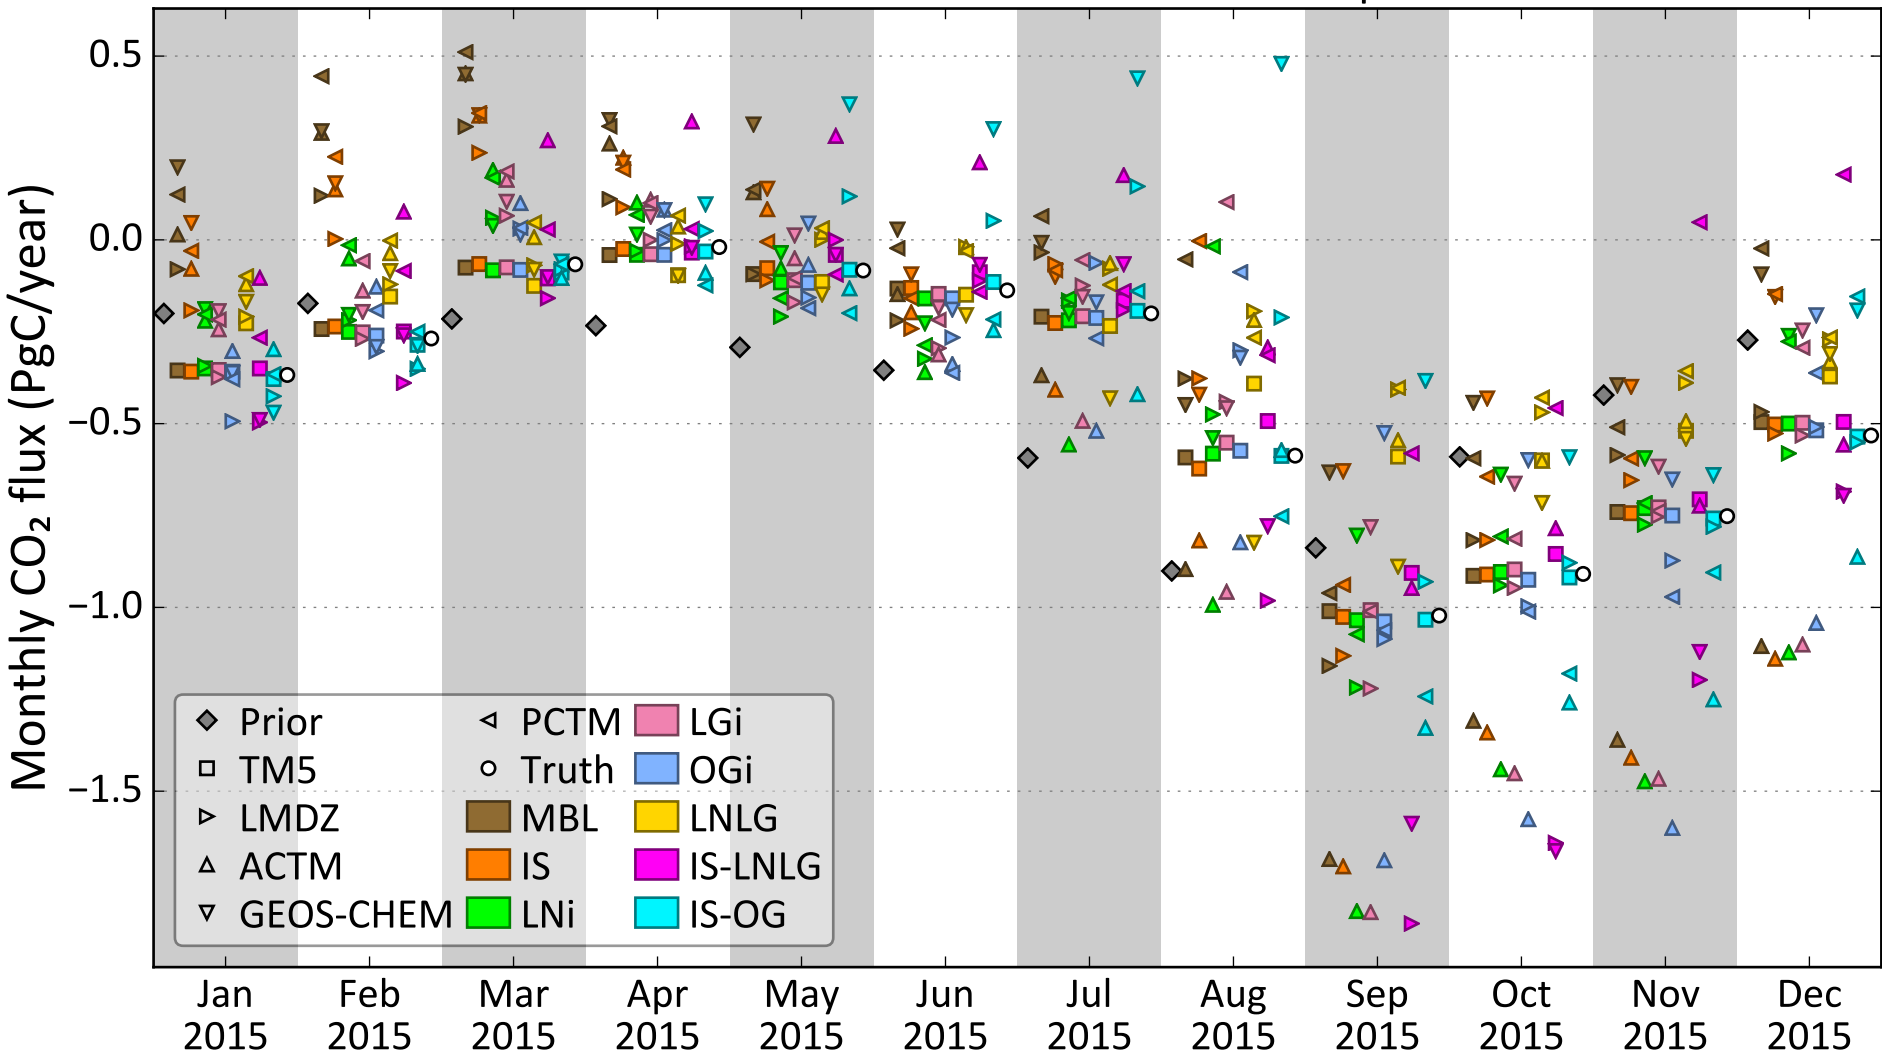

# Oceanic CO<sub>2</sub> flux from South Indian Temperate

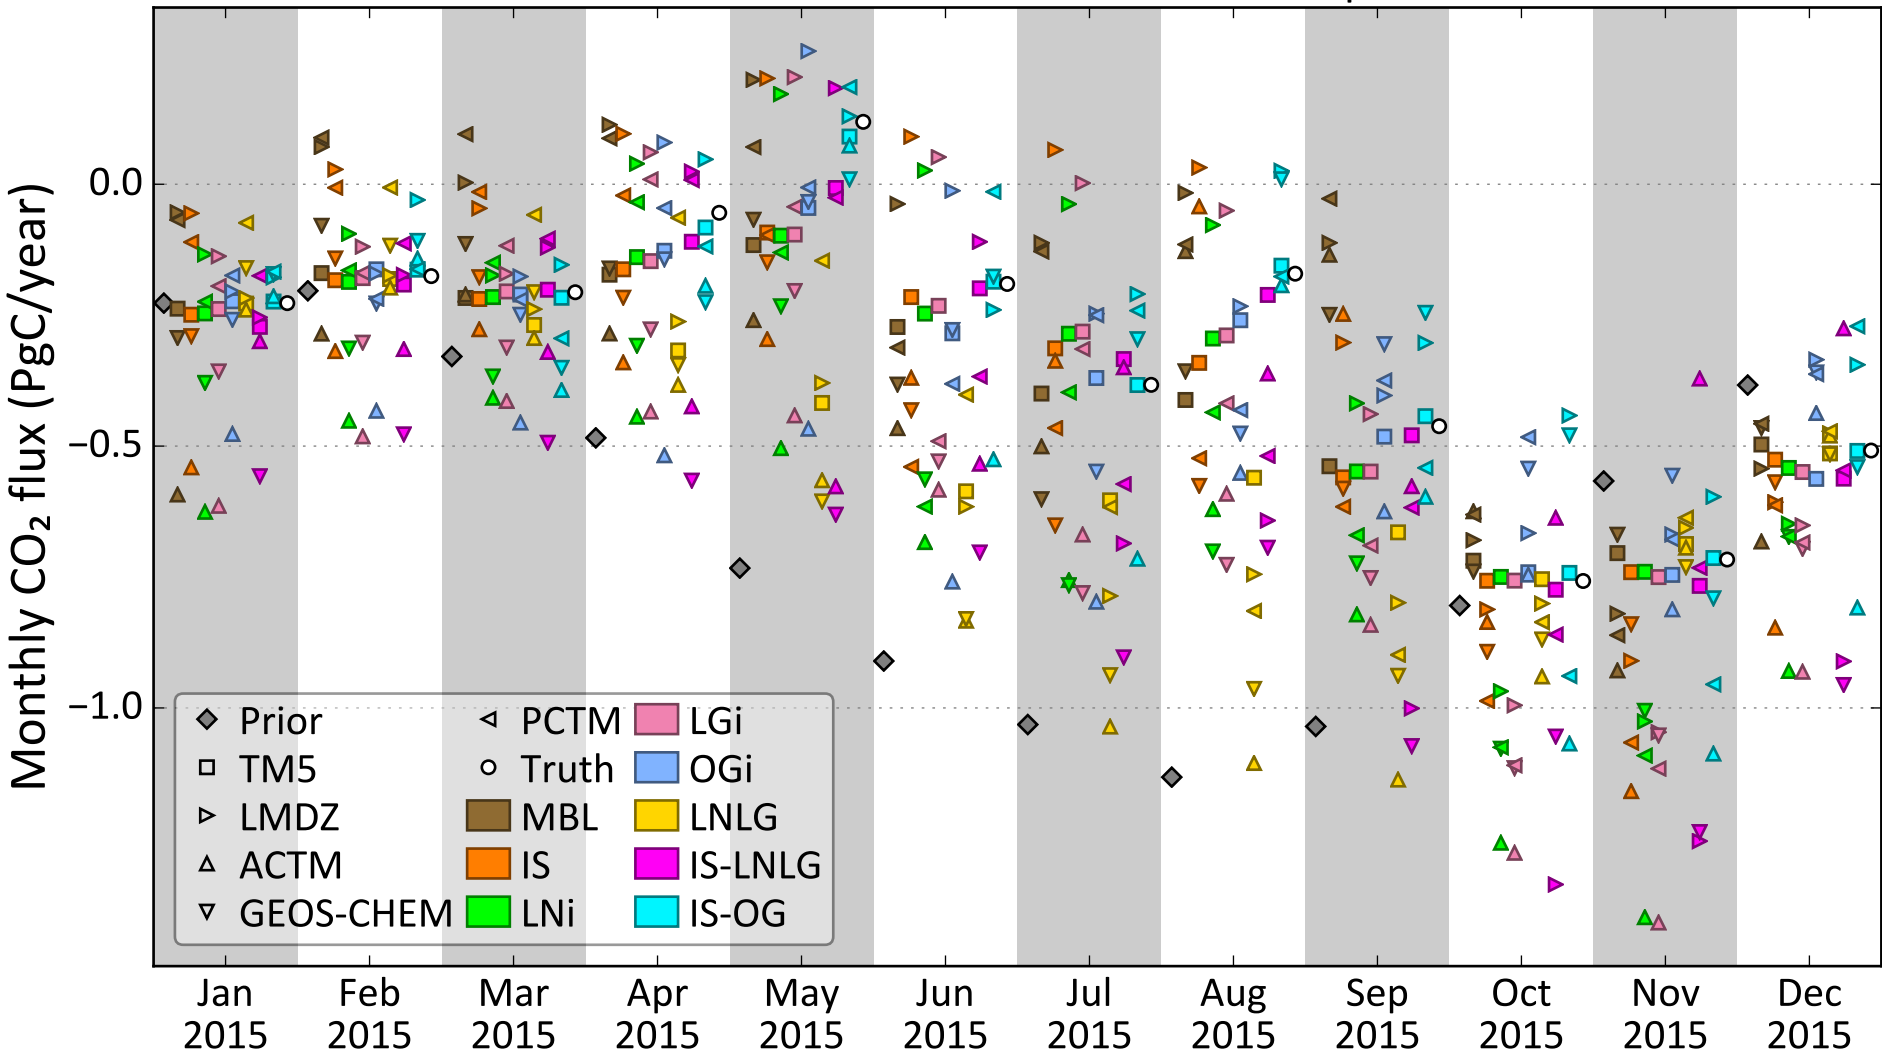

# Oceanic CO<sub>2</sub> flux from South Pacific Temperate

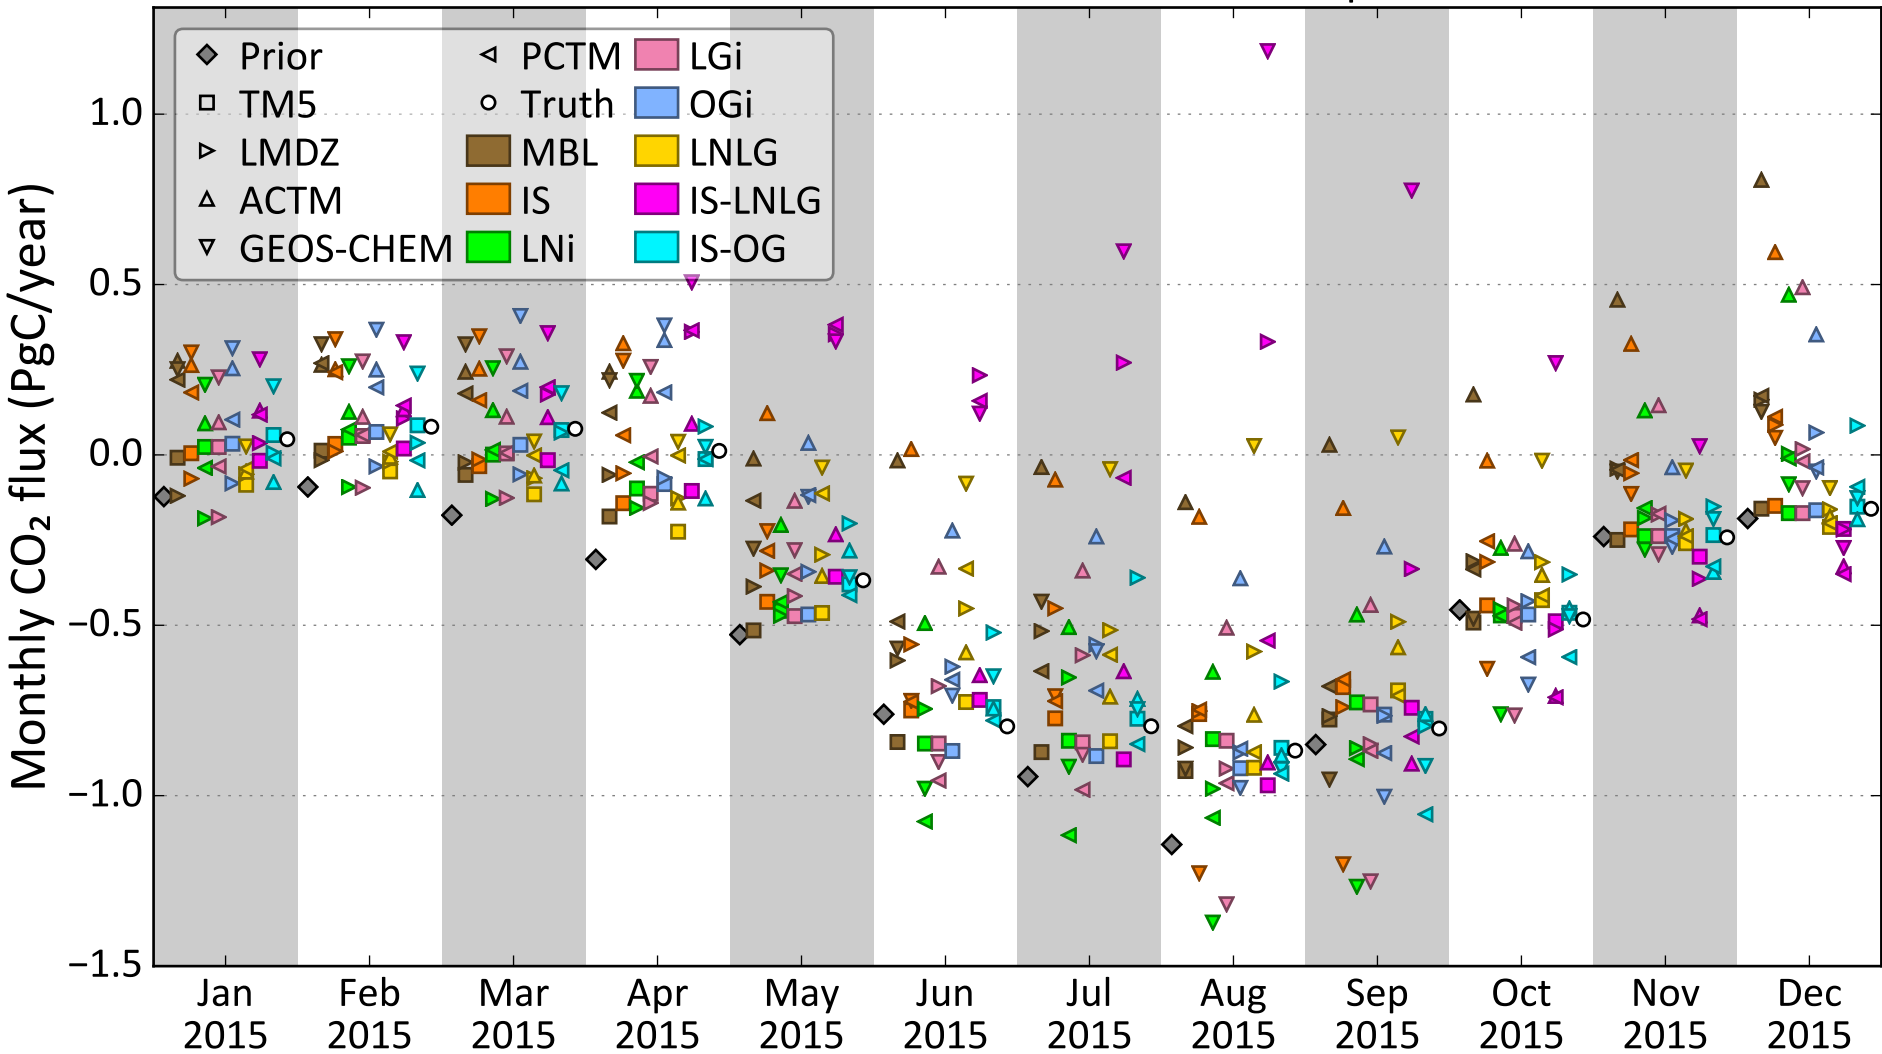

# Oceanic CO<sub>2</sub> flux from Southern Ocean

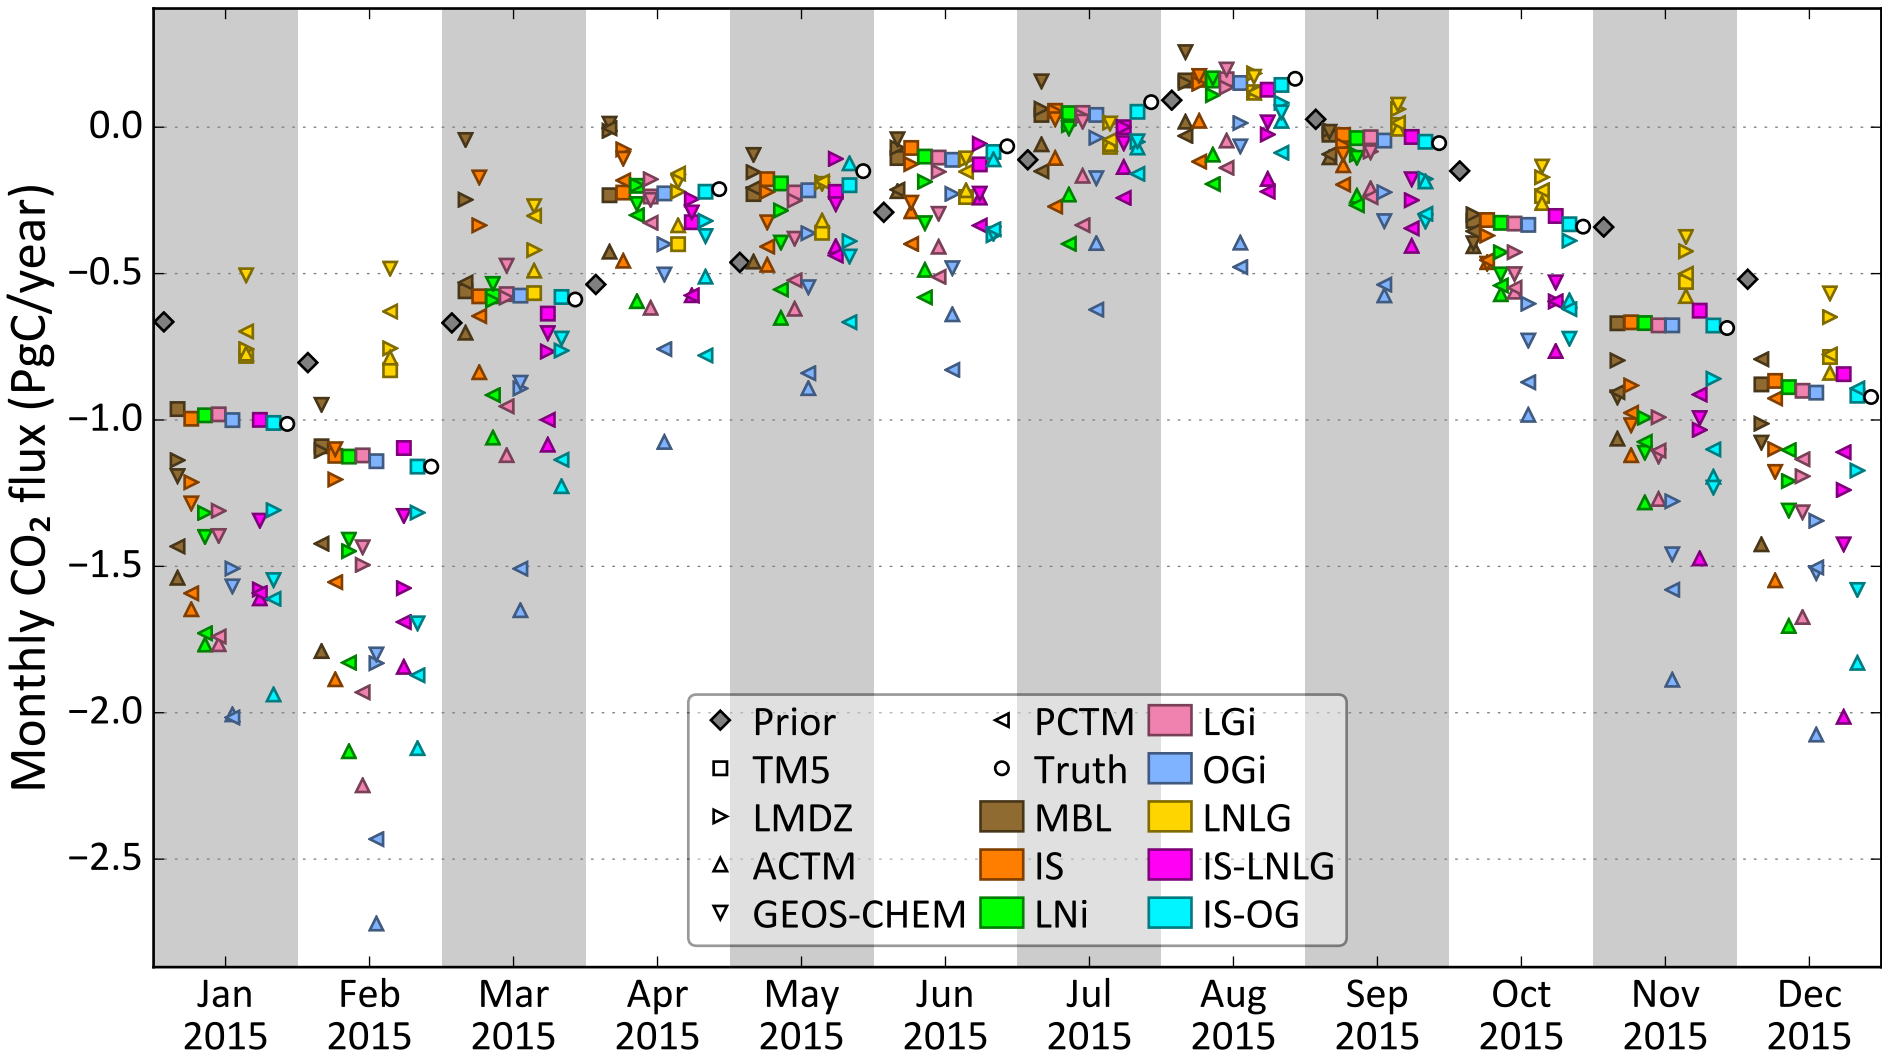

# Oceanic CO<sub>2</sub> flux from West Pacific Tropics

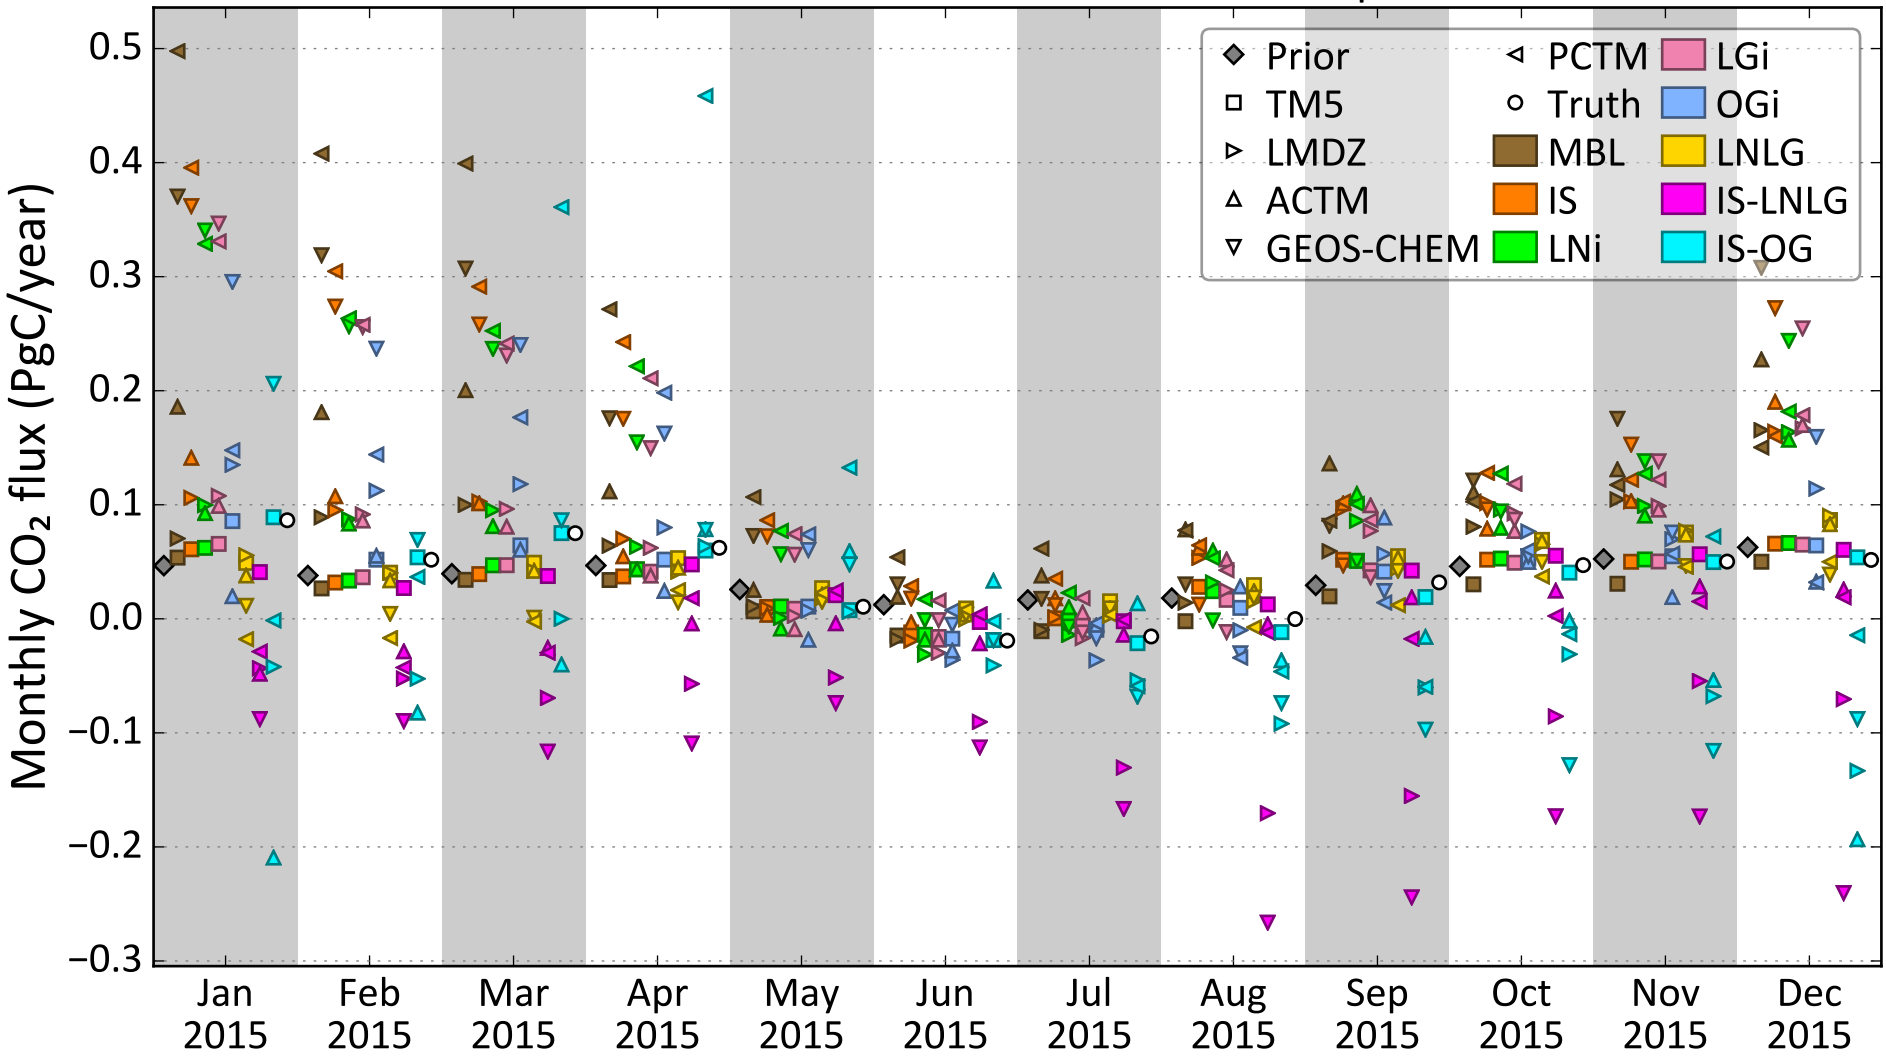

# Oceanic CO<sub>2</sub> flux from Indian Ocean

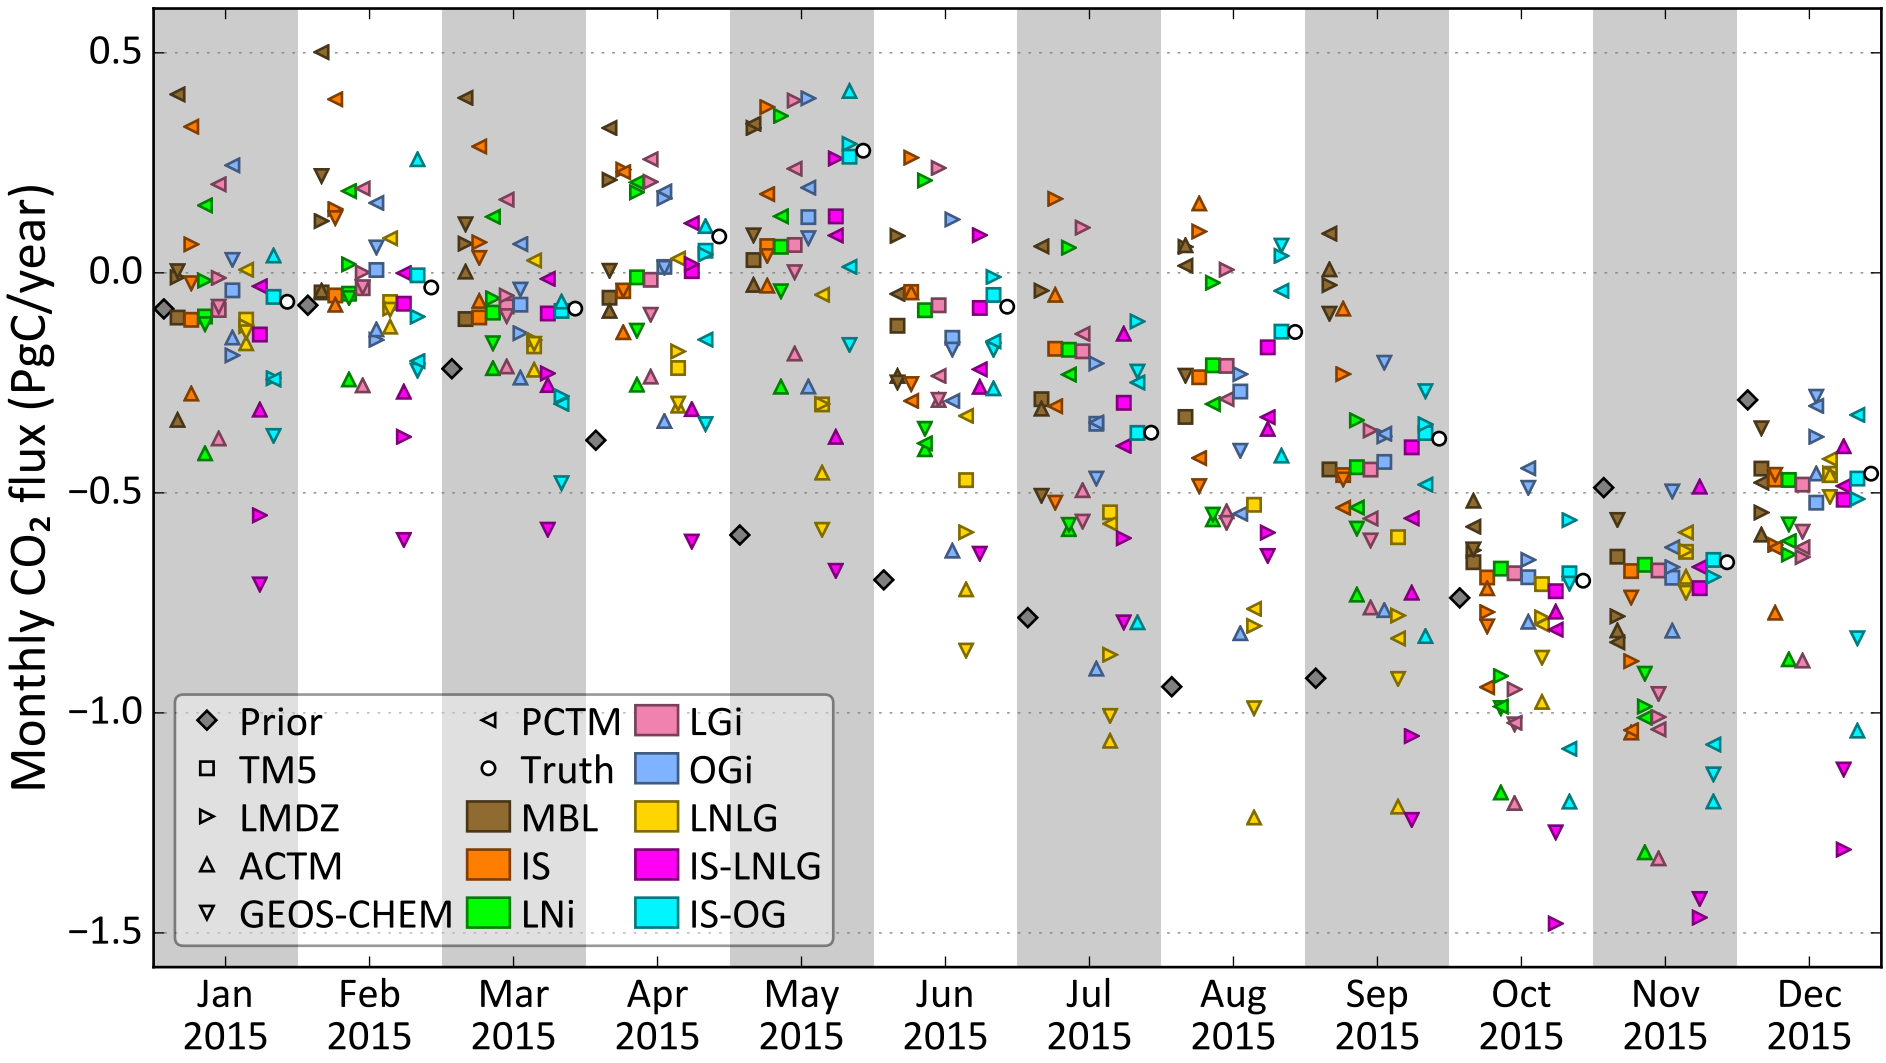

# Oceanic CO<sub>2</sub> flux from Pacific Ocean

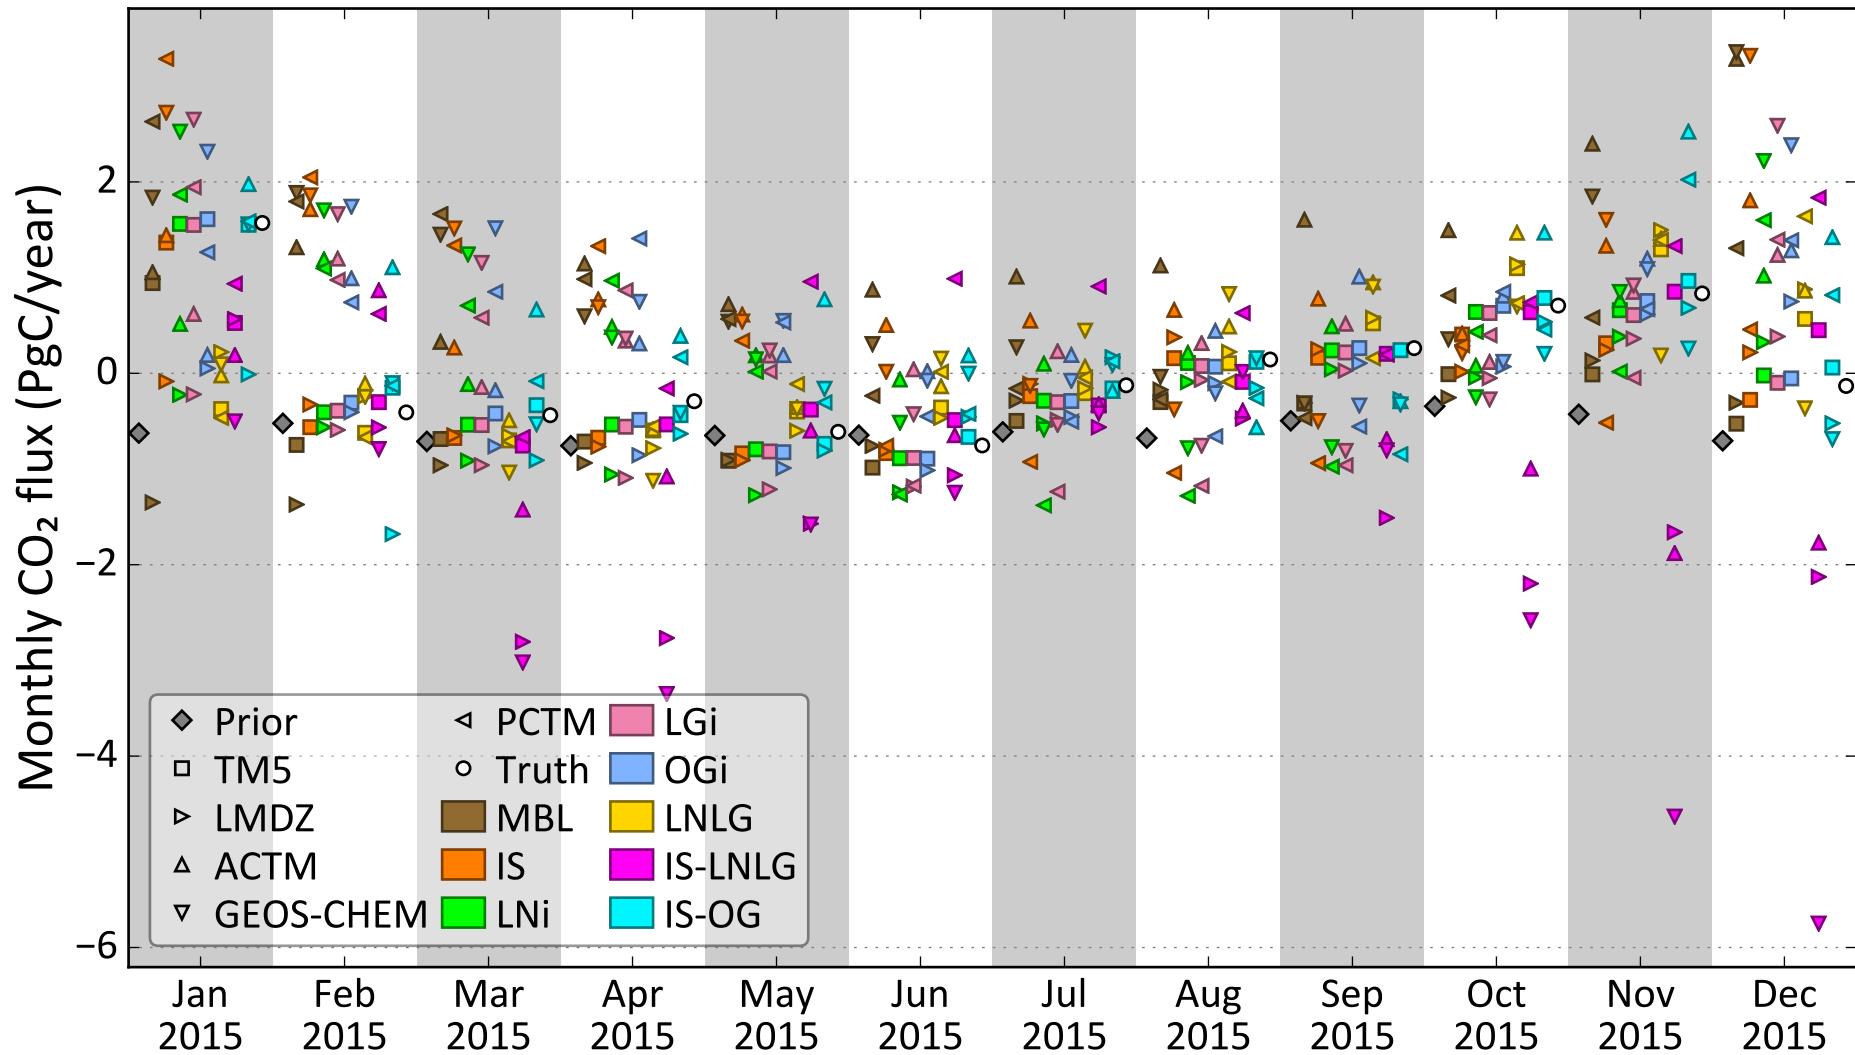

# Oceanic CO<sub>2</sub> flux from Atlantic Ocean

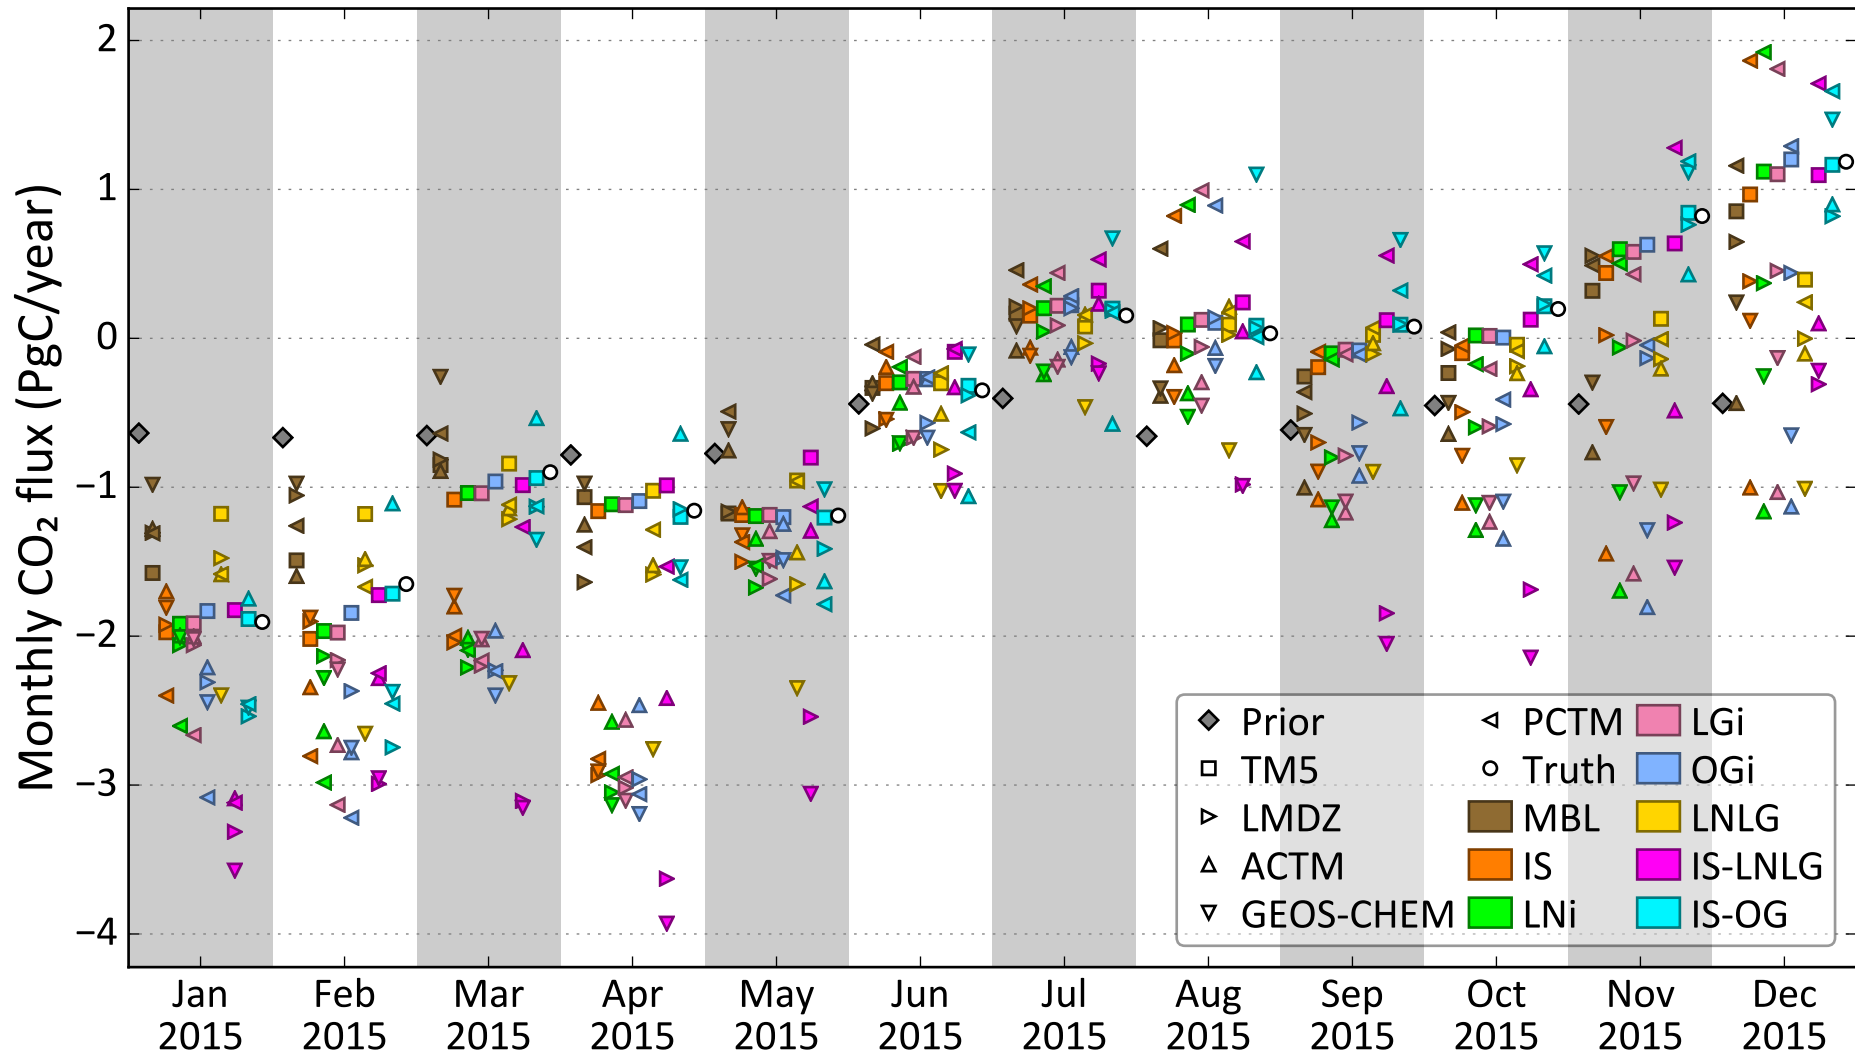

# Oceanic CO<sub>2</sub> flux from Tropical Ocean

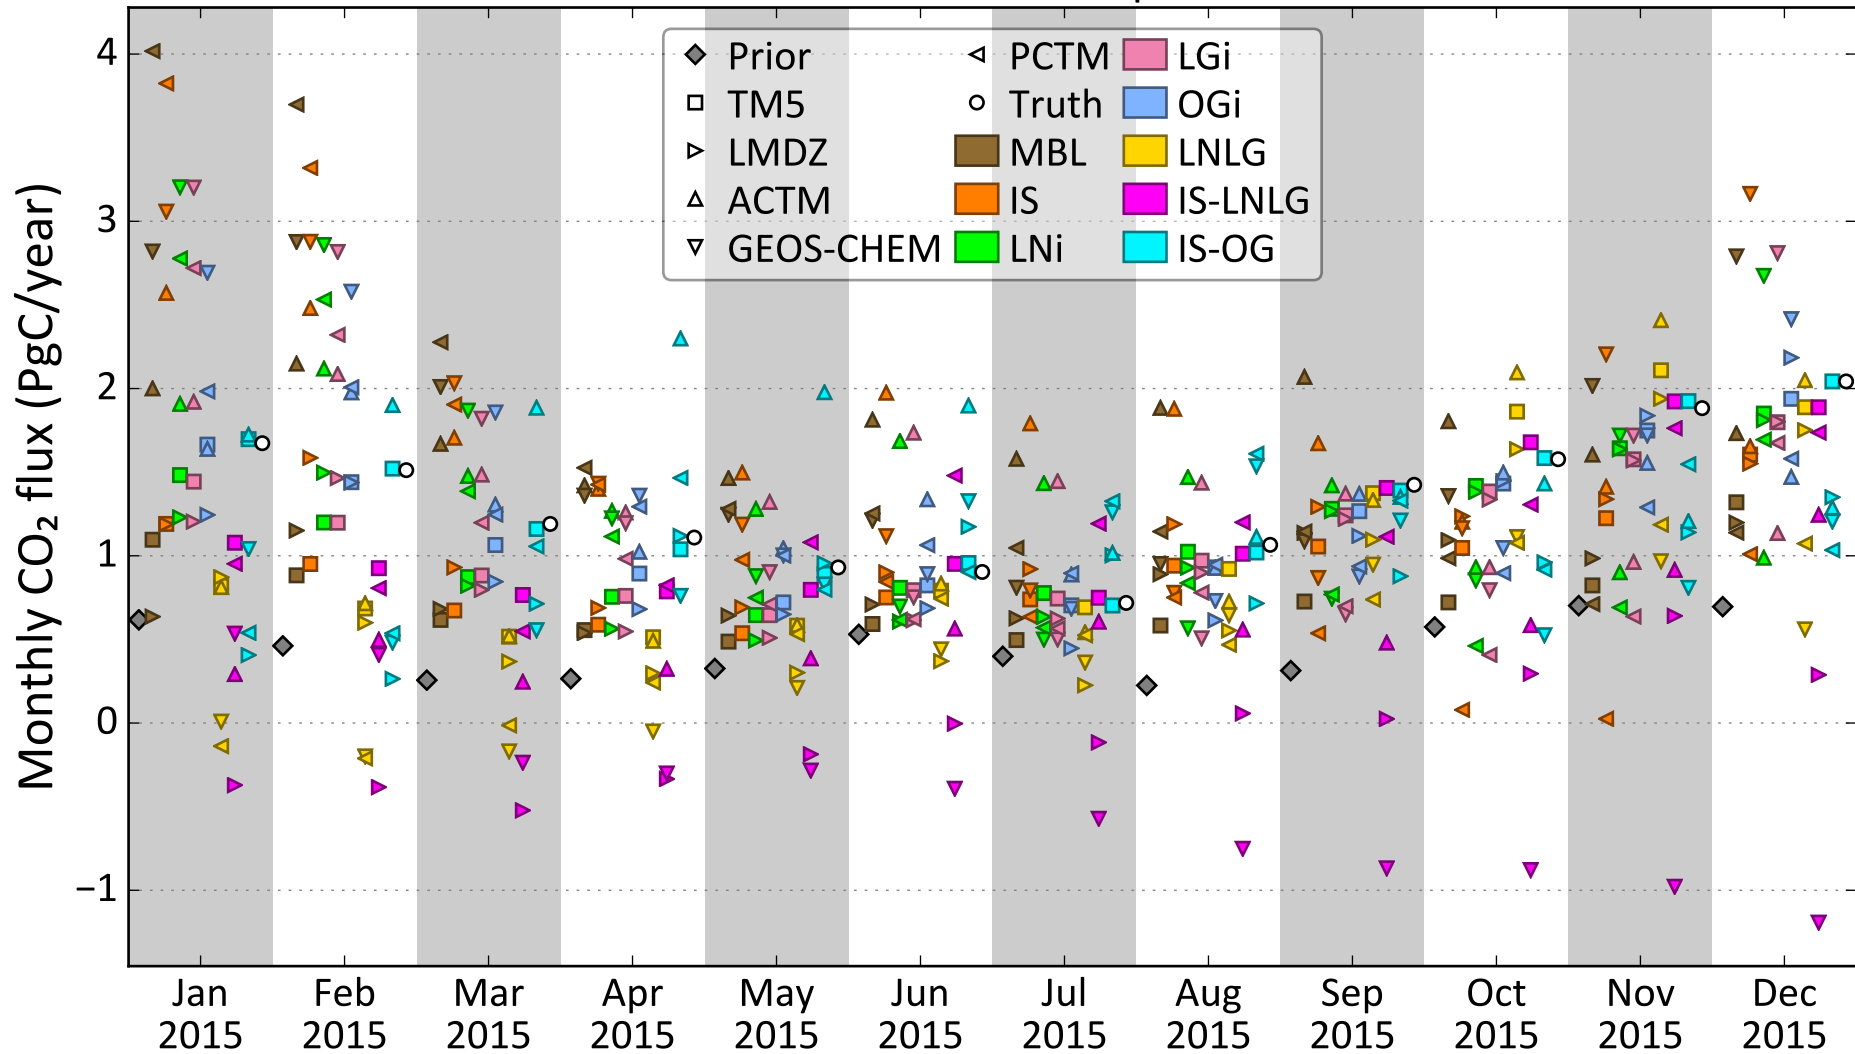

# Oceanic CO<sub>2</sub> flux from Southern Extra-Tropical Ocean

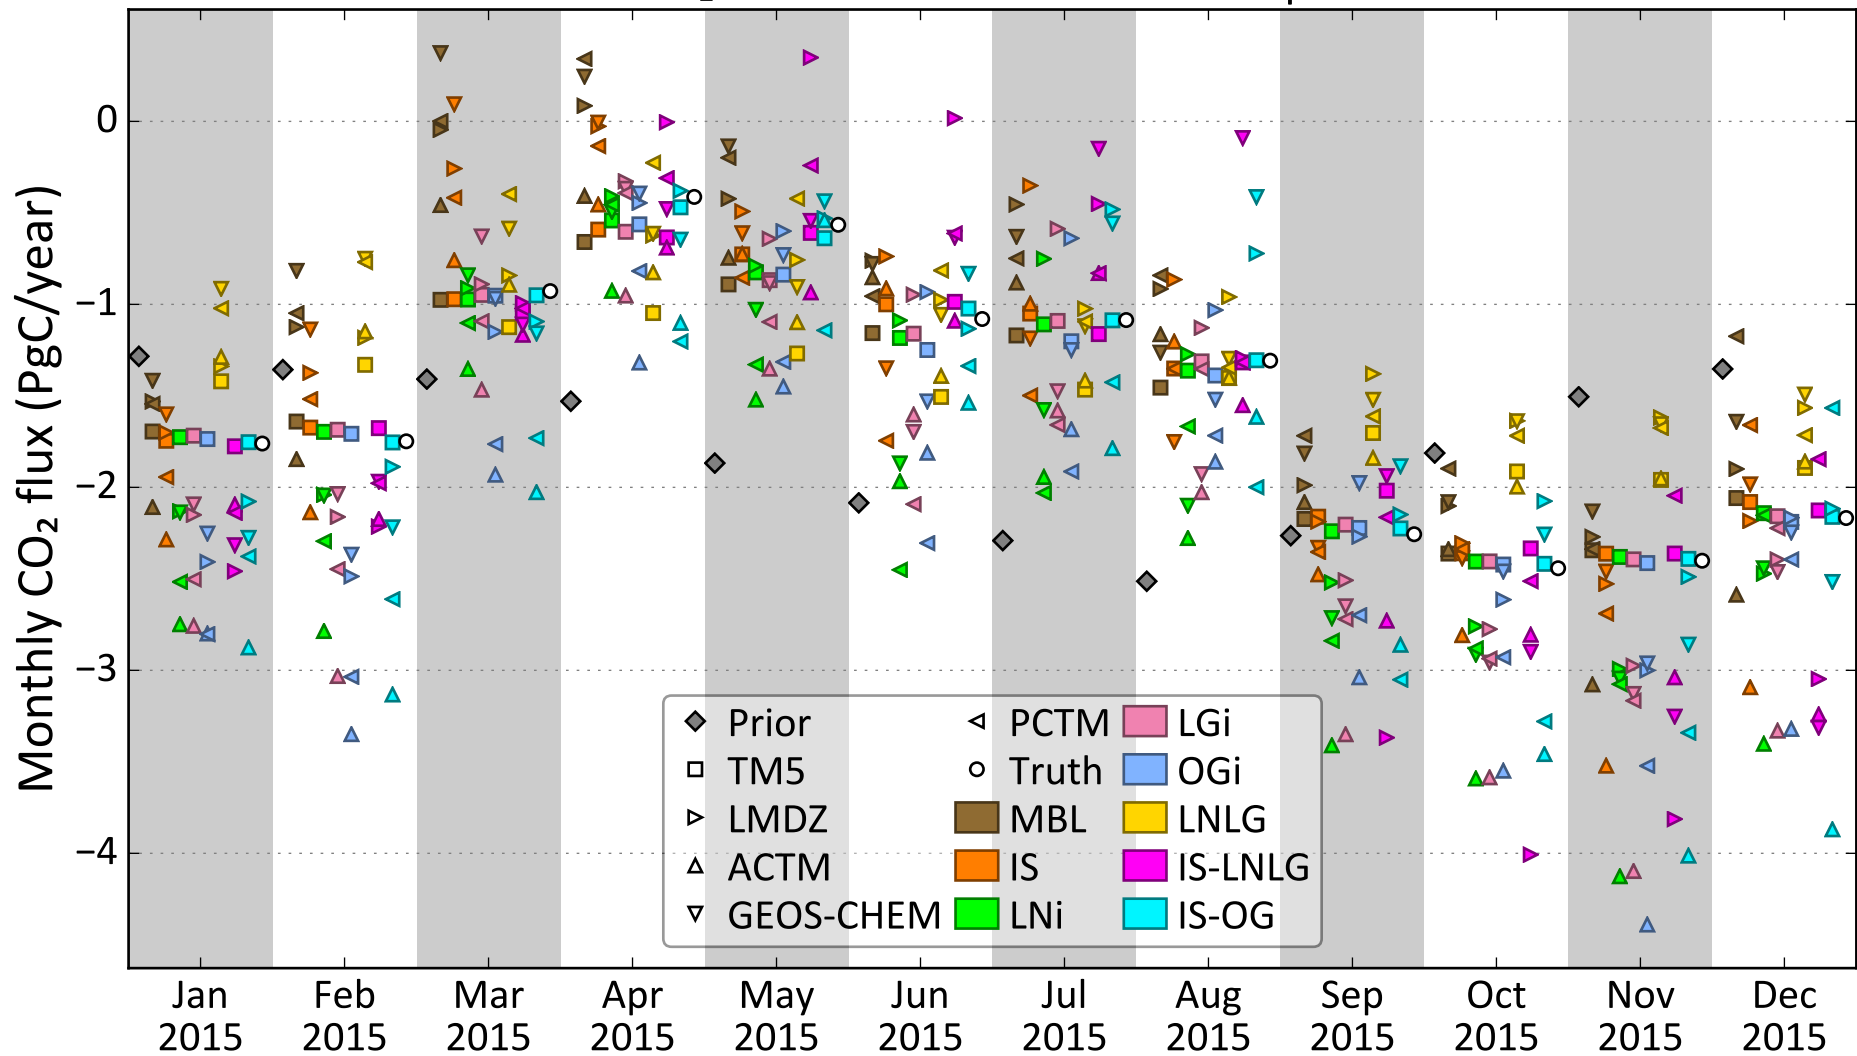

# Oceanic CO<sub>2</sub> flux from Northern Extra-Tropical Ocean

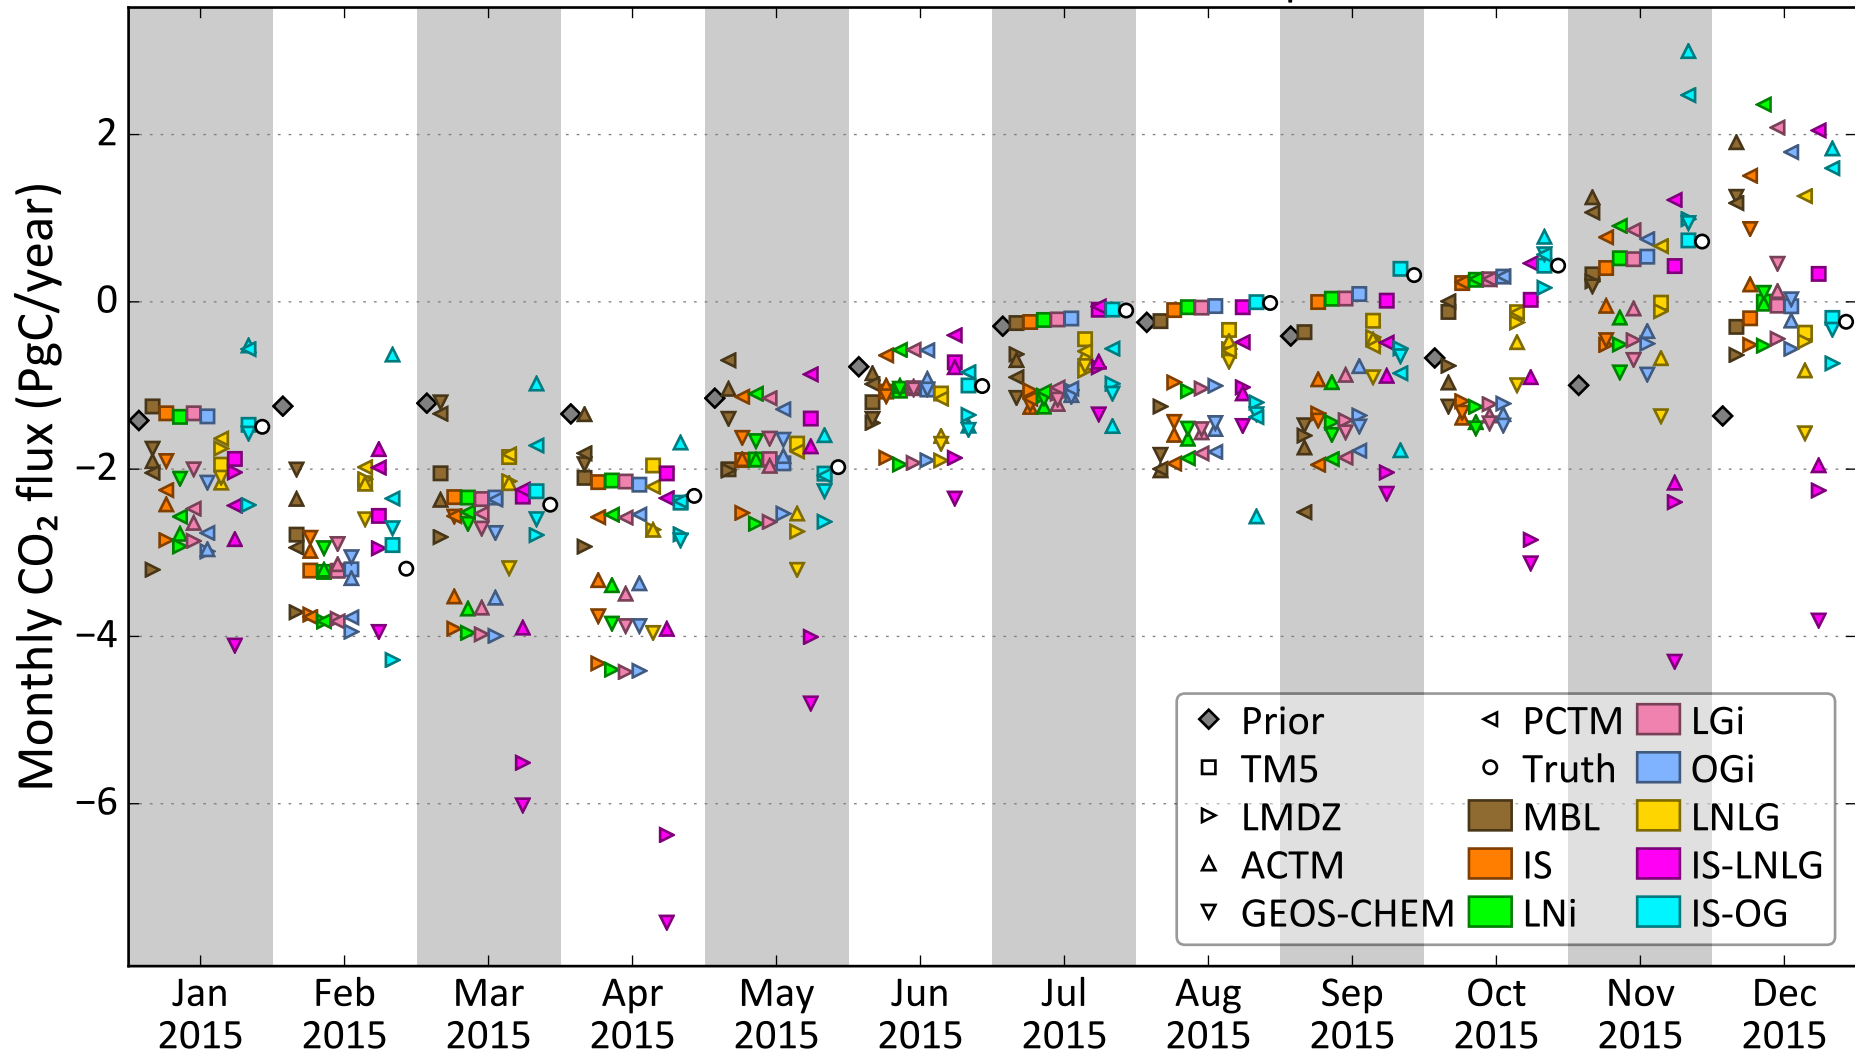

# Oceanic CO<sub>2</sub> flux from Global Ocean

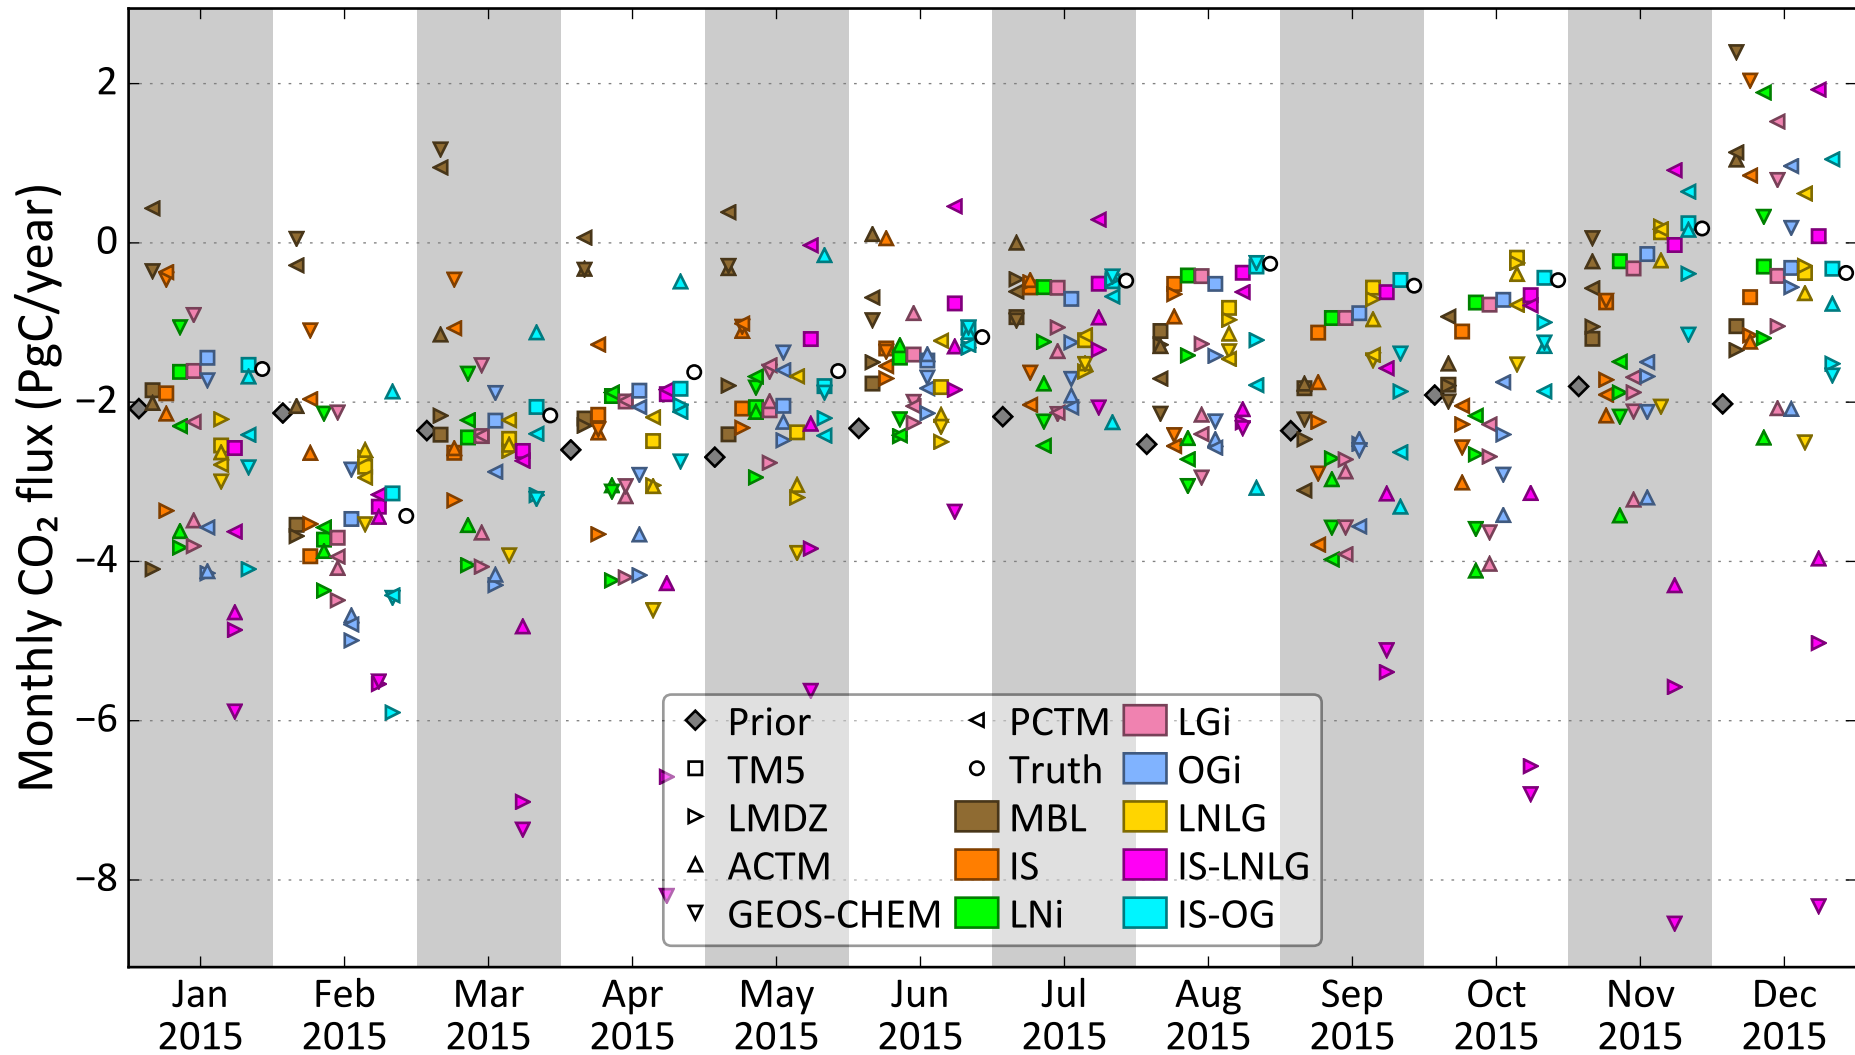

Supplement: Supplementary file 1 [file acp-18-7189-2018-supplement.zip › monthly_flux_sep_models_2.pdf]
