# Supplementary material for: The impact of transport model differences on CO 2 surface flux estimates from OCO-2 retrievals of column average CO 2
Source: Copernicus journal article supplement (doi:10.5194/acp-18-7189-2018), 2018-05-24
Supplement: Supplementary file 1 [file acp-18-7189-2018-supplement.zip]

Archive with 3 entries (3 files):
- acp-18-7189-2018-supplement-title-page.pdf
- monthly_flux_sep_models_2.pdf
- monthly_flux_sep_models_1.pdf
