# Supplementary material for: The impact of transport model differences on CO 2 surface flux estimates from OCO-2 retrievals of column average CO 2
Source: Copernicus journal article supplement (doi:10.5194/acp-18-7189-2018), 2018-05-24
Supplement: Supplementary file 1 [file acp-18-7189-2018-supplement.zip › acp-18-7189-2018-supplement-title-page.pdf]

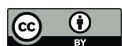

*Supplement of*

## **The impact of transport model differences on CO<sub>2</sub> surface flux estimates from OCO-2 retrievals of column average CO<sub>2</sub>**

**Sourish Basu et al.**

*Correspondence to:* Sourish Basu ([sourish.basu@colorado.edu](mailto:sourish.basu@colorado.edu))

- [acp-18-7189-2018-supplement-title-page.pdf](#)
- [monthly\\_flux\\_sep\\_models\\_1.pdf](#)
- [monthly\\_flux\\_sep\\_models\\_2.pdf](#)

The copyright of individual parts of the supplement might differ from the CC BY 4.0 License.
